# Supplementary material for: The GenTree Platform: growth traits and tree-level environmental data in 12 European forest tree species
Source: PubMed Central journal article supplement (PMC7970660; doi:10.1093/gigascience/giab010), 2021-03-18
Supplement: giab010_giga-d-20-00189_revision_1.pdf [file giab010_giga-d-20-00189_revision_1.pdf]

# GigaScience

## The GenTree Platform: growth traits and tree-level environmental data in twelve European forest tree species --Manuscript Draft--

|                                                      |                                                                                                                                                                                                                                                                                                                                                                                                                                                                                                                                                                                                                                                                                                                                                                                                                                                                                                                                                                                                                                                                                                                                                                                                                                                                                                                                                                                                                                                                                                                                                                                                                                                                                                                                                                                                                                                                                                                                                                                                                                                                                                                                                                                                                                                |                   |
|------------------------------------------------------|------------------------------------------------------------------------------------------------------------------------------------------------------------------------------------------------------------------------------------------------------------------------------------------------------------------------------------------------------------------------------------------------------------------------------------------------------------------------------------------------------------------------------------------------------------------------------------------------------------------------------------------------------------------------------------------------------------------------------------------------------------------------------------------------------------------------------------------------------------------------------------------------------------------------------------------------------------------------------------------------------------------------------------------------------------------------------------------------------------------------------------------------------------------------------------------------------------------------------------------------------------------------------------------------------------------------------------------------------------------------------------------------------------------------------------------------------------------------------------------------------------------------------------------------------------------------------------------------------------------------------------------------------------------------------------------------------------------------------------------------------------------------------------------------------------------------------------------------------------------------------------------------------------------------------------------------------------------------------------------------------------------------------------------------------------------------------------------------------------------------------------------------------------------------------------------------------------------------------------------------|-------------------|
| <b>Manuscript Number:</b>                            | GIGA-D-20-00189R1                                                                                                                                                                                                                                                                                                                                                                                                                                                                                                                                                                                                                                                                                                                                                                                                                                                                                                                                                                                                                                                                                                                                                                                                                                                                                                                                                                                                                                                                                                                                                                                                                                                                                                                                                                                                                                                                                                                                                                                                                                                                                                                                                                                                                              |                   |
| <b>Full Title:</b>                                   | The GenTree Platform: growth traits and tree-level environmental data in twelve European forest tree species                                                                                                                                                                                                                                                                                                                                                                                                                                                                                                                                                                                                                                                                                                                                                                                                                                                                                                                                                                                                                                                                                                                                                                                                                                                                                                                                                                                                                                                                                                                                                                                                                                                                                                                                                                                                                                                                                                                                                                                                                                                                                                                                   |                   |
| <b>Article Type:</b>                                 | Data Note                                                                                                                                                                                                                                                                                                                                                                                                                                                                                                                                                                                                                                                                                                                                                                                                                                                                                                                                                                                                                                                                                                                                                                                                                                                                                                                                                                                                                                                                                                                                                                                                                                                                                                                                                                                                                                                                                                                                                                                                                                                                                                                                                                                                                                      |                   |
| <b>Funding Information:</b>                          | Horizon 2020 Framework Programme (676876)                                                                                                                                                                                                                                                                                                                                                                                                                                                                                                                                                                                                                                                                                                                                                                                                                                                                                                                                                                                                                                                                                                                                                                                                                                                                                                                                                                                                                                                                                                                                                                                                                                                                                                                                                                                                                                                                                                                                                                                                                                                                                                                                                                                                      | Mr. Bruno Fady    |
|                                                      | Staatssekretariat für Bildung, Forschung und Innovation (6.0032)                                                                                                                                                                                                                                                                                                                                                                                                                                                                                                                                                                                                                                                                                                                                                                                                                                                                                                                                                                                                                                                                                                                                                                                                                                                                                                                                                                                                                                                                                                                                                                                                                                                                                                                                                                                                                                                                                                                                                                                                                                                                                                                                                                               | Mr. Felix Gugerli |
| <b>Abstract:</b>                                     | <p><b>Background:</b><br/>Progress in the field of evolutionary forest ecology has been hampered by the huge challenge of phenotyping trees across their ranges in their natural environments, and the limitation in high-resolution environmental information.</p> <p><b>Findings:</b><br/>The GenTree Platform contains phenotypic and environmental data from 4,959 trees from twelve ecologically and economically important European forest tree species: <i>Abies alba</i> Mill. (silver fir), <i>Betula pendula</i> Roth. (silver birch), <i>Fagus sylvatica</i> L. (European beech), <i>Picea abies</i> (L.) H. Karst (Norway spruce), <i>Pinus cembra</i> L. (Swiss stone pine), <i>Pinus halepensis</i> Mill. (Aleppo pine), <i>Pinus nigra</i> Arnold (European black pine), <i>Pinus pinaster</i> Aiton (maritime pine), <i>Pinus sylvestris</i> L. (Scots pine), <i>Populus nigra</i> L. (European black poplar), <i>Taxus baccata</i> L. (English yew), and <i>Quercus petraea</i> (Matt.) Liebl. (sessile oak). Phenotypic (height, diameter at breast height, crown-size, bark-thickness, biomass, straightness, forking, branch angle, fructification), regeneration, environmental in-situ measurements (soil depth, vegetation cover, competition indices), and environmental modeling data extracted by using bilinear interpolation accounting for surrounding conditions of each tree (precipitation, temperature, insolation, drought indices) were obtained from trees in 194 sites covering the species' geographic ranges and reflecting local environmental gradients.</p> <p><b>Conclusion:</b><br/>The GenTree Platform is a new resource for investigating ecological and evolutionary processes in forest trees. The coherent phenotyping and environmental characterization across 12 species in their European ranges allows for a wide range of analyses from forest ecologists, conservationists and macro-ecologists. In addition, the data here presented can be linked to the GenTree Dendroecological collection, the GenTree Leaf Trait collection, and the GenTree Genomic collection presented elsewhere, that together build the largest evolutionary forest ecology data collection available.</p> |                   |
| <b>Corresponding Author:</b>                         | Lars Opgenoorth<br>Philipps-Universität Marburg<br>Marburg, Hessen GERMANY                                                                                                                                                                                                                                                                                                                                                                                                                                                                                                                                                                                                                                                                                                                                                                                                                                                                                                                                                                                                                                                                                                                                                                                                                                                                                                                                                                                                                                                                                                                                                                                                                                                                                                                                                                                                                                                                                                                                                                                                                                                                                                                                                                     |                   |
| <b>Corresponding Author Secondary Information:</b>   |                                                                                                                                                                                                                                                                                                                                                                                                                                                                                                                                                                                                                                                                                                                                                                                                                                                                                                                                                                                                                                                                                                                                                                                                                                                                                                                                                                                                                                                                                                                                                                                                                                                                                                                                                                                                                                                                                                                                                                                                                                                                                                                                                                                                                                                |                   |
| <b>Corresponding Author's Institution:</b>           | Philipps-Universität Marburg                                                                                                                                                                                                                                                                                                                                                                                                                                                                                                                                                                                                                                                                                                                                                                                                                                                                                                                                                                                                                                                                                                                                                                                                                                                                                                                                                                                                                                                                                                                                                                                                                                                                                                                                                                                                                                                                                                                                                                                                                                                                                                                                                                                                                   |                   |
| <b>Corresponding Author's Secondary Institution:</b> |                                                                                                                                                                                                                                                                                                                                                                                                                                                                                                                                                                                                                                                                                                                                                                                                                                                                                                                                                                                                                                                                                                                                                                                                                                                                                                                                                                                                                                                                                                                                                                                                                                                                                                                                                                                                                                                                                                                                                                                                                                                                                                                                                                                                                                                |                   |
| <b>First Author:</b>                                 | Lars Opgenoorth                                                                                                                                                                                                                                                                                                                                                                                                                                                                                                                                                                                                                                                                                                                                                                                                                                                                                                                                                                                                                                                                                                                                                                                                                                                                                                                                                                                                                                                                                                                                                                                                                                                                                                                                                                                                                                                                                                                                                                                                                                                                                                                                                                                                                                |                   |
| <b>First Author Secondary Information:</b>           |                                                                                                                                                                                                                                                                                                                                                                                                                                                                                                                                                                                                                                                                                                                                                                                                                                                                                                                                                                                                                                                                                                                                                                                                                                                                                                                                                                                                                                                                                                                                                                                                                                                                                                                                                                                                                                                                                                                                                                                                                                                                                                                                                                                                                                                |                   |
| <b>Order of Authors:</b>                             | Lars Opgenoorth                                                                                                                                                                                                                                                                                                                                                                                                                                                                                                                                                                                                                                                                                                                                                                                                                                                                                                                                                                                                                                                                                                                                                                                                                                                                                                                                                                                                                                                                                                                                                                                                                                                                                                                                                                                                                                                                                                                                                                                                                                                                                                                                                                                                                                |                   |
|                                                      | Benjamin Dauphin                                                                                                                                                                                                                                                                                                                                                                                                                                                                                                                                                                                                                                                                                                                                                                                                                                                                                                                                                                                                                                                                                                                                                                                                                                                                                                                                                                                                                                                                                                                                                                                                                                                                                                                                                                                                                                                                                                                                                                                                                                                                                                                                                                                                                               |                   |
|                                                      | Raquel Benavides                                                                                                                                                                                                                                                                                                                                                                                                                                                                                                                                                                                                                                                                                                                                                                                                                                                                                                                                                                                                                                                                                                                                                                                                                                                                                                                                                                                                                                                                                                                                                                                                                                                                                                                                                                                                                                                                                                                                                                                                                                                                                                                                                                                                                               |                   |

|                               |
|-------------------------------|
| Katrin Heer                   |
| Paraskevi Alizoti             |
| Elisabet Martínez-Sancho      |
| Ricardo Alía                  |
| Olivier Ambrosio              |
| Albet Audrey                  |
| Camilla Avanzi                |
| Evangelia Avramidou           |
| Francesca Bagnoli             |
| Evangelos Barbas              |
| Cristina C. Bastias           |
| Catherine Bastien             |
| Eduardo Ballesteros           |
| Giorgia Beffa                 |
| Frédéric Bernier              |
| Henri Bignalet                |
| Guillaume Bodineau            |
| Damien Bouic                  |
| Sabine Brodbeck               |
| William Brunetto              |
| Jurata Buchovska              |
| Melanie Buy                   |
| Ana M. Cabanillas-Saldaña     |
| Bárbara Carvalho              |
| Nicolas Cheval                |
| José M. Climent               |
| Marianne Correard             |
| Eva Cremer                    |
| Darius Danusevičius           |
| Fernando Del Caño             |
| Jean-Luc Denou                |
| Nicolas di Gerardi            |
| Bernard Dokhelar              |
| Alexis Ducouso                |
| Eskild Nilsen                 |
| Anna-Maria Farsakoglou        |
| Patrick Fonti                 |
| Ioannis Ganopoulos            |
| José M. García del Barrio     |
| Olivier Gilg                  |
| Santiago C. González-Martínez |

|                       |
|-----------------------|
| René Graf             |
| Alan Gray             |
| Delphine Grivet       |
| Felix Gugerli         |
| Christoph Hartleitner |
| Enja Hollenbach       |
| Agathe Hurel          |
| Bernard Issehut       |
| Florence Jean         |
| Veronique Jorge       |
| Arnaud Jouineau       |
| Jan-Philipp Kappner   |
| Katri Kärkkäinen      |
| Robert Kesälähti      |
| Florian Knutzen       |
| Sonja Kujala          |
| Timo Kumpula          |
| Mariaceleste Labriola |
| Celine Lalanne        |
| Johannes Lambertz     |
| Martin Lascoux        |
| Vincent Lejeune       |
| Gregoire Le-Provost   |
| Joseph Levillain      |
| Mirko Liesebach       |
| David López-Quiroga   |
| Benjamin Meier        |
| Ermioni Malliarou     |
| Jérémy Marchon        |
| Nicolas Mariotte      |
| Antonio Mas           |
| Silvia Matesanz       |
| Helge Meischner       |
| Célia Michotey        |
| Pascal Milesi         |
| Sandro Morganti       |
| Daniel Nievergelt     |
| Eduardo Notivol       |
| Geir Ostreng          |
| Birte Pakull          |
| Annika Perry          |

|                                                |                                                                                                                                                                                                                                                                                                                                                                                                                                                                                                                                                                                                                                                                                                                                                                                             |
|------------------------------------------------|---------------------------------------------------------------------------------------------------------------------------------------------------------------------------------------------------------------------------------------------------------------------------------------------------------------------------------------------------------------------------------------------------------------------------------------------------------------------------------------------------------------------------------------------------------------------------------------------------------------------------------------------------------------------------------------------------------------------------------------------------------------------------------------------|
|                                                | Andrea Piotti                                                                                                                                                                                                                                                                                                                                                                                                                                                                                                                                                                                                                                                                                                                                                                               |
|                                                | Christophe Plomion                                                                                                                                                                                                                                                                                                                                                                                                                                                                                                                                                                                                                                                                                                                                                                          |
|                                                | Nicolas Poinot                                                                                                                                                                                                                                                                                                                                                                                                                                                                                                                                                                                                                                                                                                                                                                              |
|                                                | Mehdi Pringarbe                                                                                                                                                                                                                                                                                                                                                                                                                                                                                                                                                                                                                                                                                                                                                                             |
|                                                | Luc Puzos                                                                                                                                                                                                                                                                                                                                                                                                                                                                                                                                                                                                                                                                                                                                                                                   |
|                                                | Tanja Pyhäjärvi                                                                                                                                                                                                                                                                                                                                                                                                                                                                                                                                                                                                                                                                                                                                                                             |
|                                                | Annie Raffin                                                                                                                                                                                                                                                                                                                                                                                                                                                                                                                                                                                                                                                                                                                                                                                |
|                                                | José A. Ramírez-Valiente                                                                                                                                                                                                                                                                                                                                                                                                                                                                                                                                                                                                                                                                                                                                                                    |
|                                                | Christian Rellstab                                                                                                                                                                                                                                                                                                                                                                                                                                                                                                                                                                                                                                                                                                                                                                          |
|                                                | Dourthe Remi                                                                                                                                                                                                                                                                                                                                                                                                                                                                                                                                                                                                                                                                                                                                                                                |
|                                                | Sebastian Richter                                                                                                                                                                                                                                                                                                                                                                                                                                                                                                                                                                                                                                                                                                                                                                           |
|                                                | Juan J. Robledo-Arnuncio                                                                                                                                                                                                                                                                                                                                                                                                                                                                                                                                                                                                                                                                                                                                                                    |
|                                                | Sergio San Segundo                                                                                                                                                                                                                                                                                                                                                                                                                                                                                                                                                                                                                                                                                                                                                                          |
|                                                | Outi Savolainen                                                                                                                                                                                                                                                                                                                                                                                                                                                                                                                                                                                                                                                                                                                                                                             |
|                                                | Volker Schneck                                                                                                                                                                                                                                                                                                                                                                                                                                                                                                                                                                                                                                                                                                                                                                              |
|                                                | Ivan Scotti                                                                                                                                                                                                                                                                                                                                                                                                                                                                                                                                                                                                                                                                                                                                                                                 |
|                                                | Vladimir Semerikov                                                                                                                                                                                                                                                                                                                                                                                                                                                                                                                                                                                                                                                                                                                                                                          |
|                                                | Lenka Slámová                                                                                                                                                                                                                                                                                                                                                                                                                                                                                                                                                                                                                                                                                                                                                                               |
|                                                | Jørn Henrik Sønstebo                                                                                                                                                                                                                                                                                                                                                                                                                                                                                                                                                                                                                                                                                                                                                                        |
|                                                | Ilaria Spanu                                                                                                                                                                                                                                                                                                                                                                                                                                                                                                                                                                                                                                                                                                                                                                                |
|                                                | Jean Thevenet                                                                                                                                                                                                                                                                                                                                                                                                                                                                                                                                                                                                                                                                                                                                                                               |
|                                                | Mari Mette Tollefsrud                                                                                                                                                                                                                                                                                                                                                                                                                                                                                                                                                                                                                                                                                                                                                                       |
|                                                | Norbert Turion                                                                                                                                                                                                                                                                                                                                                                                                                                                                                                                                                                                                                                                                                                                                                                              |
|                                                | Giovanni Giuseppe Vendramin                                                                                                                                                                                                                                                                                                                                                                                                                                                                                                                                                                                                                                                                                                                                                                 |
|                                                | Marc Villar                                                                                                                                                                                                                                                                                                                                                                                                                                                                                                                                                                                                                                                                                                                                                                                 |
|                                                | Georg Von Arx                                                                                                                                                                                                                                                                                                                                                                                                                                                                                                                                                                                                                                                                                                                                                                               |
|                                                | Johan Westin                                                                                                                                                                                                                                                                                                                                                                                                                                                                                                                                                                                                                                                                                                                                                                                |
|                                                | Bruno Fady                                                                                                                                                                                                                                                                                                                                                                                                                                                                                                                                                                                                                                                                                                                                                                                  |
|                                                | Tor Myking                                                                                                                                                                                                                                                                                                                                                                                                                                                                                                                                                                                                                                                                                                                                                                                  |
|                                                | Fernando Valladares                                                                                                                                                                                                                                                                                                                                                                                                                                                                                                                                                                                                                                                                                                                                                                         |
|                                                | Filippos A. Aravanopoulos                                                                                                                                                                                                                                                                                                                                                                                                                                                                                                                                                                                                                                                                                                                                                                   |
|                                                | Stephen Cavers                                                                                                                                                                                                                                                                                                                                                                                                                                                                                                                                                                                                                                                                                                                                                                              |
| <b>Order of Authors Secondary Information:</b> |                                                                                                                                                                                                                                                                                                                                                                                                                                                                                                                                                                                                                                                                                                                                                                                             |
| <b>Response to Reviewers:</b>                  | <p>General comments from the Editor</p> <p>The reviewers' reports are below. Please pay particular attention to reviewer 1's points regarding sampling methodology and data structure (e.g. will it be possible to include time series / repeated measurements?).</p> <p>Please include a point-by-point within the 'Response to Reviewers' box in the submission system. Please ensure you describe additional experiments that were carried out and include a detailed rebuttal of any criticisms or requested revisions that you disagreed with. Please also ensure that your revised manuscript conforms to the journal style, which can be found in the Instructions for Authors on the journal homepage. If the data and code has been modified in the revision process please be</p> |

sure to update the public versions of this too.

Reviewer reports:

Reviewer #1

This Data Note introduces the 'GenTree Platform' - consisting of phenotypic (coarse tree-level traits) and environmental data at individual tree level from ~5000 trees of 12 important European species. At each tree, a set of traits are scored and data taken on soil depth, vegetation and other site data at 194 sites (covering ranges of species and environmental gradients). Modelled climate and soil data (i.e., from layers) have been extracted from external datasets and presented as well. Populations (25 trees) were sampled at up to 20 sites per species.

The dataset forms a new fragment of a larger database 'GenTree' with leaf trait, genomic and dendroecological nodes. It is not clear why each of these modules should be treated individually when they appear to deal with the same trees but perhaps that is for historical and practical reasons.

The dataset appears to be well formulated, significant in size and collection/collaboration effort, and is a useful and novel addition to functional ecology data available, in that it is presented in an easily accessible way and provides data not easily otherwise available. The gentree dataset as a whole appears to be significant in its standardised methods and depth of data at tree level on many facets of genetics, traits and environment.

MAJOR COMMENTS:

1. I don't think there is any reference to repeat measurements other than mention of tagging for 'potential subsequent additional ... sampling'? Does this dataset represent a single measurement - presumably it does? Is it intended that these tagged trees and sites be re-measured? If so, with what protocol and frequency (i.e. what needs to be repeated and what doesn't) and how will that data be integrated or presented with these?

The reviewer is right, that there is no resampling scheme in place. Instead, the permanent marking of trees is meant to offer the chance either to individual studies aimed just at a subset of sites/trees or to a later comprehensive project to resample trees and thus make use of time-series data. For example, there is a new EU project called FORGENIUS (<http://www.euforgen.org/about-us/news/news-detail/forgenius-a-new-project-to-revolutionise-our-understanding-of-forest-diversity/>), that will start January 1st and will make use of a subset of the sites/trees by revisiting them and obtaining additional phenotypic measurements. That said, we have now stated this point explicitly in the text starting in line 338:

"Every tree was permanently labeled so that future studies can resample subsets or the entire GenTree collection for gaining time-series data of individual traits or to add new phenotypes to the analyses. Be aware, that permission of the respective landowners must be obtained prior to sampling."

2. The data are arranged by country/species/population/individual as far as I can tell - how are measurements in a time series (whether it yet exists or not) identified - should there be a visit number, date or ID field as well? I don't get the feeling that future data addition and re-sampling has been incorporated specifically in the protocols or data formatting. This needs to be addressed in the manuscript and the date/year or sampling should appear in the data in any case (a visit or measurement series number field may also be useful as data are added temporally).

We agree with the reviewer and have thus added columns with the respective visiting dates in the data frame.

3. The introductory parts suggest that the dataset addresses limitations in high-resolution environmental information associated with trees. Certainly, the site-based soil and topography measurements address this, but the additional soil grids and CHELSA climate data do not increase environmental information, only extract and present it alongside the site data in a convenient analysis-ready format. Please revise the text to be clear that this aspect of the dataset is a compilation/merge of data, not the creation of new high-resolution environmental data.

It is correct that only our on-site measurements are really highly resolved environmental data in the given context and that some of the modeled data resolves mainly on site-scale. However, some of the modelled data is downscaled to tree-level which is an added value, a step that does increase the environmental information on top of the noted convenience. However, we agree that we should be more specific here as to not raise wrong expectations in the introduction. The text in line 264 ff now reads:

“However, progress in this field has been hampered by limited genomic resources, the lack of small-scale, individual tree-level-resolution environmental information 13.... In addition to onsite environmental measurements, we provide modelled and downscaled data for our sites and for individual tree level respectively.”

4.Line numbers would have been convenient for reference.

We are sorry! We have included them now.

MINOR COMMENTS:

5.Abstract: Please correct inconsistent capitalisation of common names.

I assume you are referring to the spelling of Silver fir – which should be silver fir. Thank you for pointing it out. Just in case you are referring to the fact that some of the names are in capitals and others not – this is intentional – as the correct spelling varies – e.g. when a country name is involved as in Swiss stone pine – then Swiss needs to be capitalized.

6.CONTEXT - I think the context should give brief 'context' of the data type presented in relation to other datasets. There are clear differences compared to species and plot level measurements of tree traits and cover etc. but it could be useful for a potential user to get a feel for this here given there are now a number of databases. What other available datasets include comparable individual tree data? There will be a number for dbh at least but the value of the gentree dataset seems to lie in the depth of other information collected and compiled for each tree, whereas other forest datasets focus more on good distribution/population data for stands in height, dbh, mortality etc. of many trees - so please make this point of difference clear here (individual versus stand level data) if that is the correct focus. What is different about the dataset and how does it fit with others?

We appreciate the need to give some background on other available datasets/databases. We have added this paragraph starting in line 283:

“We investigated the extent to which other datasets comparable to the data presented here exist by screening our twelve species in the TRY Plant Trait Data Base, the ITDRB, and the biomass and allometry data base for woody plants (BAAD). While this is a systematic approach, it leaves out a large number of tree species and therefore we cannot claim to have a comprehensive overview of the existing data. However, all three databases are large collections that include at least some of the tree measurements we present. Even though these are tremendous resources, the major difference is that based on their nature as collecting points of numerous independent datasets, there is no coherent sampling scheme in these collections as such, meaning that the number of trees per site, the way of tree selection, measured phenotypes, and provided environmental information vary greatly and therefore do not allow for coherent comparative analyses such as those of the GenTree Platform. For example, BAAD reports DBH data for only four of the species presented here, namely *Betula pendula* with three populations, *Fagus sylvatica* with two populations, *Picea abies* with four populations, and *Pinus sylvestris* with ten populations. In the larger TRY database, all of our species are represented, but the variability of sampling schemes is much more heterogenous in relation to traits, number of populations per species, and metadata. For example, DBH measurements are being reported 232 times from a total of 12 *Betula pendula* populations. Of these the vast majority of the 170 measurements are from one population while from many other populations only one or up to five measurements are reported. Also, the measurements stem from five different original studies and thus having very different levels of additional information. We conclude that the core value of our reported data lies in the coherent sampling design and yet large number of sampled populations and individuals per species.”

7.First sentence reads as though climate and land use changes will only have a future and not a present-day impact.

Changed. It now states starting in line 235:

“The impacts of climate change and land-use change on forests are already severe, as observed, for example, following the extreme summer drought of 2018 that triggered a massive increase in mortality in Central European forests<sup>1</sup>. Furthermore, changes are expected to be acute in the future.”

8.re:'In the light of these changes, species and forest ecosystem resilience will depend on the extent and structure of genetic variation and adaptive potential.' What about physiological resilience/acclimation at individual level as well as dispersal?

Changed. The sentence now states starting in line 244:

“In the light of these changes, species and forest ecosystem resilience will depend on the extent and structure of phenotypic plasticity, genetic variation and adaptive potential, as well as dispersal ability.”

9.re:'extensive gene flow' Could extensive gene flow not work against local adaptation? It does for sure. The term "extensive gene flow" was misplaced in the flow of the sentence. It now reads starting in line 248:  
 "In Europe, where most tree populations have established following post-glacial recolonization, such patterns of local adaptation must have developed rapidly and despite long generation time and extensive gene flow , a process enabled by high levels of within-population plasticity, genetic and epigenetic variation, and large population sizes ."

Thank you for pointing it out!

10.METHODS - 'Growth' traits are only mentioned in the title - can you define or refer to this phrase here? It is only called 'tree phenotypes' here. Growth could equally be structural or some other word - from the title I was expecting traits relating to growth rate or mode.  
 We exchanged the term tree phenotype with growth traits in line 389, as essentially all our tree level phenotypes can be regarded as growth traits.

11.Vegetation cover is estimated visually in coarse % categories. Is a proportion of that estimate is made up by the subject tree, or does that cover estimate exclude the tree itself? Does it include canopy/shrub/ground layers?  
 It only included ground vegetation – not the tree cover itself. We have now made this clear by adding "without tree cover" in the following sentence in line 377:  
 "Surrounding each target tree, slope, vegetation cover (without tree cover), and stone content were assessed in a 10 m x 10 m plot."

12.re:'show no signs of significant damage due to pests and diseases or generally low vigor' what is the justification for this? Can't stress/pest damage be a part of the trees' natural state in a given environment? e.g., how would this affect future repeat sampling of these permanently marked trees if, as you say, climate and land-use changes are expected to significantly impact tree regeneration, growth and health? Or how would one go about sampling additional sites with your method if there were no healthy trees remaining?  
 You are of course right, that stress/pest damage are part of the trees natural states and could even be extremely interesting in association studies. However, given that each of such states would be additional "treatments" – our number of repeats on the single tree level would just not be sufficient to adequately analyze this. For this reason, we decided to choose only "normal" "healthy" trees.

13.Regeneration: why are seedlings not counted in the plot but scored categorically? Is it to save time?  
 Yes. Unfortunately – given that the field campaigns were very time and resource consuming we had to make some tough choices. This was one of them.

14.Climate: while CHELSA is a suitable dataset it isn't especially high resolution by today's standards - it is highly likely, for example, that gridded values extracted at the location of individual trees within a population/site will come from the same grid cell on a climate layer. Obviously, truly individual data would be in the realm of microclimatic measurement, which is not in the scope of this dataset (perhaps a consideration for future repeat sampling?) but is expected based on the abstract and introduction.  
 Needs some re-wording to be clear that this is an extraction/compilation exercise rather than data generation per se, i.e., you are making use of high-resolution products that are now available, and packing that data with your own.  
 We agree with the comments by the reviewer that CHELSA by itself is not capturing microclimatic conditions and indeed, as indicated in another reply, there is already at least one follow-up project that will utilize some of the sites and will install beside other climate sensors. That said, our extraction method using bilinear interpolation accounts for the surrounding conditions of each tree. We have complemented the original text in the abstract in line 216:  
 "...and environmental modeling data extracted by using bilinear interpolation accounting for surrounding conditions of each tree (precipitation, temperature, insolation, drought indices) were obtained from trees in 194 sites covering the species' geographic ranges and reflecting local environmental gradients."  
 Also we included this information in the Material and Methods section starting in line 470:  
 "We extracted all modeled environmental values for each individually geo-referenced tree using the extract function of the R package RASTER (Hijmans and van Etten 2016). The surrounding conditions (i.e. adjacent pixels) of each individual tree were incorporated by the bilinear interpolation method when extracting the data."

15. Figure 1. Perhaps self-evident, but there is no key - could you at least refer to sites (points) and distributions (dark green) or something in the caption? A useful and clear figure.

Thank you for pointing this out. We have rephrased the figure capture starting in line 501:  
 "Sampling sites (black dots) and distributions of the twelve selected tree species (dark green shading) for in-situ phenotype measurements. Distribution maps are based on a comprehensive high-resolution tree occurrence dataset from the European Union."

16. Figures 2&3 are very useful information for re-use, thank you.  
 Thank you!

17. Data: There isn't an obvious reason why these data can't be presented in a single spreadsheet/file instead of three (metadata, site data and extracted environmental data) given they are in xls format (i.e., tabs for metadata) and the data tables both have fields per individual tree. Wouldn't that make it easier to access/store and use? But perhaps data modules are treated separately because there are many more available from other gentree nodes?  
 Indeed, our rationale is the inter-usability with other GenTree data and products, which is why we would like to retain the structure as is.

18. Unless I have missed it, appears not to have a field referring to survey number/ID/date etc, which means the structure will have to be changed as soon as repeat measures are included. Date/year should be a basic field in any case so that data can be matched to climate seasons/trends over time. The time of sampling appears to be excluded.  
 See comment above, we have now included this information.

19. Do you mention the open access CC0 licence anywhere in the paper (it appears in the linked figshare dataset)? Users will want to know if it is freely available as some such datasets require permission from the data owners.  
 Thank you for this note. The sentence now reads in line 482:  
 "These data files are available at figshare data repository open access under a CC0 license. (<https://figshare.com/s/4d57474fd63864a6dfd8>)."

Reviewer #2:

1) The manuscript present a relevant dataset for forest scientists. The dataset is broad and valuable. The manuscript is clear and it is well structured and written. Data are stored in figshare where the authors stated that 4 different files are included. However only three files are in the figshare site (<https://figshare.com/s/4d57474fd63864a6dfd8>) this point should clarify in the manuscript. Additionally, although it is indicated that 4 csv files are available in the repository (<https://figshare.com/s/4d57474fd63864a6dfd8>) only 3 files are available and only one it is in csv (the other two are xlsx files) I suggest to complete the 4 files and use csv format for all of them.  
 The reviewer is right in relation to figshare. This was a confusion on our side, since for GigaScience we had to provide all data in csv files to their ftp server, we switched numbers. On the ftp server the env data is in 4 csv files. The way we present the data on figshare is only three files and it is the correct number of files in fact. We thus would like to keep them as they are there with the inclusion of sampling date though.

**MINOR COMMENTS**

In Methods (competition index at tree level)

1) I would suggest to reorder the author recognition by writing Lorimer et al and Canham et al (and not the reverse as is in the manuscript) because Lorimer et al paper is previous to the Lorimer et al one.  
 We agree and have changed the order in lines 360 following.

2) when authors note that 'each stem larger than 15 cm..' must be noted that this value is for dbh  
 Done. We have included the term DBH in line 375.

In Methods (regeneration)

1) When talking about 'paternity', should maternity be written instead?  
 We agree and have changed it accordingly in line 387.

In Methods (tree phenotypes)

1) at the end of DBH (cm) indicate that average is used only when authors dealt with multistem trees.  
 There are two mentions of average in the DBH section. The first refers to the method when using a caliper. There two perpendicular measurements were made and then the average of the two was taken. We have now included this specification there in line 392:



|                                                                                                                                                                                                                                                                                                                                                                                                                                                 |                                                                                                                                                                                                                                                                                                                                                                                                                                                                                                                                                                                                                                                                                                                                                                                                                                                                                                                                                                                                                                                                                                                                                                                                                   |
|-------------------------------------------------------------------------------------------------------------------------------------------------------------------------------------------------------------------------------------------------------------------------------------------------------------------------------------------------------------------------------------------------------------------------------------------------|-------------------------------------------------------------------------------------------------------------------------------------------------------------------------------------------------------------------------------------------------------------------------------------------------------------------------------------------------------------------------------------------------------------------------------------------------------------------------------------------------------------------------------------------------------------------------------------------------------------------------------------------------------------------------------------------------------------------------------------------------------------------------------------------------------------------------------------------------------------------------------------------------------------------------------------------------------------------------------------------------------------------------------------------------------------------------------------------------------------------------------------------------------------------------------------------------------------------|
|                                                                                                                                                                                                                                                                                                                                                                                                                                                 | <p>“DBH was measured at a stem height of 1.3 m using either a caliper by measuring two perpendicular diameters and subsequently taking the average of these two measurements or by measuring the circumference of the tree using a tape and computing the diameter from that value.”</p> <p>In the second sentence, the average was recorded “if a tree had more than one trunk”. We think that this usage of average should be clear.</p> <p>2) In the Heigh section, a clarification about slope correction method used when heigh measurements is needed</p> <p>We have added the following text in line 400:</p> <p>“To forego errors introduced by measuring height on sloping ground, height measurements on slopes were conducted from the same elevation as the tree’s base by approaching the tree sideways. Where this was not possible, a slope correction factor was used.”</p> <p>3) References - Please check this section some of the referencies are not complete (ie, # 4, 16, 29,...)</p> <p>We have checked the references and corrected them where necessary. That said, we believe that the specifically mentioned reference #4 was cited correctly according the journals requirements.</p> |
| <b>Additional Information:</b>                                                                                                                                                                                                                                                                                                                                                                                                                  |                                                                                                                                                                                                                                                                                                                                                                                                                                                                                                                                                                                                                                                                                                                                                                                                                                                                                                                                                                                                                                                                                                                                                                                                                   |
| <b>Question</b>                                                                                                                                                                                                                                                                                                                                                                                                                                 | <b>Response</b>                                                                                                                                                                                                                                                                                                                                                                                                                                                                                                                                                                                                                                                                                                                                                                                                                                                                                                                                                                                                                                                                                                                                                                                                   |
| Are you submitting this manuscript to a special series or article collection?                                                                                                                                                                                                                                                                                                                                                                   | No                                                                                                                                                                                                                                                                                                                                                                                                                                                                                                                                                                                                                                                                                                                                                                                                                                                                                                                                                                                                                                                                                                                                                                                                                |
| <p><b>Experimental design and statistics</b></p> <p>Full details of the experimental design and statistical methods used should be given in the Methods section, as detailed in our <a href="#">Minimum Standards Reporting Checklist</a>. Information essential to interpreting the data presented should be made available in the figure legends.</p> <p>Have you included all the information requested in your manuscript?</p>              | Yes                                                                                                                                                                                                                                                                                                                                                                                                                                                                                                                                                                                                                                                                                                                                                                                                                                                                                                                                                                                                                                                                                                                                                                                                               |
| <p><b>Resources</b></p> <p>A description of all resources used, including antibodies, cell lines, animals and software tools, with enough information to allow them to be uniquely identified, should be included in the Methods section. Authors are strongly encouraged to cite <a href="#">Research Resource Identifiers</a> (RRIDs) for antibodies, model organisms and tools, where possible.</p> <p>Have you included the information</p> | Yes                                                                                                                                                                                                                                                                                                                                                                                                                                                                                                                                                                                                                                                                                                                                                                                                                                                                                                                                                                                                                                                                                                                                                                                                               |

|                                                                                                                                                                                                                                                                                                                                                                                                                                                                                                                                                         |            |
|---------------------------------------------------------------------------------------------------------------------------------------------------------------------------------------------------------------------------------------------------------------------------------------------------------------------------------------------------------------------------------------------------------------------------------------------------------------------------------------------------------------------------------------------------------|------------|
| <p>requested as detailed in our <a href="#">Minimum Standards Reporting Checklist</a>?</p>                                                                                                                                                                                                                                                                                                                                                                                                                                                              |            |
| <p><b>Availability of data and materials</b></p> <p>All datasets and code on which the conclusions of the paper rely must be either included in your submission or deposited in <a href="#">publicly available repositories</a> (where available and ethically appropriate), referencing such data using a unique identifier in the references and in the “Availability of Data and Materials” section of your manuscript.</p> <p>Have you have met the above requirement as detailed in our <a href="#">Minimum Standards Reporting Checklist</a>?</p> | <p>Yes</p> |

# 1 The GenTree Platform: growth traits and tree-level 2 environmental data in twelve European forest tree 3 species

4 Opgenoorth, Lars<sup>1,2</sup>, Dauphin, Benjamin<sup>2</sup>, Benavides, Raquel<sup>3</sup>, Heer, Katrin<sup>1</sup>, Alizoti, Paraskevi<sup>4</sup>,  
5 Martínez-Sancho, Elisabet<sup>2</sup>, Alía, Ricardo<sup>5</sup>, Ambrosio, Olivier<sup>6</sup>, Audrey, Albet<sup>7</sup>, Auñón, Francisco<sup>5</sup>,  
6 Avanzi, Camilla<sup>8</sup>, Avramidou, Evangelia<sup>4</sup>, Bagnoli, Francesca<sup>8</sup>, Barbas, Evangelos<sup>4</sup>, Bastias, Cristina  
7 C.<sup>9</sup>, Bastien, Catherine<sup>10</sup>, Ballesteros, Eduardo<sup>5</sup>, Beffa, Giorgia<sup>2</sup>, Bernier, Frédéric<sup>7</sup>, Bigalet, Henri<sup>7</sup>,  
8 Bodineau, Guillaume<sup>11</sup>, Bouic, Damien<sup>7</sup>, Brodbeck, Sabine<sup>2</sup>, Brunetto, William<sup>6</sup>, Buchovska, Jurata<sup>12</sup>,  
9 Buy, Melanie<sup>6</sup>, Cabanillas-Saldaña, Ana M.<sup>13</sup>, Carvalho, Bárbara<sup>3</sup>, Cheval, Nicolas<sup>7</sup>, Climent, José  
10 M.<sup>5</sup>, Correard, Marianne<sup>6</sup>, Cremer, Eva<sup>14</sup>, Danusevičius, Darius<sup>12</sup>, Del Caño, Fernando<sup>5</sup>, Denou, Jean-  
11 Luc<sup>7</sup>, di Gerardi, Nicolas<sup>2</sup>, Dokhelar, Bernard<sup>7</sup>, Ducouso, Alexis<sup>15</sup>, Eskild Nilsen, Anne<sup>16</sup>,  
12 Farsakoglou, Anna-Maria<sup>4</sup>, Fonti, Patrick<sup>2</sup>, Ganopoulos, Ioannis<sup>17</sup>, García del Barrio, José M.<sup>5</sup>, Gilg,  
13 Olivier<sup>6</sup>, González-Martínez, Santiago C.<sup>7</sup>, Graf, René<sup>2</sup>, Gray, Alan<sup>18</sup>, Grivet, Delphine<sup>5</sup>, Gugerli,  
14 Felix<sup>2</sup>, Hartleitner, Christoph<sup>19</sup>, Hollenbach, Enja<sup>1</sup>, Hurel, Agathe<sup>7</sup>, Issehut, Bernard<sup>7</sup>, Jean, Florence<sup>6</sup>,  
15 Jorge, Veronique<sup>20</sup>, Jouineau, Arnaud<sup>6</sup>, Kappner, Jan-Philipp<sup>1</sup>, Kärkkäinen, Katri<sup>21</sup>, Kesälähti,  
16 Robert<sup>22</sup>, Knutzen, Florian<sup>14</sup>, Kujala, Sonja T<sup>21</sup>, Kumpula, Timo A<sup>22</sup>, Labriola, Mariaceleste<sup>8</sup>, Lalanne,  
17 Celine<sup>15</sup>, Lambertz, Johannes<sup>1</sup>, Lascoux, Martin<sup>23</sup>, Lejeune, Vincent<sup>11</sup>, Le-Provost, Gregoire<sup>15</sup>,  
18 Levillain, Joseph<sup>24</sup>, Liesebach, Mirko<sup>25</sup>, López-Quiroga, David<sup>3</sup>, Meier, Benjamin<sup>2</sup>, Malliarou, Ermioni<sup>4</sup>,  
19 Marchon, Jérémy<sup>2</sup>, Mariotte, Nicolas<sup>6</sup>, Mas, Antonio<sup>3</sup>, Matesanz, Silvia<sup>26</sup>, Meischner, Helge<sup>1</sup>,  
20 Michotey, Célia<sup>27</sup>, Milesi, Pascal<sup>28</sup>, Morganti, Sandro<sup>2</sup>, Nievergelt, Daniel<sup>2</sup>, Notivol, Eduardo<sup>29</sup>,  
21 Ostreng, Geir<sup>16</sup>, Pakull, Birte<sup>25</sup>, Perry, Annika<sup>18</sup>, Piotti, Andrea<sup>8</sup>, Plomion, Christophe<sup>15</sup>, Poinot,  
22 Nicolas<sup>7</sup>, Pringarbe, Mehdi<sup>6</sup>, Puzos, Luc<sup>7</sup>, Pyhäjärvi, Tanja<sup>22</sup>, Raffin, Annie<sup>7</sup>, Ramírez-Valiente, José  
23 A.<sup>5</sup>, Rellstab, Christian<sup>2</sup>, Remi, Dourthe<sup>7</sup>, Richter, Sebastian<sup>1</sup>, Robledo-Arnuncio, Juan J.<sup>5</sup>, San  
24 Segundo, Sergio<sup>5</sup>, Savolainen, Outi<sup>22</sup>, Schneck, Volker<sup>30</sup>, Scotti, Ivan<sup>6</sup>, Semerikov, Vladimir<sup>31</sup>, Slámová,  
25 Lenka<sup>2</sup>, Sønstebø, Jørn Henrik<sup>16</sup>, Spanu, Ilaria<sup>8</sup>, Thevenet, Jean<sup>6</sup>, Tollefsrud, Mari Mette<sup>16</sup>, Turion,  
26 Norbert<sup>6</sup>, Vendramin, Giovanni Giuseppe<sup>8</sup>, Villar, Marc<sup>20</sup>, von Arx, Georg<sup>2</sup>, Westin, Johan<sup>32</sup>,  
27 Fady, Bruno<sup>6</sup>, Myking, Tor<sup>16</sup>, Valladares, Fernando<sup>3</sup>, Aravanopoulos, Filippos A.<sup>4</sup>, Cavers, Stephen<sup>18</sup>  
28 <sup>1</sup>Philipps University Marburg, Faculty of Biology, Karl-von-Frisch Strasse 8, 35043 Marburg, Germany  
29 <sup>2</sup>Swiss Federal Research Institute WSL, Zürcherstrasse 111, 8903, Birmensdorf, Switzerland  
30 <sup>3</sup>LINCGlobal, Department of Biogeography and Global Change, Museo Nacional de Ciencias  
31 Naturales, CSIC, Serrano 115 dpdo, 28006, Madrid, Spain  
32 <sup>4</sup>Aristotle University of Thessaloniki, School of Forestry and Natural Environment, Laboratory of  
33 Forest Genetics and Tree Improvement, 54124 Thessaloniki, Greece  
34 <sup>5</sup>Instituto Nacional de Investigación y Tecnología Agraria y Alimentaria - Centro de Investigación  
35 Forestal (INIA-CIFOR), Ctra. de la Coruña km 7.5, 28040, Madrid, Spain  
36 <sup>6</sup>Institut National de Recherche en Agriculture, Alimentation et Environment (INRAE), Domaine Saint  
37 Paul, Site Agroparc, 84914, Avignon, France  
38 <sup>7</sup>Institut National de Recherche en Agriculture, Alimentation et Environment (INRAE), UEFP, 33610  
39 Cestas, France  
40 <sup>8</sup>Institute of Biosciences and BioResources, National Research Council (CNR), via Madonna del  
41 Piano 10, 50019, Sesto, Fiorentino, Italy  
42 <sup>9</sup>Centre d'Ecologie Fonctionnelle et Evolutive (CEFE), CNRS, UMR 5175, Montpellier, France  
43 <sup>10</sup>Institut National de Recherche en Agriculture, Alimentation et Environment (INRAE), Dept ECOFA,  
44 F-45075 Orléans, France  
45 <sup>11</sup>Institut National de Recherche en Agriculture, Alimentation et Environment (INRAE), GBFOR, 45075  
46 Orléans, France  
47 <sup>12</sup>Vytautas Magnus University, Studentu Street 11, 53361, Akademija, Lithuania.  
48 <sup>13</sup>Departamento de Agricultura, Ganadería y Medio Ambiente, Gobierno de Aragón, P. M<sup>a</sup> Agustín 36,  
49 50071 Zaragoza, Spain  
50 <sup>14</sup>Bavarian Institute for Forest Genetics, Forstamtsplatz 1, 83317 Teisendorf, Germany

51 <sup>15</sup>INRAE, Univ. Bordeaux, BIOGECO, F-33770 Cestas, France  
52 <sup>16</sup>Division of Forestry and Forest Resources, Norwegian Institute of Bioeconomy Research (NIBIO),  
53 P.O. Box 115, 1431, Ås, Norway  
54 <sup>17</sup>Institute of Plant Breeding and Genetic Resources, Hellenic Agricultural Organization DEMETER (ex  
55 NAGREF), Thermi, 57001, Greece  
56 <sup>18</sup>UK Centre for Ecology and Hydrology, Bush Estate Penicuik, EH26 0QB, United Kingdom  
57 <sup>19</sup>LIECO GmbH & Co KG  
58 <sup>20</sup>Institut National de Recherche en Agriculture, Alimentation et Environment (INRAE), ONF,  
59 BIOFORA, 45075 Orléans, France  
60 <sup>21</sup>Natural Resources Institute Finland, Paavo Havaksentie 3, 90014, University of Oulu, Finland  
61 <sup>22</sup>University of Oulu, Pentti Kaiteran katu 1, 90014, University of Oulu, Finland  
62 <sup>23</sup>Department of Ecology & Genetics, EBC, Uppsala University, Norbyvägen 18D, 75236, Uppsala,  
63 Sweden  
64 <sup>24</sup>Université de Lorraine, AgroParisTech, INRAE, SILVA, 54000 Nancy, France  
65 <sup>25</sup>Thünen Institute of Forest Genetics, Sieker Landstr. 2, Grosshansdorf, 22927, Germany  
66 <sup>26</sup>Área de Biodiversidad y Conservación, Universidad Rey Juan Carlos, Calle Tulipán s/n, 28933,  
67 Móstoles, Spain  
68 <sup>27</sup>Institut National de Recherche en Agriculture, Alimentation et Environment (INRAE), URGI,  
69 Versailles, France  
70 <sup>28</sup>Department of Ecology & Genetics, EBC, Science for Life Laboratory, Uppsala University, Uppsala,  
71 Sweden  
72 <sup>29</sup>Centro de Investigación y Tecnología Agroalimentaria de Aragón - Unidad de Recursos Forestales  
73 (CITA), Avda. Montañana 930, 50059, Zaragoza, Spain  
74 <sup>30</sup>Thünen Institute of Forest Genetics, Eberswalder Chaussee 3a, Waldsiedersdorf, 15377, Germany  
75 <sup>31</sup>Institute of Plant and Animal Ecology, Ural branch of RAS, 8 Marta St. 202, 620144, Ekaterinburg,  
76 Russia  
77 <sup>32</sup>Skogforsk, Tomterna 1, 918 21 Sävar, Sweden  
78  
79 [opgenoorth@uni-marburg.de](mailto:opgenoorth@uni-marburg.de); [lars.opgenoorth@wsl.ch](mailto:lars.opgenoorth@wsl.ch)  
80 [benjamin.dauphin@wsl.ch](mailto:benjamin.dauphin@wsl.ch)  
81 [rbenavidescalvo@gmail.com](mailto:rbenavidescalvo@gmail.com)  
82 [katrin.heer@uni-marburg.de](mailto:katrin.heer@uni-marburg.de)  
83 [alizotp@for.auth.gr](mailto:alizotp@for.auth.gr)  
84 [elisabet.martinez@wsl.ch](mailto:elisabet.martinez@wsl.ch)  
85 [alia@inia.es](mailto:alia@inia.es)  
86 [olivier.ambrosio@inrae.fr](mailto:olivier.ambrosio@inrae.fr)  
87 [audrey.albet.1@inrae.fr](mailto:audrey.albet.1@inrae.fr)  
88 [aunon.francisco@inia.es](mailto:aunon.francisco@inia.es)  
89 [camilla.avanzi@ibbr.cnr.it](mailto:camilla.avanzi@ibbr.cnr.it)  
90 [aevaggelia@yahoo.com](mailto:aevaggelia@yahoo.com)  
91 [francesca.bagnoli@ibbr.cnr.it](mailto:francesca.bagnoli@ibbr.cnr.it)  
92 [vbarbas@for.auth.gr](mailto:vbarbas@for.auth.gr)  
93 [crbasc@gmail.com](mailto:crbasc@gmail.com)  
94 [catherine.bastien@inrae.fr](mailto:catherine.bastien@inrae.fr)  
95 [eduardo.ballesteros@inia.es](mailto:eduardo.ballesteros@inia.es)  
96 [giorgia.beffa@gmail.com](mailto:giorgia.beffa@gmail.com)  
97 [frederic.bernier@inrae.fr](mailto:frederic.bernier@inrae.fr)  
98 [henri.bignalet@inrae.fr](mailto:henri.bignalet@inrae.fr)  
99 [guillaume.bodineau@inrae.fr](mailto:guillaume.bodineau@inrae.fr)  
100 [damien.bouic@inrae.fr](mailto:damien.bouic@inrae.fr)  
101 [sabine.brodbeck@wsl.ch](mailto:sabine.brodbeck@wsl.ch)  
102 [william.brunetto@inrae.fr](mailto:william.brunetto@inrae.fr)

103 jurata.buchovska@vdu.lt  
104 Melanie.Buy@inrae.fr  
105 acabanillas@aragon.es  
106 babic.barbosa@gmail.com  
107 nicolas.cheval@inrae.fr  
108 climent@inia.es  
109 marianne.correard@inrae.fr  
110 Eva.Cremer@awg.bayern.de  
111 darius.danusevicius@vdu.lt  
112 umgf@inia.es  
113 jean-luc.denou@inrae.fr  
114 nicolas.degirardi@gmail.com  
115 bernard.dokhelar@inrae.fr  
116 alexis.ducouso@inrae.fr  
117 anne.eskild.nilsen@nibio.no  
118 amfarsakoglou@gmail.com  
119 patrick.fonti@wsl.ch  
120 giannis.ganopoulos@gmail.com  
121 jmgarcia@inia.es  
122 olivier.gilg@inrae.fr  
123 santiago.gonzalez-martinez@inrae.fr  
124 rene.graf@wsl.ch  
125 alangray@ceh.ac.uk  
126 dgrivet@inia.es  
127 felix.gugerli@wsl.ch  
128 hartleitner@sfl.at  
129 Hollenb4@students.uni-marburg.de  
130 agathe.hurel@inrae.fr  
131 bernard.issenhuth@inrae.fr  
132 florence.jean@inrae.fr  
133 veronique.jorge@inrae.fr  
134 arnaud.jouineau@inrae.fr  
135 kappnerj@students.uni-marburg.de  
136 katri.karkkainen@luke.fi  
137 robert.kesalahti@oulu.fi  
138 FAKnutzen@gmail.com  
139 sonja.kujala@luke.fi  
140 timo.kumpula@oulu.fi  
141 mclabriola@gmail.com  
142 celine.lalanne@inrae.fr  
143 Lambertj@students.uni-marburg.de  
144 martin.lascoux@ebc.uu.se  
145 vincent.lejeune@inrae.fr  
146 gregoire.le-provost@inrae.fr  
147 joseph.levillain@inrae.fr  
148 mirko.liesebach@thuenen.de  
149 david.quiroga@csic.es  
150 meier.benjamin@outlook.com  
151 ermionimalliarou@yahoo.gr  
152 jeremy.marchon@romandie.ch  
153 nicolas.mariotte@inrae.fr  
154 antonio.mas@mncn.csic.es

155 silvia.matesanzgarcia@gmail.com  
156 helgem@posteo.de  
157 celia.michotey@inrae.fr  
158 pascal.milesi@scilifelab.uu.se  
159 msandro@posteo.ch  
160 daniel.nievergelt@wsl.ch  
161 enotivol@cita-aragon.es  
162 geir.ostreng@nibio.no  
163 birte.pakull@thuenen.de  
164 annt@ceh.ac.uk  
165 andrea.piotti@ibbr.cnr.it  
166 christophe.plomion@inrae.fr  
167 nicolas.poinot@inrae.fr  
168 mehdi.pringarbe@inrae.fr  
169 luc.puzos@inrae.fr  
170 tanja.pyhajarvi@oulu.fi  
171 annie.raffin@inrae.fr  
172 josealberto.ramirezvaliente@gmail.com  
173 christian.rellstab@wsl.ch  
174 remi.dourthe@inrae.fr  
175 richte3d@staff.uni-marburg.de  
176 jjrobledo@gmail.com  
177 sergio.sansegundo@inia.es  
178 outi.savolainen@oulu.fi  
179 volker.schneck@thuenen.de  
180 ivan.scotti@inrae.fr  
181 semerikov@ipae.uran.ru  
182 lenka.mateju@wsl.ch  
183 jorn.sonstebo@nmbu.no  
184 ilaria.spanu@ibbr.cnr.it  
185 jean.thevenet@inrae.fr  
186 Mari.Mette.Tollefsrud@nibio.no  
187 Norbert.Turion@inrae.fr  
188 giovanni.vendramin@ibbr.cnr.it  
189 marc.villar@inrae.fr  
190 georg.vonarx@wsl.ch  
191 johan.westin@skogforsk.se  
192 bruno.fady@inrae.fr  
193 tor.myking@nibio.no  
194 valladares@ccma.csic.es  
195 aravanop@auth.gr  
196 scav@ceh.ac.uk  
197  
198 Corresponding authors: opgenoorth@uni-marburg.de, benjamin.dauphin@wsl.ch, scav@ceh.ac.uk

## 199 Abstract

### 200 **Background:**

201 Progress in the field of evolutionary forest ecology has been hampered by the huge  
202 challenge of phenotyping trees across their ranges in their natural environments, and the  
203 limitation in high-resolution environmental information.

### 204 **Findings:**

205 The GenTree Platform contains phenotypic and environmental data from 4,959 trees from  
206 twelve ecologically and economically important European forest tree species: *Abies alba*  
207 Mill. (silver fir), *Betula pendula* Roth. (silver birch), *Fagus sylvatica* L. (European beech),  
208 *Picea abies* (L.) H. Karst (Norway spruce), *Pinus cembra* L. (Swiss stone pine), *Pinus*  
209 *halepensis* Mill. (Aleppo pine), *Pinus nigra* Arnold (European black pine), *Pinus pinaster*  
210 Aiton (maritime pine), *Pinus sylvestris* L. (Scots pine), *Populus nigra* L. (European black  
211 poplar), *Taxus baccata* L. (English yew), and *Quercus petraea* (Matt.) Liebl. (sessile oak).  
212 Phenotypic (height, diameter at breast height, crown-size, bark-thickness, biomass,  
213 straightness, forking, branch angle, fructification), regeneration, environmental in-situ  
214 measurements (soil depth, vegetation cover, competition indices), and environmental  
215 modeling data extracted by using bilinear interpolation accounting for surrounding conditions  
216 of each tree (precipitation, temperature, insolation, drought indices) were obtained from trees  
217 in 194 sites covering the species' geographic ranges and reflecting local environmental  
218 gradients.

### 219 **Conclusion:**

220 The GenTree Platform is a new resource for investigating ecological and evolutionary  
221 processes in forest trees. The coherent phenotyping and environmental characterization  
222 across 12 species in their European ranges allows for a wide range of analyses from forest  
223 ecologists, conservationists and macro-ecologists. In addition, the data here presented can  
224 be linked to the GenTree Dendroecological collection, the GenTree Leaf Trait collection, and  
225 the GenTree Genomic collection presented elsewhere, that together build the largest  
226 evolutionary forest ecology data collection available.

|                                |                                                                                                                                                                                                                                                                                       |
|--------------------------------|---------------------------------------------------------------------------------------------------------------------------------------------------------------------------------------------------------------------------------------------------------------------------------------|
| Measurements                   | vegetation cover • rock cover • soil depth • competition index • regeneration • diameter at breast height • height • crown size • bark thickness • number of fruits • stem straightness • branch angle • forking index                                                                |
| Technology Type(s)             | bark gauges • calculations • caliper • clinometer • GPS device • increment corer • laser distance measurement • telescopic measuring pole                                                                                                                                             |
| Factor Type(s)                 | tree species                                                                                                                                                                                                                                                                          |
| Sample Characteristic Organism | <i>Abies alba</i> • <i>Betula pendula</i> • <i>Fagus sylvatica</i> • <i>Picea abies</i> • <i>Pinus cembra</i> • <i>Pinus halepensis</i> • <i>Pinus nigra</i> • <i>Pinus pinaster</i> • <i>Pinus sylvestris</i> • <i>Populus nigra</i> • <i>Taxus baccata</i> • <i>Quercus petraea</i> |
| Sample Characteristic Location | Europe                                                                                                                                                                                                                                                                                |

228 Machine-accessible metadata file describing the reported data:

## 229 Keywords

230 Regeneration, DBH, height, crown-size, bark-thickness, fruit-number, stem-straightness,  
231 branch-angle, forking-index, soil-depth

## 232 Context

233 The impacts of climate change and land-use change on forests are already severe, as  
234 observed, for example, following the extreme summer drought of 2018 that triggered a  
235 massive increase in mortality in Central European forests<sup>1</sup>. Furthermore, changes are  
236 expected to be acute in the future, altering distribution ranges and ecosystem functioning, as  
237 well as the interactions among species<sup>2</sup>. Forecasts indicate that near-surface temperature  
238 will shift poleward at mean rates of 80-430 m yr<sup>-1</sup> for temperate forests during the 21<sup>st</sup>  
239 century<sup>3</sup>. This translates into northward shifts of trees' bioclimatic envelopes from 300 to  
240 800 km within one century<sup>3</sup>. More importantly, the frequency and intensity of drought  
241 events, heat waves, forest fires and pest outbreaks<sup>4</sup> are expected to increase.

242 In the light of these changes, species and forest ecosystem resilience will depend on the  
243 extent and structure of phenotypic plasticity, genetic variation and adaptive potential, as well



244 as dispersal ability. From results of extensive networks of field experiments (provenance  
245 trials), it has long been shown that tree species are locally adapted at multiple spatial scales.  
246 In Europe, where most tree populations have established following post-glacial  
247 recolonization, such patterns of local adaptation must have developed rapidly and despite  
248 long generation time and extensive gene flow <sup>5</sup>, a process enabled by high levels of within-  
249 population plasticity, genetic and epigenetic variation, and large population sizes <sup>6</sup>. Recent  
250 work has shown that genetic variation for stress response may be strongly structured along  
251 environmental gradients, such as water availability <sup>7</sup>, temperature <sup>8</sup>, or photoperiod <sup>9</sup>.  
252 However, the spatial patterns of current adaptation in particular phenotypic traits are only  
253 partly informative regarding the potential for future adaptation under a changing climate. To  
254 advance our understanding of the adaptive potential of trees, it is crucial to evaluate multiple  
255 traits in parallel to be able to model their putative response to new environmental conditions.

256 Recently, substantial effort has been made to identify specific genes and gene combinations  
257 that have undergone selection, by associating mutations at candidate loci with phenotypes  
258 related to stress events <sup>10,11</sup> or with environmental variables <sup>12</sup>. This latter example by  
259 Yeaman and co-workers <sup>12</sup> is one of the first association studies in forest tree species on a  
260 large genomic scale and the first to investigate convergent local adaptation in distantly  
261 related tree species. However, progress in this field has been hampered by limited genomic  
262 resources, the lack of small-scale, individual tree-level environmental information <sup>13</sup>, and the  
263 huge challenge of phenotyping trees in their natural environments <sup>14,15</sup>.

264 The GenTree Platform aims to address these challenges by providing individual level, high-  
265 resolution phenotypic and environmental data for a set of up to 20 sampling sites for each of  
266 twelve ecologically and economically important forest tree species across Europe. For a  
267 subset of seven species (*B. pendula*, *F. sylvatica*, *P. abies*, *P. pinaster*, *P. sylvestris*,  
268 *Populus nigra*, and *Q.petraea*), the sampling of sites was carried out in pairs, i.e. contained

269 two stands that were close enough to be connected by gene flow but situated in contrasting  
270 environments.

271 The sampling design described here was used for collecting phenotypic traits and ecological  
272 data. In addition, tree ring and wood density measurements for the same trees were  
273 assessed <sup>16</sup>, and datasets on leaf traits, including specific leaf area (SLA) and isotopic  
274 content <sup>17</sup>, and high-density single nucleotide polymorphism (SNP) data for each tree, were  
275 established, that will be published in GeneBank. All data and metadata information are  
276 gathered in the GnpIS repository  
277 (<https://urgi.versailles.inra.fr/ephegis/ephegis/viewer.do#dataResults/trialSetIds=27>) which  
278 makes updates possible<sup>18</sup>.

279 We investigated the extent to which other datasets comparable to the data presented here  
280 exist by screening our twelve species in the TRY Plant Trait Data Base, the ITDRB, and the  
281 biomass and allometry data base for woody plants (BAAD). While this is a systematic  
282 approach, it leaves out a large number of tree species and therefore we cannot claim to  
283 have a comprehensive overview of the existing data. However, all three databases are large  
284 collections that include at least some of the tree measurements we present. Even though  
285 these are tremendous resources, the major difference is that based on their nature as  
286 collecting points of numerous independent datasets, there is no coherent sampling scheme  
287 in these collections as such, meaning that the number of trees per site, the way of tree  
288 selection, measured phenotypes, and provided environmental information vary greatly and  
289 therefore do not allow for coherent comparative analyses such as those of the GenTree  
290 Platform. For example, BAAD reports DBH data for only four of the species presented here,  
291 namely *Betula pendula* with three populations, *Fagus sylvatica* with two populations, *Picea*  
292 *abies* with four populations, and *Pinus sylvestris* with ten populations. In the larger TRY  
293 database, all of our species are represented, but the variability of sampling schemes is much  
294 more heterogenous in relation to traits, number of populations per species, and metadata.

295 For example, DBH measurements are being reported 232 times from a total of 12 *Betula*  
296 *pendula* populations. Of these the vast majority of the 170 measurements are from one  
297 population while from many other populations only one or up to five measurements are  
298 reported. Also, the measurements stem from five different original studies and thus having  
299 very different levels of additional information. We conclude that the core value of our  
300 reported data lies in the coherent sampling design and yet large number of sampled  
301 populations and individuals per species.

## 302 Methods

303 All recorded parameters are listed in Table 1.

### 304 **Sampling strategy**

305 To optimize the sampling design for genome scans and association studies, we followed the  
306 recent theoretical work by Lotterhos and Whitlock<sup>19,20</sup>, which indicates that a paired  
307 sampling design has more power to detect the genomic signatures of local adaptation. Using  
308 this framework, populations from across the natural range of a species are sampled in pairs,  
309 with the two sites in each pair situated geographically close enough to be genetically similar  
310 at neutral genes due to a common evolutionary history and ongoing gene flow, but in distinct  
311 selective niches such that the local fitness optimum differs between the two sites. This  
312 sampling confers more power to detect evidence of selection in the genome through either  
313 association with environmental or phenotypic variables or the detection of outliers (e.g. for  
314 genetic differentiation,  $F_{ST}$ ) (ibid.). Trees are very amenable to a pairwise approach since  
315 they are known to be locally adapted, often at fine spatial scales<sup>21,22</sup> and irrespective of  
316 gene flow distances<sup>6</sup>. This strategy was followed for a subset of seven species (see above)  
317 for which genomic resources were available (i.e. full or draft genome).

318 Such local niche contrasts are neither easy to identify nor readily available when  
319 environments are very homogenous. Therefore, a second principle of the sampling design

320 was to cover a large part of each species' natural geographic range (Fig. 1) and  
321 environmental space (Fig. 2) to capture selective niche variation. Finally, sites with a history  
322 of intensive management or any other intense and obvious anthropogenic or natural  
323 disturbances were avoided. This strategy was followed for all the 12 species.

#### 324 **Selection of trees on sites**

325 A minimum of 25 trees were sampled per site to capture the natural phenotypic and genetic  
326 variability. Trees had to be mature but not senescent, dominant or codominant, and had to  
327 show no signs of significant damage due to pests and diseases or generally low vigor.  
328 Sampled trees were at least 30 meters apart and, where possible, were chosen along  
329 several parallel linear transects across each site, typically resulting in 2-4 transects per  
330 sampling site to keep the overall sampling area below 3 hectares.

#### 331 **Site and tree metadata**

332 Sites were labeled by a two-letter country code (ISO 3166-1 alpha-2) followed by a two-letter  
333 species code and a two-digit site number (Table 1). Individual tree labels added another two-  
334 digit tree number. Every tree was permanently labeled so that future studies can resample  
335 subsets or the entire GenTree collection for gaining time-series data of individual traits or to  
336 add new phenotypes to the analyses. Be aware, that permission of the respective  
337 landowners must be obtained prior to sampling. Handheld GPS devices were used to record  
338 the position of each individual tree. The precision of GPS measurements in forests is  
339 notoriously challenging: regular commercial devices achieve an accuracy of about 8-15 m  
340 with good satellite coverage. Given that trees were selected with a minimum distance of 30  
341 m this accuracy was sufficient for the correct positioning of trees relative to each other. An  
342 overall population position was defined by taking the mean value across all the individual  
343 tree measurements. Coordinates were in decimal degrees with 4 decimal units to reflect the  
344 general measurement accuracy (~11.1 m) and were stored in the WGS 84 reference  
345 system. GPS devices were also used to record the tree's elevation, either directly or through

346 post-hoc positioning in digital elevation models. The local aspect at the site of the tree was  
347 measured by compass in five-degree steps in the direction of the steepest slope.

348 The Metadata for each site consists of an ID code (see above), sampling date, location  
349 (GPS coordinates, see above) and elevation in meters above sea level (m a.s.l). Each stand  
350 was also characterized as being monospecific or mixed (in the latter case the most common  
351 co-occurring species was noted), stand structure was noted as single or multiple layered,  
352 and the age distribution as even or uneven (categorical variables).

### 353 **Competition index at tree level**

354 Competition indices were calculated following Canham et al. <sup>23</sup> and Lorimer et al. <sup>24</sup>.

355 Specifically, the first index following Lorimer <sup>24</sup> was calculated as  $NCI = \sum_{i=1}^5 (DBH_j / DBH_i) / dist_i$   
356 that follows the same notation as above, and where  $DBH$  is the  $DBH$  of the subject trees  $j$   
357 and  $i$ .

358 Second, the distance-dependent competition index (NCI) following Canham et al. <sup>23</sup> was

359 computed as  $NCI = \sum_{i=1}^5 (DBH_i / dist_i)$  where  $DBH_i$  is the diameter at breast height of

360 competitor tree  $i$ , and  $dist_i$  is the distance between the subject tree and competitor tree  $i$ .

361 This index assumes that the net effects of neighboring trees vary as a direct function of the

362 size of the neighbors and as an inverse function of the distance. For this purpose, the

363 distance to the five nearest neighbors of each target tree was measured and their respective

364 diameter at breast height was measured.

365 Moreover, it was noted whether competitor trees were conspecific to the target tree or not.

366 Each multi-stemmed tree was considered as a single competitor where each stem larger

367 than 15 cm DBH was measured and added to the sum of means.

### 368 **Environmental characteristics within subplots around each tree**

369 Surrounding each target tree, slope, vegetation cover (without tree cover), and stone content

370 were assessed in a 10 m x 10 m plot. The slope was assessed using a clinometer.  
371 Vegetation and rock cover were estimated in the classes <5%, 5-20%, 20-40%, 40-60%, 60-  
372 80%, 80-95%. Soil depth was estimated at three random points in the quadrat to a maximum  
373 of 60 cm with a pike and was averaged across these three values.

#### 374 **Regeneration**

375 In the same 10 m x 10 m plots, natural regeneration of the target species was assessed  
376 according to the following four classes: absent (no recruit visible), scattered (few/scattered  
377 individuals), grouped (presence of scattered groups within the plot), and abundant (regularly  
378 spread all over the plot) and is indicated in the data base with values from 1-4. As this  
379 method cannot resolve maternity, the results indicate realized fecundity at the stand level.

#### 380 **Growth traits**

##### 381 **DBH (cm)**

382 DBH was measured at a stem height of 1.3 m using either a caliper by measuring two  
383 perpendicular diameters and subsequently taking the average of these two measurements  
384 or by measuring the circumference of the tree using a tape and computing the diameter from  
385 that value. Each measurement was performed to the nearest 0.1 cm. If a tree had more than  
386 one trunk, all of them were measured and the average was recorded.

##### 387 **Height (m)**

388 Height from ground to the top of the crown was measured using a hypsometer (Nikon  
389 forestry Pro Laser), a laser vertex (Haglof Vertex III, Langsele, Sweden) or a Laser Range  
390 Meter (Bosch GLM 50 C, Leinfelden-Echterdingen, Germany). For short trees a telescopic  
391 measuring pole was used. Height was noted to the nearest 0.1 m. To forego errors  
392 introduced by measuring height on sloping ground, height measurements on slopes were  
393 conducted from the same elevation as the tree's base by approaching the tree sideways.  
394 Where this was not possible, a slope correction factor was used.

395 **Crown size (m<sup>2</sup>)**

396 Crown size was measured as the circular and ellipsoid plane area of the crown. For this we  
397 measured two perpendicular crown diameters (canopy 1 and 2) by using a measurement  
398 tape, with the first measurement being made along the longest axis of the crown, from one  
399 edge to the other, and by visually projecting the crown margin onto the ground to the nearest  
400 decimeter. For the ellipse area we calculated  $\left(\frac{d_i}{2}\right) * \left(\frac{d_j}{2}\right) * \pi$  and for the circular area  
401  $(d_i+d_j)/2*\pi$ .

402 **Bark thickness (mm)**

403 For measuring bark thickness, we used bark gauges (Haglof Barktax) or a tape after  
404 extracting the bark with a small caliper (if bark could be detached without tree damage) or  
405 increment borers (Haglof increment borer) in case of strong and thick bark. Five  
406 measurements were taken for each tree at breast height and the average was calculated.  
407 For tree species with a clear dichotomy of bark thickness (e.g. old *Populus nigra*, *T.*  
408 *baccata*), we included at least two measurements from the thinner and thicker bark areas  
409 each.

410 **Number of fruits (units)**

411 In conifers, cones were counted by providing the average of three rounds of counting, made  
412 by an observer on the ground using binoculars. Only mature (brown) and closed cones were  
413 counted, i.e., those containing seeds, and not immature (green) or open cones, whose  
414 seeds had already been dispersed (open cones often stay on the branch for several years  
415 after seeds are dispersed). In broadleaves, the number of fruits was counted for 30 seconds,  
416 repeating the procedure three times to then average the three counts.

417 In case of species with very small fruits that are hard to see individually and in locations with  
418 a very limited view to the canopy, each tree was assigned to one of five categories, namely 0  
419 (no fruits), 1 (a few fruits in a small section of the crown), 2 (a few fruits in two or more

420 sections of the crown), 3 (a lot of fruits in a small section of the crown), and 4 (a lot of fruits  
421 in two or more sections of the crown).

#### 422 **Straightness**

423 Straightness of the stem was classified according to five levels: (1) No straight stem, (2)  
424 moderate or strong bends, (3) slight to moderate bend in different directions, (4) fairly  
425 straight (in one direction slightly crooked), (5) absolutely straight. This was performed on the  
426 lower 15 m of the tree beginning from the ground with the crown not taken into account. In  
427 the case of forked stems, only the trunk below the deepest forking point was evaluated.

#### 428 **Branch angle**

429 Branch angle was classified at two successive whorls according to a five-scale scheme in  
430 conifers with (1)  $<23^\circ$ , (2)  $23-45^\circ$ , (3)  $45-67^\circ$ , (4)  $67-90^\circ$ , (5)  $>90^\circ$ , and a four-scale scheme  
431 in broadleaves omitting the  $>90^\circ$  class. In black poplar, only the top two meters of the crown  
432 were considered.

#### 433 **Forking index**

434 The branching of a tree in two (fork) or more (ramiform) equally thick and long stems was  
435 assessed with a forking index. The index took into account two parameters. First a score for  
436 the relative position of the fork: (4) no forking, (3) forking in the upper third of the tree, (2)  
437 forking in the middle third of the tree, (1) forking in the lower third of the tree; and second the  
438 number of axes (stems). The score of the relative position was then multiplied by ten and  
439 divided by the number of axes.

### 440 **Modelled environmental data extracted for GenTree sites**

441 Topography, soil, and climate data were compiled to characterize environmental conditions  
442 in each GenTree sampling site as follows.



443 **Topography**

444 We used the European digital elevation model to describe topographic conditions at 25 m  
445 spatial resolution with a vertical accuracy of about  $\pm 7$  meters (EU-DEM v. 1.1 from the  
446 Copernicus program; <https://land.copernicus.eu/>). We derived 14 variables (Table 2) based  
447 on biological hypotheses and their informative power at the local scale<sup>25</sup>. We calculated  
448 morphometric, hydrologic, and radiation grids for each GenTree site and visually inspected  
449 data integrity using SAGA 6.2<sup>26</sup> (details in Table 2).

450 **Soil**

451 We collected available data on water capacity at seven soil depths using SoilGrids250m<sup>27</sup>.  
452 We estimated Pearson's correlation coefficients,  $r$ , between soil layers and then averaged  
453 the four first superficial (0, 5, 15, and 30 cm) and the three deeper (60, 100, and 200 cm)  
454 layers that were highly correlated, respectively.

455 **Climate**

456 We extracted climate data with high spatial resolution (30 arcsec) using CHELSA v. 1.2<sup>28</sup>.  
457 CHELSA is based on a quasi-mechanistic statistical downscaling global reanalysis and  
458 global circulation model that, in particular, reliably interpolates the amount of precipitation  
459 using an orographic rainfall and wind effect. The dataset consisted of 48 climatic, 19  
460 bioclimatic, four drought- and two frost-related variables for the reference period 1979-2013  
461 (Table 2; <http://chelsa-climate.org/bioclim/>). We extracted all modeled environmental values  
462 for each individually geo-referenced tree using the *extract* function of the R package  
463 RASTER (Hijmans and van Etten 2016<sup>29</sup>). The surrounding conditions (i.e. adjacent pixels)  
464 of each individual tree were incorporated by the bilinear interpolation method when  
465 extracting the data.

## 466 Data Records

467 The data presented are structured in four independent csv files that can be merged using the  
 468 site identifier (m04.site.id) or tree identifier (m06.tree.id). The same codes can be used to  
 469 merge additional data namely from the GenTree Dendroecological Collection <sup>16</sup>, the  
 470 GenTree Leaf Trait Collection, and the GenTree Genomic Collection (personal  
 471 communication). The first file contains the metadata descriptions, the second the individual  
 472 phenotypic traits, the third the environmental data, and the fourth the modelled  
 473 environmental data. These data files are available at figshare data repository open access  
 474 under a CC0 license (<https://figshare.com/s/4d57474fd63864a6dfd8>). All the data are  
 475 indexed in Table 2.

476 **Table 1** Variables names, explanations, and specifications measured for all 4,959 trees and  
 477 all 194 GenTree sites.

| Variable name                      | Variable explanation          | Specification                                                                                                                                                                                                                                                                                                                          |
|------------------------------------|-------------------------------|----------------------------------------------------------------------------------------------------------------------------------------------------------------------------------------------------------------------------------------------------------------------------------------------------------------------------------------|
| <b>GenTree Platform metadata</b>   |                               |                                                                                                                                                                                                                                                                                                                                        |
| m01.spec                           | Species abbreviations         | <i>Abies Alba</i> [AA], <i>Betula pendula</i> [BP], <i>Fagus sylvatica</i> [FS], <i>Picea abies</i> [PA], <i>Pinus cembra</i> [PC], <i>Pinus halepensis</i> [PH], <i>Pinus nigra</i> [PN], <i>Populus nigra</i> [PO], <i>Pinus pinaster</i> [PP], <i>Pinus sylvestris</i> [PS], <i>Quercus petraea</i> [QP], <i>Taxus baccata</i> [TB] |
| m02.country                        | Country abbreviations         | Isocode 6133-2; Austria [AT], Switzerland [CH], Germany [DE], Spain [ES], Finland [FI], France [FR], Great Britain [GB], Greece [GR], Italy [IT], Lithuania [LT], Norway [NO], Sweden [SE]                                                                                                                                             |
| m03.site.num                       | Site numbers                  | Running numbers of sites per species 01-24                                                                                                                                                                                                                                                                                             |
| m04.site.id                        | Complete site-ID per species  | Merger of m01-m03                                                                                                                                                                                                                                                                                                                      |
| m05.tree.num                       | Tree numbers                  | Running numbers within sites 01-25                                                                                                                                                                                                                                                                                                     |
| m06.tree.id                        | Complete tree ID              | Merger of m01-m03, m05                                                                                                                                                                                                                                                                                                                 |
| m07.trial.name                     | Site name                     |                                                                                                                                                                                                                                                                                                                                        |
| m08.lat                            | Latitude                      | Decimal degrees, WGS84                                                                                                                                                                                                                                                                                                                 |
| m09.lon                            | Longitude                     | Decimal degrees, WGS84                                                                                                                                                                                                                                                                                                                 |
| <b>GenTree Platform phenotypes</b> |                               |                                                                                                                                                                                                                                                                                                                                        |
| p01.height                         | Height                        | Tree height, m                                                                                                                                                                                                                                                                                                                         |
| p02.dbh                            | DBH                           | Diameter at breast height, cm                                                                                                                                                                                                                                                                                                          |
| p03.bark                           | Bark thickness mean           | Mean value of bark thickness, cm                                                                                                                                                                                                                                                                                                       |
| p04.trunk                          | Trunk straightness/flexuosity | 5: absolutely straight, 4: fairly straight (in one direction slightly crooked), 3: slight to moderate bend in different directions, 2: moderate or strong bends, 1: no straight stem                                                                                                                                                   |
| p05.branch                         | Branch angle                  | 1: <23° (steep), 2: 23° - 45°, 3: 45°-67°, 4: 67°-90° (plain), 5: >90°                                                                                                                                                                                                                                                                 |
| p06.fork                           | Forking index                 | 1: fork at the lower third of tree height, 2: fork at middle third, 3: fork at upper third, 4: no fork – multiplied by 10 and then divided by the number of stems                                                                                                                                                                      |
| p07.canopy.1                       | Canopy projection REP 1       | Crown diameter projection, m                                                                                                                                                                                                                                                                                                           |
| p08.canopy.2                       | Canopy projection REP 2       | Crown diameter projection, m                                                                                                                                                                                                                                                                                                           |
| p09.crown.ellipse                  | Crown ellipse                 | Area of an ellipse $(d1/2)*(d2/2)*\pi$ , m <sup>2</sup>                                                                                                                                                                                                                                                                                |
| p10.crown.round                    | Crown size                    | As some only have one diameter, round areas with the mean diameter $((D1+D2/2)/2)^2*\pi$ , m <sup>2</sup>                                                                                                                                                                                                                              |
| p11.regeneration                   | Natural regeneration          | 1: absent, 2: scattered, 3: groups, 4: abundant                                                                                                                                                                                                                                                                                        |
| p12.fruit.mean                     | Fruit/cone number             | Number of fruits.                                                                                                                                                                                                                                                                                                                      |
| p13.basal.area                     |                               |                                                                                                                                                                                                                                                                                                                                        |

| <b>GenTree Platform in-situ environmental measurements</b> |                          |                                                                                                                                                    |
|------------------------------------------------------------|--------------------------|----------------------------------------------------------------------------------------------------------------------------------------------------|
| e01.plant.cover                                            | Total plant cover        | 1: none, 2: little (5-20%), 3: low (20-40%), 4: medium (40-60%), 5: high (60-80%), 6: very high (80-95%), 7: full cover (>95%)                     |
| e02.comp.index.a                                           | Competition index A      | CI assessed following Canham et al 2004, and multi-stems as the sum                                                                                |
| e03.comp.index.b                                           | Competition index B      | CI assessed following Canham et al 2004, and multi-stems assessing the sum of basal areas and then the DBH                                         |
| e04.comp.index.c                                           | Competition index C      | CI assessed following Lorimer 1983, and multi-stems as the sum                                                                                     |
| e05.comp.index.d                                           | Competition index D      | CI assessed following Lorimer 1983, multi-stems assessing the sum of basal areas and then the DBH                                                  |
| e06.status                                                 |                          | Dominant, co-dominant                                                                                                                              |
| e07.elevation                                              | Elevation of the tree    | Meters above sea level                                                                                                                             |
| e08.slope                                                  | Slope at the tree level  | Slope in degrees                                                                                                                                   |
| e09.aspect                                                 | Aspect at the tree level | 0-360°                                                                                                                                             |
| e10.soil.depth                                             | Mean soil depth          | Mean of 3 measures (measurement to a max. depth of 60 cm                                                                                           |
| e11.stone.content                                          | Mean stone content       | Mean of 3 measures (1: none, 2: little (5-20%), 3: low (20-40%), 4: medium (40-60%), 5: high (60-80%), 6: very high (80-95%), 7: full cover (>95%) |
| e12.rock.cover                                             | Total rock cover         | 1: none, 2: little (5-20%), 3: low (20-40%), 4: medium (40-60%), 5: high (60-80%), 6: very high (80-95%), 7: full cover (>95%)                     |

478

479

480 **Table 2** Environmental variable names, explanations, and specifications modelled for all  
481 4959 trees and 194 GenTree sites.

| Variable name                                             | Variable explanation                | Specification                                           |
|-----------------------------------------------------------|-------------------------------------|---------------------------------------------------------|
| <b>GenTree Platform modelled environmental parameters</b> |                                     |                                                         |
| sample                                                    | Sample identification               | unit: none; resolution [m]: none                        |
| country                                                   | Country code                        | unit: none; resolution [m]: none                        |
| countryspecies                                            | Country and species code            | unit: none; resolution [m]: none                        |
| species                                                   | Species code                        | unit: none; resolution [m]: none                        |
| population                                                | Population identification           | unit: none; resolution [m]: none                        |
| latwgs84                                                  | Latitude in WGS84                   | unit: degree; resolution [m]: 25                        |
| lonwgs84                                                  | Longitude in WGS84                  | unit: degree; resolution [m]: 25                        |
| latetrs89                                                 | Latitude in ETRS89                  | unit: degree; resolution [m]: 25                        |
| lonetrs89                                                 | Longitude in ETRS89                 | unit: degree; resolution [m]: 25                        |
| t01alt                                                    | Altitude                            | unit: m; resolution [m]: 25                             |
| t02slp                                                    | Slope                               | unit: degree; resolution [m]: 25                        |
| t03asp                                                    | Eastness                            | unit: degree; resolution [m]: 25                        |
| t04vcu                                                    | Profile curvature                   | unit: degree/m; resolution [m]: 25                      |
| t05hcu                                                    | Horizontal curvature                | unit: degree/m; resolution [m]: 25                      |
| t06ddg                                                    | Downslope distance gradient         | unit: degree; resolution [m]: 25                        |
| t07mpi                                                    | Morphometric protection index       | unit: none; resolution [m]: 25                          |
| t08tpi                                                    | Topographic position index          | unit: none; resolution [m]: 25                          |
| t09vrm                                                    | Vector ruggedness measure           | unit: none; resolution [m]: 25                          |
| t10twi                                                    | Topographic wetness index           | unit: none; resolution [m]: 25                          |
| t11svf                                                    | Sky-view factor                     | unit: none; resolution [m]: 25                          |
| t12sdir                                                   | Potential direct solar radiation    | unit: kJ/m <sup>2</sup> ; resolution [m]: 25            |
| t13sdif                                                   | Potential diffuse solar radiation   | unit: kJ/m <sup>2</sup> ; resolution [m]: 25            |
| t14stot                                                   | Potential total solar radiation     | unit: kJ/m <sup>2</sup> ; resolution [m]: 25            |
| awc15                                                     | Available water capacity (0-30cm)   | unit: %; resolution [m]: 250                            |
| awc140                                                    | Available water capacity (60-200cm) | unit: %; resolution [m]: 250                            |
| bio01                                                     | Yearly mean temperature             | unit: °C/10; resolution [m]: 1000                       |
| bio02                                                     | Mean diurnal range                  | unit: °C/10; resolution [m]: 1000                       |
| bio03                                                     | Isothermality                       | unit: °C/10; resolution [m]: 1000                       |
| bio04                                                     | Temperature seasonality             | unit: °C/10; resolution [m]: 1000                       |
| bio05                                                     | Max temperature of warmest month    | unit: °C/10; resolution [m]: 1000                       |
| bio06                                                     | Min temperature of coldest month    | unit: °C/10; resolution [m]: 1000                       |
| bio07                                                     | Temperature annual range            | unit: °C/10; resolution [m]: 1000                       |
| bio08                                                     | Mean temperature of wettest quarter | unit: °C/10; resolution [m]: 1000                       |
| bio09                                                     | Mean temperature of driest quarter  | unit: °C/10; resolution [m]: 1000                       |
| bio10                                                     | Mean temperature of warmest quarter | unit: °C/10; resolution [m]: 1000                       |
| bio11                                                     | Mean temperature of coldest quarter | unit: °C/10; resolution [m]: 1000                       |
| bio12                                                     | Yearly precipitation sum            | unit: kg m <sup>-2</sup> ; resolution [m]: 1000         |
| bio13                                                     | Precipitation of wettest month      | unit: kg m <sup>-2</sup> ; resolution [m]: 1000         |
| bio14                                                     | Precipitation of driest month       | unit: kg m <sup>-2</sup> ; resolution [m]: 1000         |
| bio15                                                     | Precipitation seasonality           | unit: kg m <sup>-2</sup> ; resolution [m]: 1000         |
| bio16                                                     | Precipitation of wettest quarter    | unit: kg m <sup>-2</sup> ; resolution [m]: 1000         |
| bio17                                                     | Precipitation of driest quarter     | unit: kg m <sup>-2</sup> ; resolution [m]: 1000         |
| bio18                                                     | Precipitation of warmest quarter    | unit: kg m <sup>-2</sup> ; resolution [m]: 1000         |
| bio19                                                     | Precipitation of coldest quarter    | unit: kg m <sup>-2</sup> ; resolution [m]: 1000         |
| gdd                                                       | Growing degree days                 | unit: °C; resolution [m]: 1000                          |
| gsp                                                       | Accumulated precipitation           | unit: kg m <sup>-2</sup> ; resolution [m]: 1000         |
| shc                                                       | Hydrothermic coefficient            | unit: (kg m <sup>-2</sup> /10)/°C; resolution [m]: 1000 |
| rh410                                                     | Relative humidity                   | unit: %; resolution [m]: 1000                           |
| fcf                                                       | Frost change frequency              | unit: number of events; resolution [m]: 1000            |
| nfd                                                       | Number of frost days                | unit: number of days; resolution [m]: 1000              |
| prec01                                                    | Precipitation sum in January        | unit: kg m <sup>-2</sup> ; resolution [m]: 1000         |
| prec02                                                    | Precipitation sum in February       | unit: kg m <sup>-2</sup> ; resolution [m]: 1000         |
| prec03                                                    | Precipitation sum in March          | unit: kg m <sup>-2</sup> ; resolution [m]: 1000         |
| prec04                                                    | Precipitation sum in April          | unit: kg m <sup>-2</sup> ; resolution [m]: 1000         |
| prec05                                                    | Precipitation sum in May            | unit: kg m <sup>-2</sup> ; resolution [m]: 1000         |
| prec06                                                    | Precipitation sum in June           | unit: kg m <sup>-2</sup> ; resolution [m]: 1000         |
| prec07                                                    | Precipitation sum in July           | unit: kg m <sup>-2</sup> ; resolution [m]: 1000         |
| prec08                                                    | Precipitation sum in August         | unit: kg m <sup>-2</sup> ; resolution [m]: 1000         |
| prec09                                                    | Precipitation sum in September      | unit: kg m <sup>-2</sup> ; resolution [m]: 1000         |
| prec10                                                    | Precipitation sum in October        | unit: kg m <sup>-2</sup> ; resolution [m]: 1000         |
| prec11                                                    | Precipitation sum in November       | unit: kg m <sup>-2</sup> ; resolution [m]: 1000         |
| prec12                                                    | Precipitation sum in December       | unit: kg m <sup>-2</sup> ; resolution [m]: 1000         |
| tmean01                                                   | Mean temperature in January         | unit: °C/10; resolution [m]: 1000                       |

|         |                                  |                                   |
|---------|----------------------------------|-----------------------------------|
| tmean02 | Mean temperature in February     | unit: °C/10; resolution [m]: 1000 |
| tmean03 | Mean temperature in March        | unit: °C/10; resolution [m]: 1000 |
| tmean04 | Mean temperature in April        | unit: °C/10; resolution [m]: 1000 |
| tmean05 | Mean temperature in May          | unit: °C/10; resolution [m]: 1000 |
| tmean06 | Mean temperature in June         | unit: °C/10; resolution [m]: 1000 |
| tmean07 | Mean temperature in July         | unit: °C/10; resolution [m]: 1000 |
| tmean08 | Mean temperature in August       | unit: °C/10; resolution [m]: 1000 |
| tmean09 | Mean temperature in September    | unit: °C/10; resolution [m]: 1000 |
| tmean10 | Mean temperature in October      | unit: °C/10; resolution [m]: 1000 |
| tmean11 | Mean temperature in November     | unit: °C/10; resolution [m]: 1000 |
| tmean12 | Mean temperature in December     | unit: °C/10; resolution [m]: 1000 |
| tmin01  | Minimum temperature in January   | unit: °C/10; resolution [m]: 1000 |
| tmin02  | Minimum temperature in February  | unit: °C/10; resolution [m]: 1000 |
| tmin03  | Minimum temperature in March     | unit: °C/10; resolution [m]: 1000 |
| tmin04  | Minimum temperature in April     | unit: °C/10; resolution [m]: 1000 |
| tmin05  | Minimum temperature in May       | unit: °C/10; resolution [m]: 1000 |
| tmin06  | Minimum temperature in June      | unit: °C/10; resolution [m]: 1000 |
| tmin07  | Minimum temperature in July      | unit: °C/10; resolution [m]: 1000 |
| tmin08  | Minimum temperature in August    | unit: °C/10; resolution [m]: 1000 |
| tmin09  | Minimum temperature in September | unit: °C/10; resolution [m]: 1000 |
| tmin10  | Minimum temperature in October   | unit: °C/10; resolution [m]: 1000 |
| tmin11  | Minimum temperature in November  | unit: °C/10; resolution [m]: 1000 |
| tmin12  | Minimum temperature in December  | unit: °C/10; resolution [m]: 1000 |
| tmax01  | Maximum temperature in January   | unit: °C/10; resolution [m]: 1000 |
| tmax02  | Maximum temperature in February  | unit: °C/10; resolution [m]: 1000 |
| tmax03  | Maximum temperature in March     | unit: °C/10; resolution [m]: 1000 |
| tmax04  | Maximum temperature in April     | unit: °C/10; resolution [m]: 1000 |
| tmax05  | Maximum temperature in May       | unit: °C/10; resolution [m]: 1000 |
| tmax06  | Maximum temperature in June      | unit: °C/10; resolution [m]: 1000 |
| tmax07  | Maximum temperature in July      | unit: °C/10; resolution [m]: 1000 |
| tmax08  | Maximum temperature in August    | unit: °C/10; resolution [m]: 1000 |
| tmax09  | Maximum temperature in September | unit: °C/10; resolution [m]: 1000 |
| tmax10  | Maximum temperature in October   | unit: °C/10; resolution [m]: 1000 |
| tmax11  | Maximum temperature in November  | unit: °C/10; resolution [m]: 1000 |
| tmax12  | Maximum temperature in December  | unit: °C/10; resolution [m]: 1000 |

482 The local environmental contrasts varied among species and population pairs, most of which  
483 exhibited variability with respect to elevation, temperature, precipitation, and water  
484 availability. Other local contrasts were based on radiation, soil water capacity, and  
485 topographic wetness index (among others). One special case is *Populus nigra*, a  
486 heliophilous pioneer species found naturally in riverine areas. Given this specific habitat,  
487 local contrasts were largely bound to the distance of the individual trees from the riverbed  
488 and thus for example to ground water access or exposure to variation in the intensity and  
489 frequency of floods.

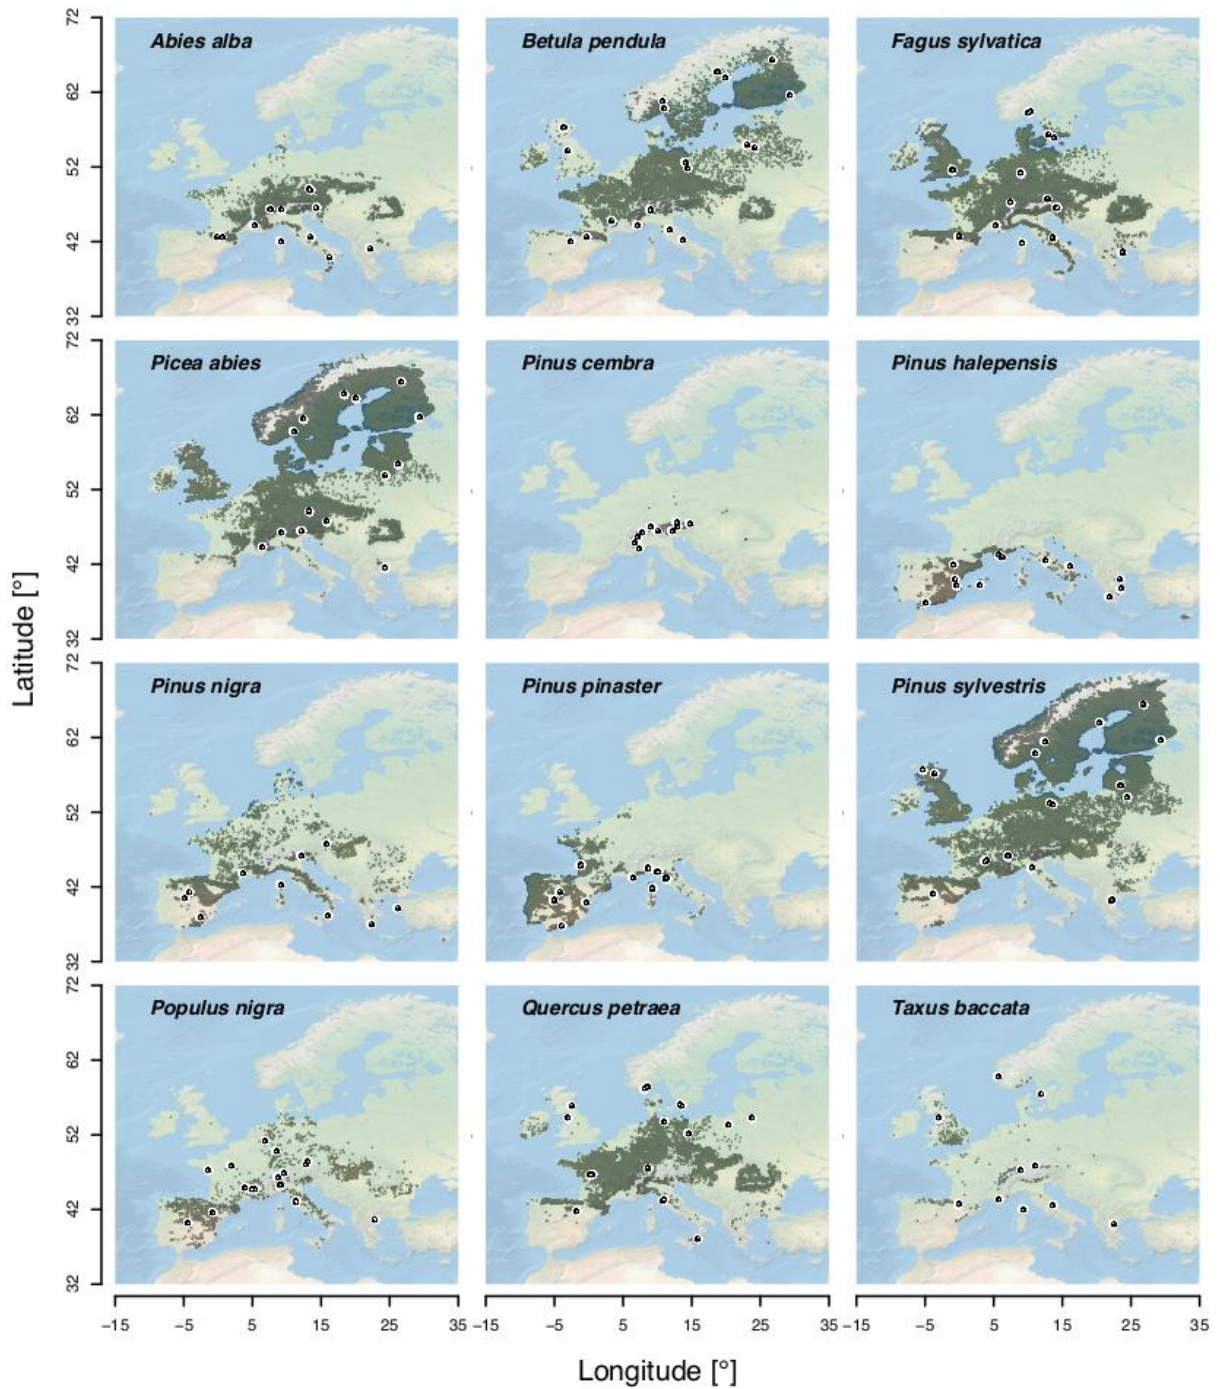

490  
491  
492  
493

**Fig. 1** Sampling sites (black dots) and distributions of the twelve selected tree species (dark green shading) for *in-situ* phenotype measurements. Distribution maps are based on a comprehensive high-resolution tree occurrence dataset from the European Union <sup>30</sup>.

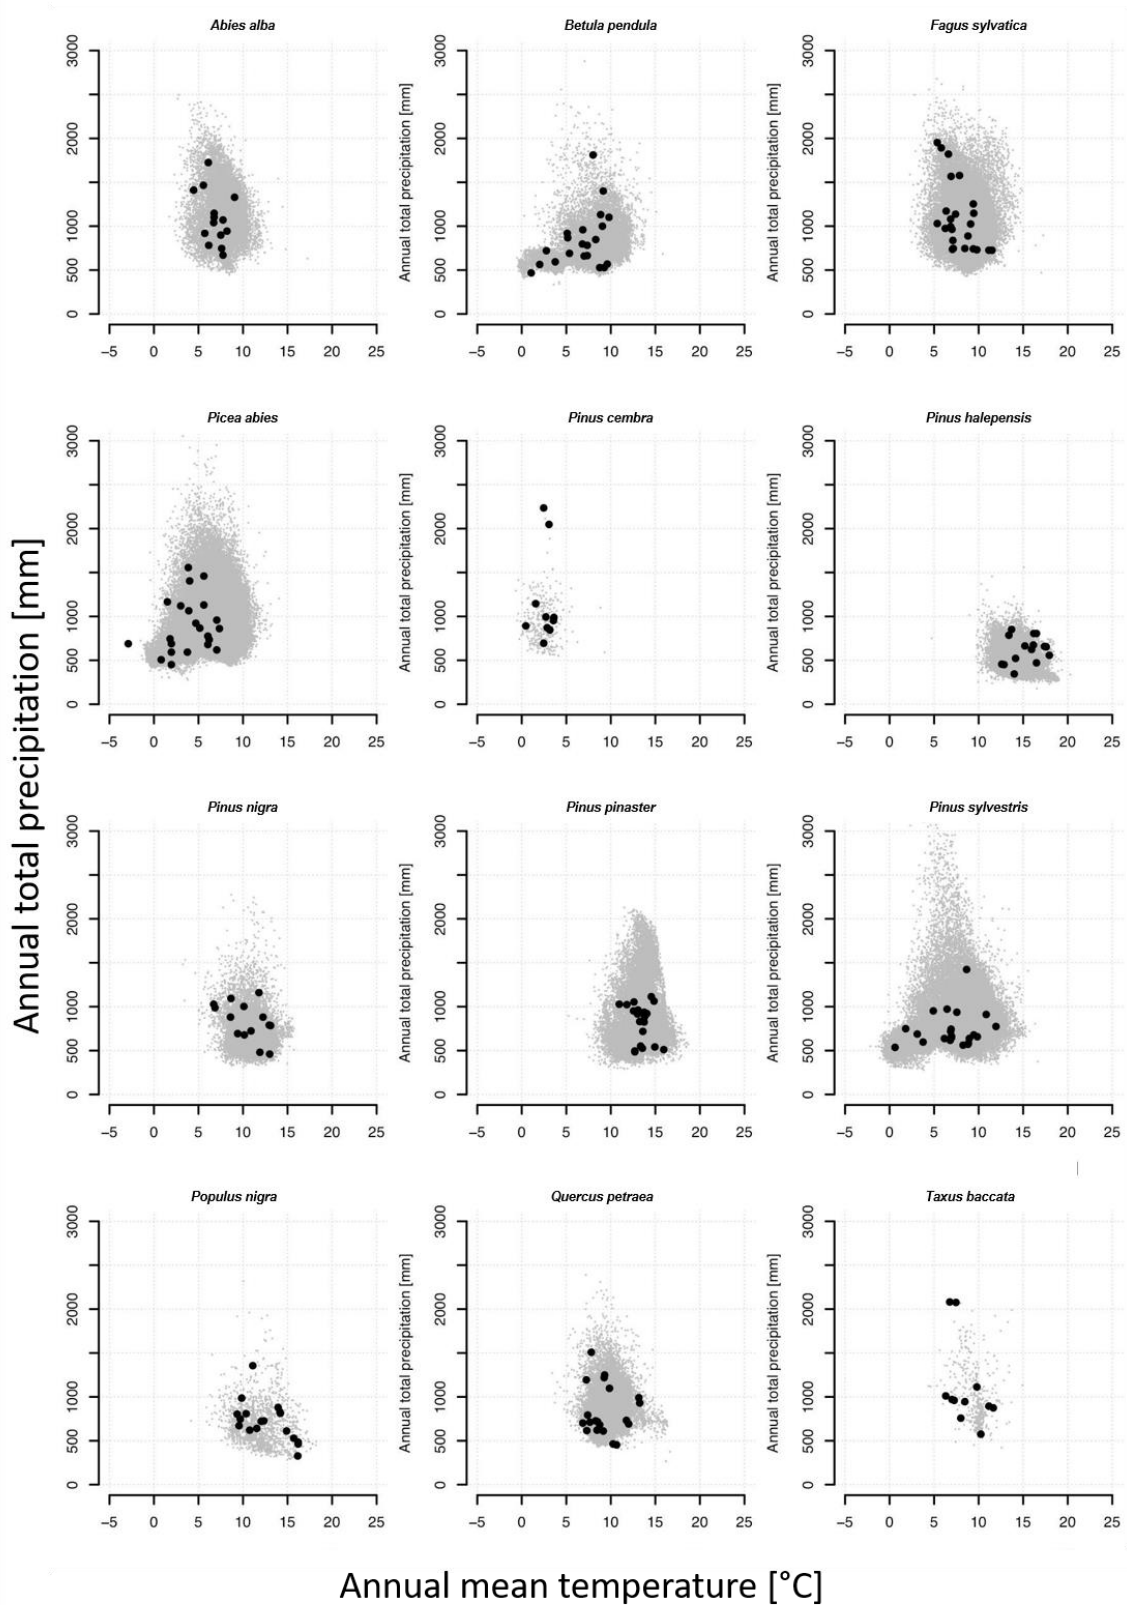

494  
 495  
 496  
 497  
 498

**Fig. 2** Climate-space diagrams for the 12 selected European tree species with annual mean temperature on the x-axis and annual total precipitation on the y-axis. Grey points represent species occurrences based on a comprehensive high-resolution tree occurrence dataset for Europe <sup>30</sup> and black dots indicate the GenTree sites.

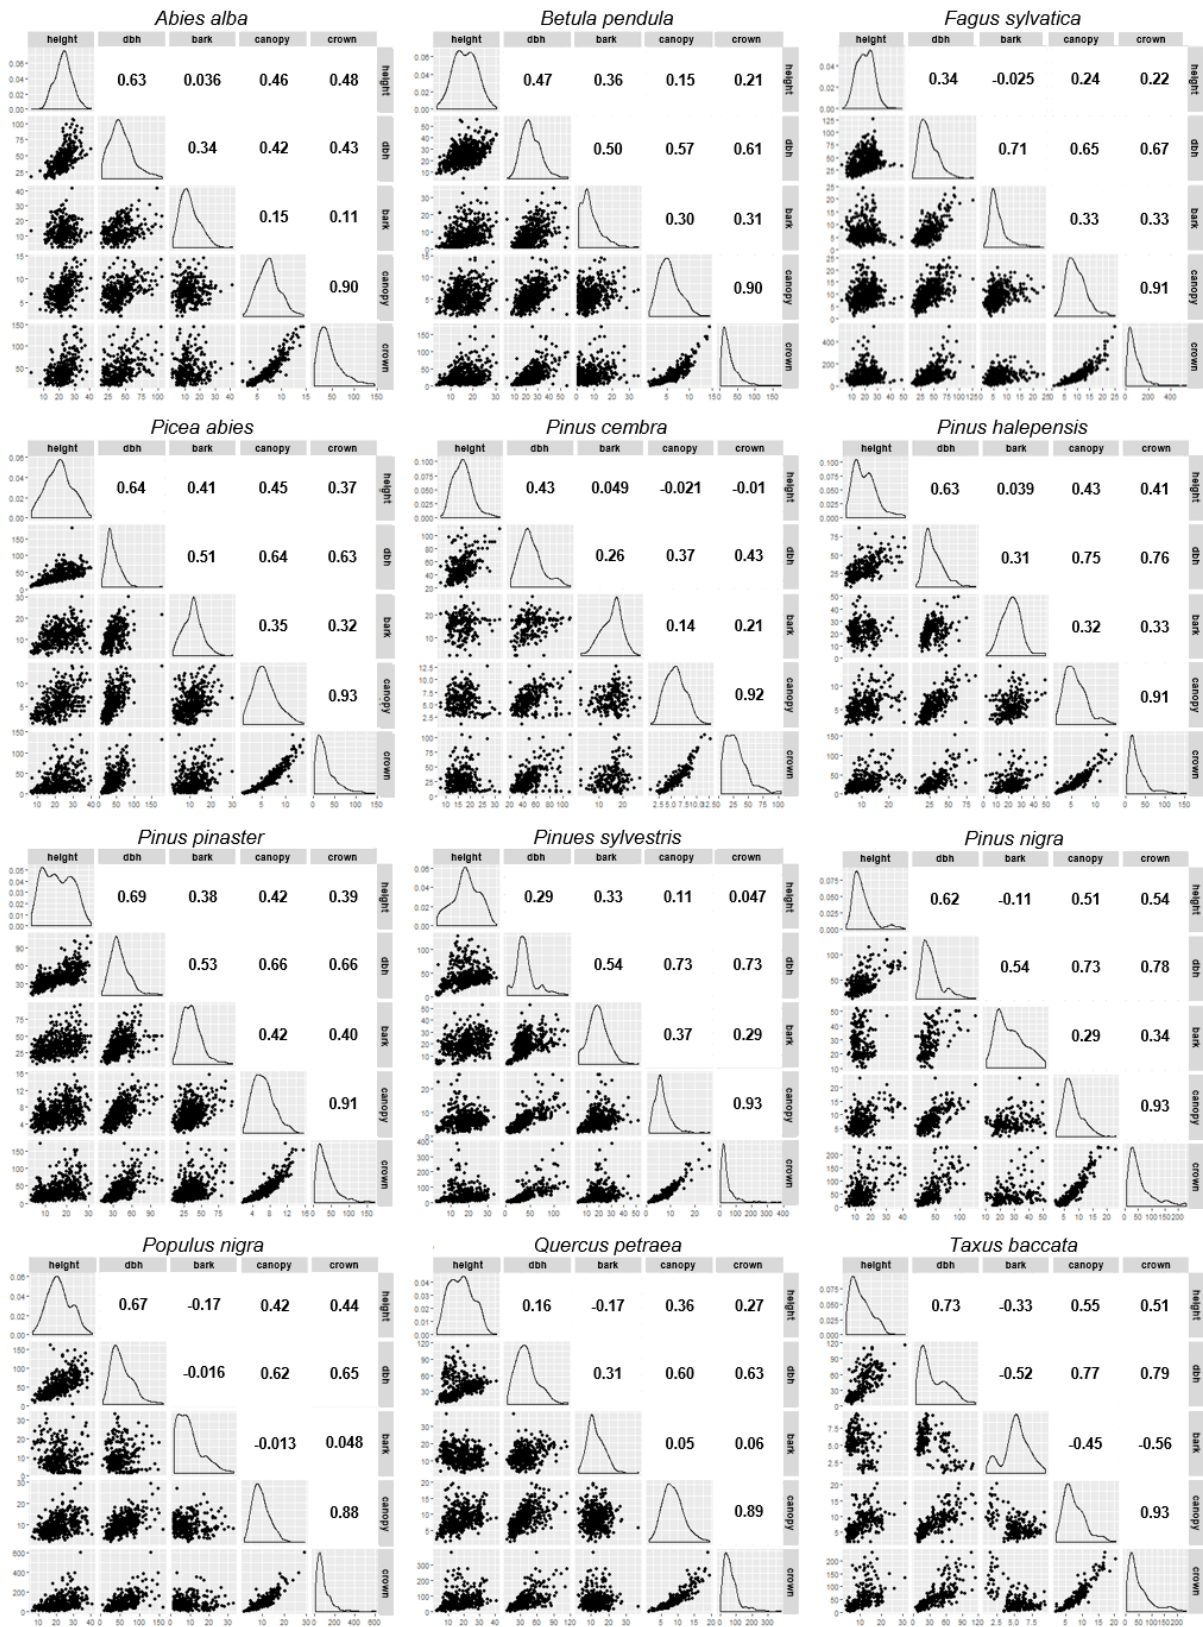

**Fig. 3** Scatterplots, distributions and Pearson's correlation coefficients,  $r$ , of GenTree phenotype measurements in the 12 selected European tree species.

499  
500  
501

502



## 503 Data validation and quality control

504 The database has been checked for consistency at different stages by various researchers  
505 between 2018-2020. Raw data were submitted by all partners to the GnpIS multispecies  
506 integrative information system (<https://urgi.versailles.inra.fr/Tools/GnpIS> ) using preformatted  
507 Microsoft Excel templates. Data files were harmonized, merged and subsequently verified  
508 following several steps:

- 509 1. Missing data and dubious entries were checked manually by examining the original  
510 data files obtained from the partners and by cross-checking cases with field books.
- 511 2. Descriptive statistics were calculated and plotted for all variables including minima,  
512 maxima, means, and variances. Outliers were checked against original data records,  
513 and corrected when necessary.
- 514 3. Covariables were plotted determining whether relationships were reasonable and  
515 following the most complete set of similar relationships (Fig. 3).

## 516 Acknowledgements¶

517 We would like to thank Juri Nievergelt, Anne Verstege, Marina Fonti, Kevin Kleeb, Frederick  
518 Reinig, Enrica Zalloni, Claudio de Sassi, Giacomo Poli for their field assistance. This work  
519 was performed using GnpIS, one of the facilities of the URGI platform  
520 (<https://urgi.versailles.inra.fr/>). We are also grateful to all the forest owners and national  
521 administrations for providing sampling permissions.

## 522 Author contributions¶

523 LO, RB, KH, BF, TM, FV, FAA, SC coordinated sampling design.

524 All authors contributed to sampling design

525 LO, RB, KH, BF, TM, FV, FAA, SC coordinated field sampling.¶

526 All authors contributed to the field sampling.

527 CM, MB compiled and assembled in-situ measurements in the GnpIS database.¶  
528 BD extracted climatic and topographic data and derived environmental indices for all the  
529 sampling sites.¶  
530 RB, LO, BD, PAA, CM curated data, checked quality, and prepared the data sets with  
531 metadata descriptions for sharing and potential reuse.¶  
532 LO, KH, BD, SC, BF wrote the manuscript.¶  
533 BF coordinated GenTree  
534 All authors commented on an earlier version and approved the current version of the  
535 manuscript.

## 536 Competing interests¶

537 The authors declare no competing interest.

## 538 Funding

539 This publication is part of the GenTree project which was funded by the European Union's  
540 Horizon 2020 research and innovation program under grant agreement No. 676876  
541 (GenTree). This work was also supported by the Swiss Secretariat for Education, Research  
542 and Innovation (SERI) under contract No. 6.0032.

## References

- 544 1. Schuldt, B. *et al.* A first assessment of the impact of the extreme 2018 summer drought  
545 on Central European forests. *Basic and Applied Ecology* **45**, 86–103;  
546 10.1016/j.baae.2020.04.003 (2020).
- 547 2. Sitch, S. *et al.* Evaluation of the terrestrial carbon cycle, future plant geography and  
548 climate-carbon cycle feedbacks using five Dynamic Global Vegetation Models (DGVMs).  
549 *Global Change Biology* **14**, 2015–2039; 10.1111/j.1365-2486.2008.01626.x (2008).
- 550 3. Loarie, S. R. *et al.* The velocity of climate change. *Nature* **462**, 1052–1055;  
551 10.1038/nature08649 (2009).
- 552 4. Pachauri, R. K. & Mayer, L. (eds.). *Climate change 2014. Synthesis report*  
553 (Intergovernmental Panel on Climate Change, Geneva, Switzerland, 2015).
- 554 5. Savolainen, O., Pyhäjärvi, T. & Knürr, T. Gene Flow and Local Adaptation in Trees.  
555 *Annu. Rev. Ecol. Evol. Syst.* **38**, 595–619; 10.1146/annurev.ecolsys.38.091206.095646  
556 (2007).
- 557 6. Kremer, A. *et al.* Long-distance gene flow and adaptation of forest trees to rapid climate  
558 change. *Ecology Letters* **15**, 378–392; 10.1111/j.1461-0248.2012.01746.x (2012).
- 559 7. Eveno, E. *et al.* Contrasting patterns of selection at *Pinus pinaster* Ait. Drought stress  
560 candidate genes as revealed by genetic differentiation analyses. *Molecular Biology and*  
561 *Evolution* **25**, 417–437; 10.1093/molbev/msm272 (2008).
- 562 8. Holliday, J. A., Ritland, K. & Aitken, S. N. Widespread, ecologically relevant genetic  
563 markers developed from association mapping of climate-related traits in Sitka spruce  
564 (*Picea sitchensis*). *New Phytologist* **188**, 501–514; 10.1111/j.1469-8137.2010.03380.x  
565 (2010).
- 566 9. Chen, J. *et al.* Clinal variation at phenology-related genes in spruce: parallel evolution in  
567 FTL2 and Gigantea? *Genetics* **197**, 1025–1038; 10.1534/genetics.114.163063 (2014).
- 568 10. González-Martínez, S. C., Ersoz, E., Brown, G. R., Wheeler, N. C. & Neale, D. B. DNA  
569 sequence variation and selection of tag single-nucleotide polymorphisms at candidate  
570 genes for drought-stress response in *Pinus taeda* L. *Genetics* **172**, 1915–1926;  
571 10.1534/genetics.105.047126 (2006).
- 572 11. González-Martínez, S. C., Krutovsky, K. V. & Neale, D. B. Forest-tree population  
573 genomics and adaptive evolution. *New Phytologist* **170**, 227–238; 10.1111/j.1469-  
574 8137.2006.01686.x (2006).
- 575 12. Yeaman, S. *et al.* Convergent local adaptation to climate in distantly related conifers.  
576 *Science (New York, N. Y.)* **353**, 1431–1433; 10.1126/science.aaf7812 (2016).
- 577 13. Scotti, I., González-Martínez, S. C., Budde, K. B. & Lalagüe, H. Fifty years of genetic  
578 studies: what to make of the large amounts of variation found within populations? *Annals*  
579 *of Forest Science* **73**, 69–75; 10.1007/s13595-015-0471-z (2016).
- 580 14. Alexandre, H. *et al.* In situ estimation of genetic variation of functional and ecological  
581 traits in *Quercus petraea* and *Q. robur* (2018).
- 582 15. Dungey, H. S. *et al.* Phenotyping Whole Forests Will Help to Track Genetic Performance.  
583 *Trends in Plant Science* **23**, 854–864; 10.1016/j.tplants.2018.08.005 (2018).

- 584 16. Martínez-Sancho, E. *et al.* The GenTree Dendroecological Collection, tree-ring and wood  
585 density data from seven tree species across Europe. *Scientific Data* **7**, 1;  
586 10.1038/s41597-019-0340-y (2020).
- 587 17. Raquel Benavides *et al.* The GenTree Leaf Collection: inter- and intraspecific leaf  
588 variation in seven forest tree species in Europe. *Global Ecology and Biogeography*;  
589 10.1111/geb.13239.
- 590 18. Steinbach, D. *et al.* GnpIS: an information system to integrate genetic and genomic data  
591 from plants and fungi. *Database: the journal of biological databases and curation* **2013**,  
592 bat058; 10.1093/database/bat058 (2013).
- 593 19. Lotterhos, K. E. & Whitlock, M. C. Evaluation of demographic history and neutral  
594 parameterization on the performance of FST outlier tests. *Molecular Ecology* **23**, 2178–  
595 2192; 10.1111/mec.12725 (2014).
- 596 20. Lotterhos, K. E. & Whitlock, M. C. The relative power of genome scans to detect local  
597 adaptation depends on sampling design and statistical method. *Molecular Ecology* **24**,  
598 1031–1046; 10.1111/mec.13100 (2015).
- 599 21. Eckert, A. J. *et al.* Back to nature: ecological genomics of loblolly pine (*Pinus taeda*,  
600 Pinaceae). *Molecular Ecology* **19**, 3789–3805; 10.1111/j.1365-294X.2010.04698.x  
601 (2010).
- 602 22. Lind, B. M. *et al.* Water availability drives signatures of local adaptation in whitebark pine  
603 (*Pinus albicaulis* Engelm.) across fine spatial scales of the Lake Tahoe Basin, USA.  
604 *Molecular Ecology* **26**, 3168–3185; 10.1111/mec.14106 (2017).
- 605 23. Canham, C. D., LePage, P. T. & Coates, K. D. A neighborhood analysis of canopy tree  
606 competition: effects of shading versus crowding. *Can. J. For. Res.* **34**, 778–787;  
607 10.1139/x03-232 (2004).
- 608 24. Lorimer, C. G. Tests of age-independent competition indices for individual trees in natural  
609 hardwood stands. *Forest Ecology and Management* **6**, 343–360 (1983).
- 610 25. Leempoel, K. *et al.* Very high-resolution digital elevation models: are multi-scale derived  
611 variables ecologically relevant? *Methods Ecol Evol* **6**, 1373–1383; 10.1111/2041-  
612 210X.12427 (2015).
- 613 26. Conrad, O. *et al.* System for Automated Geoscientific Analyses (SAGA) v. 2.1.4. *Geosci.*  
614 *Model Dev. Discuss.* **8**, 2271–2312; 10.5194/gmdd-8-2271-2015 (2015).
- 615 27. Hengl, T. *et al.* Mapping Soil Properties of Africa at 250 m Resolution: Random Forests  
616 Significantly Improve Current Predictions. *PLoS ONE* **10**, e0125814;  
617 10.1371/journal.pone.0125814 (2015).
- 618 28. Karger, D. N. *et al.* Climatologies at high resolution for the earth's land surface areas.  
619 *Scientific Data* **4**, 170122; 10.1038/sdata.2017.122 (2017).
- 620 29. Hijmans, R. & van Etten, J. *raster: Geographic data analysis and modeling. R package*  
621 (2016).
- 622 30. Mauri, A., Strona, G. & San-Miguel-Ayanz, J. EU-Forest, a high-resolution tree  
623 occurrence dataset for Europe. *Scientific Data* **4**, 160123; 10.1038/sdata.2016.123  
624 (2017).



Click here to access/download

**Supplementary Material**

Opgenoorth et al

2020\_resubmission\_changes\_marked.docx

Plant Ecology and Geobotany  
Prof. Dr. Lars Opgenoorth  
Karl-von-Frisch Strasse 8 | D-35043 Marburg  
opgenoorth@uni-marburg.de | +49 6421 2822080

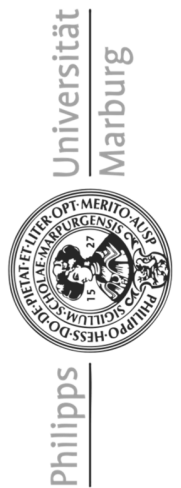

Dear Editor,

Thank you very much for giving us the chance to submit a revision of our manuscript "The GenTree Platform: growth traits and tree-level environmental data in twelve European forest tree species.

We found the reviewer comments to be very helpful and have changed the text, data and data presentation accordingly.

As you requested, we paid particular attention to reviewer 1's points regarding sampling methodology and data structure. Most notably, we added the sampling dates for the respective measurements in the data frame as requested by reviewer 1 and we have added a paragraph where we describe how we looked into three important databases namely the TRY plant trait database, the International Tree Ring Data Bank (ITRDB), and the biomass and allometry data base for woody plants (BAAD) to support our claim that we provide a unique dataset also as requested by Reviewer 1. Also, we explained how repeated measurements are not part of this data paper but are enabled by the permanent marking of trees and are planned already for a subset in a European H2020 follow-up project.

We hope that you and the reviewers will find our manuscript and data worthy for publication.

Thank you very much

  
Lars Opgenoorth
