# Supplementary material for: The GenTree Platform: growth traits and tree-level environmental data in 12 European forest tree species
Source: PubMed Central journal article supplement (PMC7970660; doi:10.1093/gigascience/giab010), 2021-03-18
Supplement: giab010_giga-d-20-00189_revision_2.pdf [file giab010_giga-d-20-00189_revision_2.pdf]

# GigaScience

## The GenTree Platform: growth traits and tree-level environmental data in twelve European forest tree species --Manuscript Draft--

|                                                      |                                                                                                                                                                                                                                                                                                                                                                                                                                                                                                                                                                                                                                                                                                                                                                                                                                                                                                                                                                                                                                                                                                                                                                                                                                                                                                                                                                                                                                                                                                                                                                                                                                                                                                                                                                                                                                                                                                                                                                                                                                                                                                                                                                                                                                                |                   |
|------------------------------------------------------|------------------------------------------------------------------------------------------------------------------------------------------------------------------------------------------------------------------------------------------------------------------------------------------------------------------------------------------------------------------------------------------------------------------------------------------------------------------------------------------------------------------------------------------------------------------------------------------------------------------------------------------------------------------------------------------------------------------------------------------------------------------------------------------------------------------------------------------------------------------------------------------------------------------------------------------------------------------------------------------------------------------------------------------------------------------------------------------------------------------------------------------------------------------------------------------------------------------------------------------------------------------------------------------------------------------------------------------------------------------------------------------------------------------------------------------------------------------------------------------------------------------------------------------------------------------------------------------------------------------------------------------------------------------------------------------------------------------------------------------------------------------------------------------------------------------------------------------------------------------------------------------------------------------------------------------------------------------------------------------------------------------------------------------------------------------------------------------------------------------------------------------------------------------------------------------------------------------------------------------------|-------------------|
| <b>Manuscript Number:</b>                            | GIGA-D-20-00189R2                                                                                                                                                                                                                                                                                                                                                                                                                                                                                                                                                                                                                                                                                                                                                                                                                                                                                                                                                                                                                                                                                                                                                                                                                                                                                                                                                                                                                                                                                                                                                                                                                                                                                                                                                                                                                                                                                                                                                                                                                                                                                                                                                                                                                              |                   |
| <b>Full Title:</b>                                   | The GenTree Platform: growth traits and tree-level environmental data in twelve European forest tree species                                                                                                                                                                                                                                                                                                                                                                                                                                                                                                                                                                                                                                                                                                                                                                                                                                                                                                                                                                                                                                                                                                                                                                                                                                                                                                                                                                                                                                                                                                                                                                                                                                                                                                                                                                                                                                                                                                                                                                                                                                                                                                                                   |                   |
| <b>Article Type:</b>                                 | Data Note                                                                                                                                                                                                                                                                                                                                                                                                                                                                                                                                                                                                                                                                                                                                                                                                                                                                                                                                                                                                                                                                                                                                                                                                                                                                                                                                                                                                                                                                                                                                                                                                                                                                                                                                                                                                                                                                                                                                                                                                                                                                                                                                                                                                                                      |                   |
| <b>Funding Information:</b>                          | Horizon 2020 Framework Programme (676876)                                                                                                                                                                                                                                                                                                                                                                                                                                                                                                                                                                                                                                                                                                                                                                                                                                                                                                                                                                                                                                                                                                                                                                                                                                                                                                                                                                                                                                                                                                                                                                                                                                                                                                                                                                                                                                                                                                                                                                                                                                                                                                                                                                                                      | Mr. Bruno Fady    |
|                                                      | Staatssekretariat für Bildung, Forschung und Innovation (6.0032)                                                                                                                                                                                                                                                                                                                                                                                                                                                                                                                                                                                                                                                                                                                                                                                                                                                                                                                                                                                                                                                                                                                                                                                                                                                                                                                                                                                                                                                                                                                                                                                                                                                                                                                                                                                                                                                                                                                                                                                                                                                                                                                                                                               | Mr. Felix Gugerli |
| <b>Abstract:</b>                                     | <p><b>Background:</b><br/>Progress in the field of evolutionary forest ecology has been hampered by the huge challenge of phenotyping trees across their ranges in their natural environments, and the limitation in high-resolution environmental information.</p> <p><b>Findings:</b><br/>The GenTree Platform contains phenotypic and environmental data from 4,959 trees from twelve ecologically and economically important European forest tree species: <i>Abies alba</i> Mill. (silver fir), <i>Betula pendula</i> Roth. (silver birch), <i>Fagus sylvatica</i> L. (European beech), <i>Picea abies</i> (L.) H. Karst (Norway spruce), <i>Pinus cembra</i> L. (Swiss stone pine), <i>Pinus halepensis</i> Mill. (Aleppo pine), <i>Pinus nigra</i> Arnold (European black pine), <i>Pinus pinaster</i> Aiton (maritime pine), <i>Pinus sylvestris</i> L. (Scots pine), <i>Populus nigra</i> L. (European black poplar), <i>Taxus baccata</i> L. (English yew), and <i>Quercus petraea</i> (Matt.) Liebl. (sessile oak). Phenotypic (height, diameter at breast height, crown-size, bark-thickness, biomass, straightness, forking, branch angle, fructification), regeneration, environmental in-situ measurements (soil depth, vegetation cover, competition indices), and environmental modeling data extracted by using bilinear interpolation accounting for surrounding conditions of each tree (precipitation, temperature, insolation, drought indices) were obtained from trees in 194 sites covering the species' geographic ranges and reflecting local environmental gradients.</p> <p><b>Conclusion:</b><br/>The GenTree Platform is a new resource for investigating ecological and evolutionary processes in forest trees. The coherent phenotyping and environmental characterization across 12 species in their European ranges allows for a wide range of analyses from forest ecologists, conservationists and macro-ecologists. In addition, the data here presented can be linked to the GenTree Dendroecological collection, the GenTree Leaf Trait collection, and the GenTree Genomic collection presented elsewhere, that together build the largest evolutionary forest ecology data collection available.</p> |                   |
| <b>Corresponding Author:</b>                         | Lars Opgenoorth<br>Philipps-Universität Marburg<br>Marburg, Hessen GERMANY                                                                                                                                                                                                                                                                                                                                                                                                                                                                                                                                                                                                                                                                                                                                                                                                                                                                                                                                                                                                                                                                                                                                                                                                                                                                                                                                                                                                                                                                                                                                                                                                                                                                                                                                                                                                                                                                                                                                                                                                                                                                                                                                                                     |                   |
| <b>Corresponding Author Secondary Information:</b>   |                                                                                                                                                                                                                                                                                                                                                                                                                                                                                                                                                                                                                                                                                                                                                                                                                                                                                                                                                                                                                                                                                                                                                                                                                                                                                                                                                                                                                                                                                                                                                                                                                                                                                                                                                                                                                                                                                                                                                                                                                                                                                                                                                                                                                                                |                   |
| <b>Corresponding Author's Institution:</b>           | Philipps-Universität Marburg                                                                                                                                                                                                                                                                                                                                                                                                                                                                                                                                                                                                                                                                                                                                                                                                                                                                                                                                                                                                                                                                                                                                                                                                                                                                                                                                                                                                                                                                                                                                                                                                                                                                                                                                                                                                                                                                                                                                                                                                                                                                                                                                                                                                                   |                   |
| <b>Corresponding Author's Secondary Institution:</b> |                                                                                                                                                                                                                                                                                                                                                                                                                                                                                                                                                                                                                                                                                                                                                                                                                                                                                                                                                                                                                                                                                                                                                                                                                                                                                                                                                                                                                                                                                                                                                                                                                                                                                                                                                                                                                                                                                                                                                                                                                                                                                                                                                                                                                                                |                   |
| <b>First Author:</b>                                 | Lars Opgenoorth                                                                                                                                                                                                                                                                                                                                                                                                                                                                                                                                                                                                                                                                                                                                                                                                                                                                                                                                                                                                                                                                                                                                                                                                                                                                                                                                                                                                                                                                                                                                                                                                                                                                                                                                                                                                                                                                                                                                                                                                                                                                                                                                                                                                                                |                   |
| <b>First Author Secondary Information:</b>           |                                                                                                                                                                                                                                                                                                                                                                                                                                                                                                                                                                                                                                                                                                                                                                                                                                                                                                                                                                                                                                                                                                                                                                                                                                                                                                                                                                                                                                                                                                                                                                                                                                                                                                                                                                                                                                                                                                                                                                                                                                                                                                                                                                                                                                                |                   |
| <b>Order of Authors:</b>                             | Lars Opgenoorth                                                                                                                                                                                                                                                                                                                                                                                                                                                                                                                                                                                                                                                                                                                                                                                                                                                                                                                                                                                                                                                                                                                                                                                                                                                                                                                                                                                                                                                                                                                                                                                                                                                                                                                                                                                                                                                                                                                                                                                                                                                                                                                                                                                                                                |                   |
|                                                      | Benjamin Dauphin                                                                                                                                                                                                                                                                                                                                                                                                                                                                                                                                                                                                                                                                                                                                                                                                                                                                                                                                                                                                                                                                                                                                                                                                                                                                                                                                                                                                                                                                                                                                                                                                                                                                                                                                                                                                                                                                                                                                                                                                                                                                                                                                                                                                                               |                   |

|                           |
|---------------------------|
| Raquel Benavides          |
| Katrin Heer               |
| Paraskevi Alizoti         |
| Elisabet Martínez-Sancho  |
| Ricardo Alía              |
| Olivier Ambrosio          |
| Albet Audrey              |
| Camilla Avanzi            |
| Evangelia Avramidou       |
| Francesca Bagnoli         |
| Evangelos Barbas          |
| Cristina C. Bastias       |
| Catherine Bastien         |
| Eduardo Ballesteros       |
| Giorgia Beffa             |
| Frédéric Bernier          |
| Henri Bignalet            |
| Guillaume Bodineau        |
| Damien Bouic              |
| Sabine Brodbeck           |
| William Brunetto          |
| Jurata Buchovska          |
| Melanie Buy               |
| Ana M. Cabanillas-Saldaña |
| Bárbara Carvalho          |
| Nicolas Cheval            |
| José M. Climent           |
| Marianne Correard         |
| Eva Cremer                |
| Darius Danusevičius       |
| Fernando Del Caño         |
| Jean-Luc Denou            |
| Nicolas di Gerardi        |
| Bernard Dokhelar          |
| Alexis Ducouso            |
| Eskild Nilsen             |
| Anna-Maria Farsakoglou    |
| Patrick Fonti             |
| Ioannis Ganopoulos        |
| José M. García del Barrio |
| Olivier Gilg              |

|                               |
|-------------------------------|
| Santiago C. González-Martínez |
| René Graf                     |
| Alan Gray                     |
| Delphine Grivet               |
| Felix Gugerli                 |
| Christoph Hartleitner         |
| Enja Hollenbach               |
| Agathe Hurel                  |
| Bernard Issehut               |
| Florence Jean                 |
| Veronique Jorge               |
| Arnaud Jouineau               |
| Jan-Philipp Kappner           |
| Katri Kärkkäinen              |
| Robert Kesälahti              |
| Florian Knutzen               |
| Sonja Kujala                  |
| Timo Kumpula                  |
| Mariaceleste Labriola         |
| Celine Lalanne                |
| Johannes Lambertz             |
| Martin Lascoux                |
| Vincent Lejeune               |
| Gregoire Le-Provost           |
| Joseph Levillain              |
| Mirko Liesebach               |
| David López-Quiroga           |
| Benjamin Meier                |
| Ermioni Malliarou             |
| Jérémy Marchon                |
| Nicolas Mariotte              |
| Antonio Mas                   |
| Silvia Matesanz               |
| Helge Meischner               |
| Célia Michotey                |
| Pascal Milesi                 |
| Sandro Morganti               |
| Daniel Nievergelt             |
| Eduardo Notivol               |
| Geir Ostreng                  |
| Birte Pakull                  |

|                                                |                                                                                                                                                                                                                                                                                                                                                                                                                                                                                                                                                                                                                                                             |
|------------------------------------------------|-------------------------------------------------------------------------------------------------------------------------------------------------------------------------------------------------------------------------------------------------------------------------------------------------------------------------------------------------------------------------------------------------------------------------------------------------------------------------------------------------------------------------------------------------------------------------------------------------------------------------------------------------------------|
|                                                | Annika Perry                                                                                                                                                                                                                                                                                                                                                                                                                                                                                                                                                                                                                                                |
|                                                | Andrea Piotti                                                                                                                                                                                                                                                                                                                                                                                                                                                                                                                                                                                                                                               |
|                                                | Christophe Plomion                                                                                                                                                                                                                                                                                                                                                                                                                                                                                                                                                                                                                                          |
|                                                | Nicolas Poinot                                                                                                                                                                                                                                                                                                                                                                                                                                                                                                                                                                                                                                              |
|                                                | Mehdi Pringarbe                                                                                                                                                                                                                                                                                                                                                                                                                                                                                                                                                                                                                                             |
|                                                | Luc Puzos                                                                                                                                                                                                                                                                                                                                                                                                                                                                                                                                                                                                                                                   |
|                                                | Tanja Pyhäjärvi                                                                                                                                                                                                                                                                                                                                                                                                                                                                                                                                                                                                                                             |
|                                                | Annie Raffin                                                                                                                                                                                                                                                                                                                                                                                                                                                                                                                                                                                                                                                |
|                                                | José A. Ramírez-Valiente                                                                                                                                                                                                                                                                                                                                                                                                                                                                                                                                                                                                                                    |
|                                                | Christian Rellstab                                                                                                                                                                                                                                                                                                                                                                                                                                                                                                                                                                                                                                          |
|                                                | Dourthe Remi                                                                                                                                                                                                                                                                                                                                                                                                                                                                                                                                                                                                                                                |
|                                                | Sebastian Richter                                                                                                                                                                                                                                                                                                                                                                                                                                                                                                                                                                                                                                           |
|                                                | Juan J. Robledo-Arnuncio                                                                                                                                                                                                                                                                                                                                                                                                                                                                                                                                                                                                                                    |
|                                                | Sergio San Segundo                                                                                                                                                                                                                                                                                                                                                                                                                                                                                                                                                                                                                                          |
|                                                | Outi Savolainen                                                                                                                                                                                                                                                                                                                                                                                                                                                                                                                                                                                                                                             |
|                                                | Volker Schneck                                                                                                                                                                                                                                                                                                                                                                                                                                                                                                                                                                                                                                              |
|                                                | Ivan Scotti                                                                                                                                                                                                                                                                                                                                                                                                                                                                                                                                                                                                                                                 |
|                                                | Vladimir Semerikov                                                                                                                                                                                                                                                                                                                                                                                                                                                                                                                                                                                                                                          |
|                                                | Lenka Slámová                                                                                                                                                                                                                                                                                                                                                                                                                                                                                                                                                                                                                                               |
|                                                | Jørn Henrik Sønstebø                                                                                                                                                                                                                                                                                                                                                                                                                                                                                                                                                                                                                                        |
|                                                | Ilaria Spanu                                                                                                                                                                                                                                                                                                                                                                                                                                                                                                                                                                                                                                                |
|                                                | Jean Thevenet                                                                                                                                                                                                                                                                                                                                                                                                                                                                                                                                                                                                                                               |
|                                                | Mari Mette Tollefsrud                                                                                                                                                                                                                                                                                                                                                                                                                                                                                                                                                                                                                                       |
|                                                | Norbert Turion                                                                                                                                                                                                                                                                                                                                                                                                                                                                                                                                                                                                                                              |
|                                                | Giovanni Giuseppe Vendramin                                                                                                                                                                                                                                                                                                                                                                                                                                                                                                                                                                                                                                 |
|                                                | Marc Villar                                                                                                                                                                                                                                                                                                                                                                                                                                                                                                                                                                                                                                                 |
|                                                | Georg Von Arx                                                                                                                                                                                                                                                                                                                                                                                                                                                                                                                                                                                                                                               |
|                                                | Johan Westin                                                                                                                                                                                                                                                                                                                                                                                                                                                                                                                                                                                                                                                |
|                                                | Bruno Fady                                                                                                                                                                                                                                                                                                                                                                                                                                                                                                                                                                                                                                                  |
|                                                | Tor Myking                                                                                                                                                                                                                                                                                                                                                                                                                                                                                                                                                                                                                                                  |
|                                                | Fernando Valladares                                                                                                                                                                                                                                                                                                                                                                                                                                                                                                                                                                                                                                         |
|                                                | Filippos A. Aravanopoulos                                                                                                                                                                                                                                                                                                                                                                                                                                                                                                                                                                                                                                   |
|                                                | Stephen Cavers                                                                                                                                                                                                                                                                                                                                                                                                                                                                                                                                                                                                                                              |
| <b>Order of Authors Secondary Information:</b> |                                                                                                                                                                                                                                                                                                                                                                                                                                                                                                                                                                                                                                                             |
| <b>Response to Reviewers:</b>                  | <p>1. I have included the corrected author list</p> <p>2. I citing the GigaDB repository. However, since the doi is not yet availabl, I followed this advise by Chris Hunter: "Thank you, I will process the dataset as soon as possible. If that is the only bit of information you require to complete the manuscript submission then there is no need for you to wait, the handling editor (CC'd) can insert the dataset citation on your behalf during the copy editing stage."</p> <p>3. I send a brief explanation via email regarding the additional author.</p> <p>4. The additional author fits under the contribution listed as was in place.</p> |

| Additional Information:                                                                                                                                                                                                                                                                                                                                                                                                                                                                                                             |          |
|-------------------------------------------------------------------------------------------------------------------------------------------------------------------------------------------------------------------------------------------------------------------------------------------------------------------------------------------------------------------------------------------------------------------------------------------------------------------------------------------------------------------------------------|----------|
| Question                                                                                                                                                                                                                                                                                                                                                                                                                                                                                                                            | Response |
| Are you submitting this manuscript to a special series or article collection?                                                                                                                                                                                                                                                                                                                                                                                                                                                       | No       |
| <p><b>Experimental design and statistics</b></p> <p>Full details of the experimental design and statistical methods used should be given in the Methods section, as detailed in our <a href="#">Minimum Standards Reporting Checklist</a>. Information essential to interpreting the data presented should be made available in the figure legends.</p> <p>Have you included all the information requested in your manuscript?</p>                                                                                                  | Yes      |
| <p><b>Resources</b></p> <p>A description of all resources used, including antibodies, cell lines, animals and software tools, with enough information to allow them to be uniquely identified, should be included in the Methods section. Authors are strongly encouraged to cite <a href="#">Research Resource Identifiers</a> (RRIDs) for antibodies, model organisms and tools, where possible.</p> <p>Have you included the information requested as detailed in our <a href="#">Minimum Standards Reporting Checklist</a>?</p> | Yes      |
| <p><b>Availability of data and materials</b></p> <p>All datasets and code on which the conclusions of the paper rely must be either included in your submission or deposited in <a href="#">publicly available repositories</a> (where available and ethically appropriate), referencing such data using a unique identifier in the references and in the “Availability of Data and Materials” section of your manuscript.</p>                                                                                                      | Yes      |

Have you have met the above requirement as detailed in our [Minimum Standards Reporting Checklist](#)?

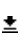

# 1 The GenTree Platform: growth traits and tree-level 2 environmental data in twelve European forest tree 3 species

4 Opgenoorth, Lars<sup>1,2</sup>, Dauphin, Benjamin<sup>2</sup>, Benavides, Raquel<sup>3</sup>, Heer, Katrin<sup>1</sup>, Alizoti, Paraskevi<sup>4</sup>,  
5 Martínez-Sancho, Elisabet<sup>2</sup>, Alía, Ricardo<sup>5</sup>, Ambrosio, Olivier<sup>6</sup>, Audrey, Albet<sup>7</sup>, Auñón, Francisco<sup>5</sup>,  
6 Avanzi, Camilla<sup>8</sup>, Avramidou, Evangelia<sup>4</sup>, Bagnoli, Francesca<sup>8</sup>, Barbas, Evangelos<sup>4</sup>, Bastias, Cristina  
7 C.<sup>9</sup>, Bastien, Catherine<sup>10</sup>, Ballesteros, Eduardo<sup>5</sup>, Beffa, Giorgia<sup>2</sup>, Bernier, Frédéric<sup>7</sup>, Bignalet, Henri<sup>7</sup>,  
8 Bodineau, Guillaume<sup>11</sup>, Bouic, Damien<sup>7</sup>, Brodbeck, Sabine<sup>2</sup>, Brunetto, William<sup>6</sup>, Buchovska, Jurata<sup>12</sup>,  
9 Buy, Melanie<sup>6</sup>, Cabanillas-Saldaña, Ana M.<sup>13</sup>, Carvalho, Bárbara<sup>3</sup>, Cheval, Nicolas<sup>7</sup>, Climent, José  
10 M.<sup>5</sup>, Correard, Marianne<sup>6</sup>, Cremer, Eva<sup>14</sup>, Danusevičius, Darius<sup>12</sup>, Del Caño, Fernando<sup>5</sup>, Denou, Jean-  
11 Luc<sup>7</sup>, di Gerardi, Nicolas<sup>2</sup>, Dokhelar, Bernard<sup>7</sup>, Ducouso, Alexis<sup>15</sup>, Eskild Nilsen, Anne<sup>16</sup>,  
12 Farsakoglou, Anna-Maria<sup>4</sup>, Fonti, Patrick<sup>2</sup>, Ganopoulos, Ioannis<sup>17</sup>, García del Barrio, José M.<sup>5</sup>, Gilg,  
13 Olivier<sup>6</sup>, González-Martínez, Santiago C.<sup>7</sup>, Graf, René<sup>2</sup>, Gray, Alan<sup>18</sup>, Grivet, Delphine<sup>5</sup>, Gugerli,  
14 Felix<sup>2</sup>, Hartleitner, Christoph<sup>19</sup>, Hollenbach, Enja<sup>1</sup>, Hurel, Agathe<sup>7</sup>, Issehut, Bernard<sup>7</sup>, Jean, Florence<sup>6</sup>,  
15 Jorge, Veronique<sup>20</sup>, Jouineau, Arnaud<sup>6</sup>, Kappner, Jan-Philipp<sup>1</sup>, Kärkkäinen, Katri<sup>21</sup>, Kesälähti,  
16 Robert<sup>22</sup>, Knutzen, Florian<sup>14</sup>, Kujala, Sonja T<sup>21</sup>, Kumpula, Timo A<sup>22</sup>, Labriola, Mariaceleste<sup>8</sup>, Lalanne,  
17 Celine<sup>15</sup>, Lambertz, Johannes<sup>1</sup>, Lascoux, Martin<sup>23</sup>, Lejeune, Vincent<sup>11</sup>, Le-Provost, Gregoire<sup>15</sup>,  
18 Levillain, Joseph<sup>24</sup>, Liesebach, Mirko<sup>25</sup>, López-Quiroga, David<sup>3</sup>, Meier, Benjamin<sup>2</sup>, Malliarou, Ermioni<sup>4</sup>,  
19 Marchon, Jérémy<sup>2</sup>, Mariotte, Nicolas<sup>6</sup>, Mas, Antonio<sup>3</sup>, Matesanz, Silvia<sup>26</sup>, Meischner, Helge<sup>1</sup>,  
20 Michotey, Célia<sup>27</sup>, Milesi, Pascal<sup>28</sup>, Morganti, Sandro<sup>2</sup>, Nievergelt, Daniel<sup>2</sup>, Notivol, Eduardo<sup>29</sup>,  
21 Ostreng, Geir<sup>16</sup>, Pakull, Birte<sup>25</sup>, Perry, Annika<sup>18</sup>, Piotti, Andrea<sup>8</sup>, Plomion, Christophe<sup>15</sup>, Pointot,  
22 Nicolas<sup>7</sup>, Pringarbe, Mehdi<sup>6</sup>, Puzos, Luc<sup>7</sup>, Pyhäjärvi, Tanja<sup>22</sup>, Raffin, Annie<sup>7</sup>, Ramírez-Valiente, José  
23 A.<sup>5</sup>, Rellstab, Christian<sup>2</sup>, Remi, Dourthe<sup>7</sup>, Richter, Sebastian<sup>1</sup>, Robledo-Arnuncio, Juan J.<sup>5</sup>, San  
24 Segundo, Sergio<sup>5</sup>, Savolainen, Outi<sup>22</sup>, Schueler, Silvio<sup>30</sup>, Schneck, Volker<sup>31</sup>, Scotti, Ivan<sup>6</sup>, Semerikov,  
25 Vladimir<sup>32</sup>, Slámová, Lenka<sup>2</sup>, Sønstebø, Jørn Henrik<sup>16</sup>, Spanu, Ilaria<sup>8</sup>, Thevenet, Jean<sup>6</sup>, Tollefsrud,  
26 Mari Mette<sup>16</sup>, Turion, Norbert<sup>6</sup>, Vendramin, Giovanni Giuseppe<sup>8</sup>, Villar, Marc<sup>20</sup>, von Arx, Georg<sup>2</sup>,  
27 Westin, Johan<sup>33</sup>, Fady, Bruno<sup>6</sup>, Myking, Tor<sup>16</sup>, Valladares, Fernando<sup>3</sup>, Aravanopoulos, Filippos A.<sup>4</sup>,  
28 Cavers, Stephen<sup>18</sup>

29 <sup>1</sup>Philipps University Marburg, Faculty of Biology, Karl-von-Frisch Strasse 8, 35043 Marburg, Germany

30 <sup>2</sup>Swiss Federal Research Institute WSL, Zürcherstrasse 111, 8903, Birmensdorf, Switzerland

31 <sup>3</sup>LINCGlobal, Department of Biogeography and Global Change, Museo Nacional de Ciencias  
32 Naturales, CSIC, Serrano 115 dpdo, 28006, Madrid, Spain

33 <sup>4</sup>Aristotle University of Thessaloniki, School of Forestry and Natural Environment, Laboratory of  
34 Forest Genetics and Tree Improvement, 54124 Thessaloniki, Greece

35 <sup>5</sup>Instituto Nacional de Investigación y Tecnología Agraria y Alimentaria - Centro de Investigación  
36 Forestal (INIA-CIFOR), Ctra. de la Coruña km 7.5, 28040, Madrid, Spain

37 <sup>6</sup>Institut National de Recherche en Agriculture, Alimentation et Environment (INRAE), Domaine Saint  
38 Paul, Site Agroparc, 84914, Avignon, France

39 <sup>7</sup>Institut National de Recherche en Agriculture, Alimentation et Environment (INRAE), UEFP, 33610  
40 Cestas, France

41 <sup>8</sup>Institute of Biosciences and BioResources, National Research Council (CNR), via Madonna del  
42 Piano 10, 50019, Sesto, Fiorentino, Italy

43 <sup>9</sup>Centre d'Ecologie Fonctionnelle et Evolutive (CEFE), CNRS, UMR 5175, Montpellier, France

44 <sup>10</sup>Institut National de Recherche en Agriculture, Alimentation et Environment (INRAE), Dept ECOFA,  
45 F-45075 Orléans, France

46 <sup>11</sup>Institut National de Recherche en Agriculture, Alimentation et Environment (INRAE), GBFOR, 45075  
47 Orléans, France

48 <sup>12</sup>Vytautas Magnus University, Studentu Street 11, 53361, Akademija, Lithuania.

49 <sup>13</sup>Departamento de Agricultura, Ganadería y Medio Ambiente, Gobierno de Aragón, P. M<sup>a</sup> Agustín 36,  
50 50071 Zaragoza, Spain

51 <sup>14</sup>Bavarian Institute for Forest Genetics , Forstamtsplatz 1, 83317 Teisendorf, Germany  
52 <sup>15</sup>INRAE, Univ. Bordeaux, BIOGECO, F-33770 Cestas, France  
53 <sup>16</sup>Division of Forestry and Forest Resources, Norwegian Institute of Bioeconomy Research (NIBIO),  
54 P.O. Box 115, 1431, Ås, Norway  
55 <sup>17</sup>Institute of Plant Breeding and Genetic Resources, Hellenic Agricultural Organization DEMETER (ex  
56 NAGREF), Thermi, 57001, Greece  
57 <sup>18</sup>UK Centre for Ecology and Hydrology, Bush Estate Penicuik, EH26 0QB, United Kingdom  
58 <sup>19</sup>LIECO GmbH & Co KG  
59 <sup>20</sup>Institut National de Recherche en Agriculture, Alimentation et Environment (INRAE), ONF,  
60 BIOFORA, 45075 Orléans, France  
61 <sup>21</sup>Natural Resources Institute Finland, Paavo Havaksentie 3, 90014, University of Oulu, Finland  
62 <sup>22</sup>University of Oulu, Pentti Kaiteran katu 1, 90014, University of Oulu, Finland  
63 <sup>23</sup>Department of Ecology & Genetics, EBC, Uppsala University, Norbyvägen 18D, 75236, Uppsala,  
64 Sweden  
65 <sup>24</sup>Université de Lorraine, AgroParisTech, INRAE, SILVA, 54000 Nancy, France  
66 <sup>25</sup>Thünen Institute of Forest Genetics, Sieker Landstr. 2, Grosshansdorf, 22927, Germany  
67 <sup>26</sup>Área de Biodiversidad y Conservación, Universidad Rey Juan Carlos, Calle Tulipán s/n, 28933,  
68 Móstoles, Spain  
69 <sup>27</sup>Institut National de Recherche en Agriculture, Alimentation et Environment (INRAE), URGI,  
70 Versailles, France  
71 <sup>28</sup>Department of Ecology & Genetics, EBC, Science for Life Laboratory, Uppsala University, Uppsala,  
72 Sweden  
73 <sup>29</sup>Centro de Investigación y Tecnología Agroalimentaria de Aragón - Unidad de Recursos Forestales  
74 (CITA),Avda. Montañana 930, 50059, Zaragoza, Spain  
75 <sup>30</sup>Austrian Research Centre for Forests (BFW), Seckendorff-Gudent-Weg 8, 1131, Wien, Austria  
76 <sup>31</sup>Thünen Institute of Forest Genetics, Eberswalder Chaussee 3a, Waldsiefersdorf, 15377, Germany  
77 <sup>32</sup>Institute of Plant and Animal Ecology, Ural branch of RAS, 8 Marta St. 202, 620144, Ekaterinburg,  
78 Russia  
79 <sup>33</sup>Skogforsk, Tomterna 1, 918 21 Sävar, Sweden  
80  
81 [opgenoorth@uni-marburg.de](mailto:opgenoorth@uni-marburg.de); [lars.opgenoorth@wsl.ch](mailto:lars.opgenoorth@wsl.ch)  
82 [benjamin.dauphin@wsl.ch](mailto:benjamin.dauphin@wsl.ch)  
83 [rbenavidescalvo@gmail.com](mailto:rbenavidescalvo@gmail.com)  
84 [katrin.heer@uni-marburg.de](mailto:katrin.heer@uni-marburg.de)  
85 [alizotp@for.auth.gr](mailto:alizotp@for.auth.gr)  
86 [elisabet.martinez@wsl.ch](mailto:elisabet.martinez@wsl.ch)  
87 [alia@inia.es](mailto:alia@inia.es)  
88 [olivier.ambrosio@inrae.fr](mailto:olivier.ambrosio@inrae.fr)  
89 [audrey.albet.1@inrae.fr](mailto:audrey.albet.1@inrae.fr)  
90 [aunon.francisco@inia.es](mailto:aunon.francisco@inia.es)  
91 [camilla.avanzi@ibbr.cnr.it](mailto:camilla.avanzi@ibbr.cnr.it)  
92 [aevaggelia@yahoo.com](mailto:aevaggelia@yahoo.com)  
93 [francesca.bagnoli@ibbr.cnr.it](mailto:francesca.bagnoli@ibbr.cnr.it)  
94 [vbarbas@for.auth.gr](mailto:vbarbas@for.auth.gr)  
95 [crbasc@gmail.com](mailto:crbasc@gmail.com)  
96 [catherine.bastien@inrae.fr](mailto:catherine.bastien@inrae.fr)  
97 [eduardo.ballesteros@inia.es](mailto:eduardo.ballesteros@inia.es)  
98 [giorgia.beffa@gmail.com](mailto:giorgia.beffa@gmail.com)  
99 [frederic.bernier@inrae.fr](mailto:frederic.bernier@inrae.fr)  
100 [henri.bignalet@inrae.fr](mailto:henri.bignalet@inrae.fr)  
101 [guillaume.bodineau@inrae.fr](mailto:guillaume.bodineau@inrae.fr)  
102 [damien.bouic@inrae.fr](mailto:damien.bouic@inrae.fr)



103 sabine.brodbeck@wsl.ch  
104 william.brunetto@inrae.fr  
105 jurata.buchovska@vdu.lt  
106 Melanie.Buy@inrae.fr  
107 acabanillas@aragon.es  
108 babic.barbosa@gmail.com  
109 nicolas.cheval@inrae.fr  
110 climent@inia.es  
111 marianne.correard@inrae.fr  
112 Eva.Cremer@awg.bayern.de  
113 darius.danusevicius@vdu.lt  
114 umgf@inia.es  
115 jean-luc.denou@inrae.fr  
116 nicolas.degirardi@gmail.com  
117 bernard.dokhelar@inrae.fr  
118 alexis.ducouso@inrae.fr  
119 anne.eskild.nilsen@nibio.no  
120 amfarsakoglou@gmail.com  
121 patrick.fonti@wsl.ch  
122 giannis.ganopoulos@gmail.com  
123 jmgarcia@inia.es  
124 olivier.gilg@inrae.fr  
125 santiago.gonzalez-martinez@inrae.fr  
126 rene.graf@wsl.ch  
127 alangray@ceh.ac.uk  
128 dgrivet@inia.es  
129 felix.gugerli@wsl.ch  
130 hartleitner@sfl.at  
131 Hollenb4@students.uni-marburg.de  
132 agathe.hurel@inrae.fr  
133 bernard.issenhuth@inrae.fr  
134 florence.jean@inrae.fr  
135 veronique.jorge@inrae.fr  
136 arnaud.jouineau@inrae.fr  
137 kappnerj@students.uni-marburg.de  
138 katri.karkkainen@luke.fi  
139 robert.kesalahti@oulu.fi  
140 FAKnutzen@gmail.com  
141 sonja.kujala@luke.fi  
142 timo.kumpula@oulu.fi  
143 mclabriola@gmail.com  
144 celine.lalanne@inrae.fr  
145 Lambertj@students.uni-marburg.de  
146 martin.lascoux@ebc.uu.se  
147 vincent.lejeune@inrae.fr  
148 gregoire.le-provost@inrae.fr  
149 joseph.levillain@inrae.fr  
150 mirko.lieseback@thuenen.de  
151 david.quiroga@csic.es  
152 meier.benjamin@outlook.com  
153 ermionimalliarou@yahoo.gr  
154 jeremy.marchon@romandie.ch

155 nicolas.mariotte@inrae.fr  
156 antonio.mas@mncn.csic.es  
157 silvia.matesanzgarcia@gmail.com  
158 helgem@posteo.de  
159 celia.michotey@inrae.fr  
160 pascal.milesi@scilifelab.uu.se  
161 msandro@posteo.ch  
162 daniel.nievergelt@wsl.ch  
163 enotivol@cita-aragon.es  
164 geir.ostreng@nibio.no  
165 birte.pakull@thuenen.de  
166 annt@ceh.ac.uk  
167 andrea.piotti@ibbr.cnr.it  
168 christophe.plomion@inrae.fr  
169 nicolas.poinot@inrae.fr  
170 mehdi.pringarbe@inrae.fr  
171 luc.puzos@inrae.fr  
172 tanja.pyhajarvi@oulu.fi  
173 annie.raffin@inrae.fr  
174 josealberto.ramirezvaliente@gmail.com  
175 christian.rellstab@wsl.ch  
176 remi.dourthe@inrae.fr  
177 richte3d@staff.uni-marburg.de  
178 jjrobledo@gmail.com  
179 sergio.sansegundo@inia.es  
180 outi.savolainen@oulu.fi  
181 silvio.schueler@bfw.gv.at  
182 volker.schneck@thuenen.de  
183 ivan.scotti@inrae.fr  
184 semerikov@ipae.uran.ru  
185 lenka.mateju@wsl.ch  
186 jorn.sonstebo@nmbu.no  
187 ilaria.spanu@ibbr.cnr.it  
188 jean.thevenet@inrae.fr  
189 Mari.Mette.Tollefsrud@nibio.no  
190 Norbert.Turion@inrae.fr  
191 giovanni.vendramin@ibbr.cnr.it  
192 marc.villar@inrae.fr  
193 georg.vonarx@wsl.ch  
194 johan.westin@skogforsk.se  
195 bruno.fady@inrae.fr  
196 tor.myking@nibio.no  
197 valladares@ccma.csic.es  
198 aravanop@auth.gr  
199 scav@ceh.ac.uk  
200  
201 Corresponding authors: [opgenoorth@uni-marburg.de](mailto:opgenoorth@uni-marburg.de), [benjamin.dauphin@wsl.ch](mailto:benjamin.dauphin@wsl.ch), [scav@ceh.ac.uk](mailto:scav@ceh.ac.uk)

## 202 Abstract

### 203 **Background:**

204 Progress in the field of evolutionary forest ecology has been hampered by the huge  
205 challenge of phenotyping trees across their ranges in their natural environments, and the  
206 limitation in high-resolution environmental information.

### 207 **Findings:**

208 The GenTree Platform contains phenotypic and environmental data from 4,959 trees from  
209 twelve ecologically and economically important European forest tree species: *Abies alba*  
210 Mill. (silver fir), *Betula pendula* Roth. (silver birch), *Fagus sylvatica* L. (European beech),  
211 *Picea abies* (L.) H. Karst (Norway spruce), *Pinus cembra* L. (Swiss stone pine), *Pinus*  
212 *halepensis* Mill. (Aleppo pine), *Pinus nigra* Arnold (European black pine), *Pinus pinaster*  
213 Aiton (maritime pine), *Pinus sylvestris* L. (Scots pine), *Populus nigra* L. (European black  
214 poplar), *Taxus baccata* L. (English yew), and *Quercus petraea* (Matt.) Liebl. (sessile oak).  
215 Phenotypic (height, diameter at breast height, crown-size, bark-thickness, biomass,  
216 straightness, forking, branch angle, fructification), regeneration, environmental in-situ  
217 measurements (soil depth, vegetation cover, competition indices), and environmental  
218 modeling data extracted by using bilinear interpolation accounting for surrounding conditions  
219 of each tree (precipitation, temperature, insolation, drought indices) were obtained from trees  
220 in 194 sites covering the species' geographic ranges and reflecting local environmental  
221 gradients.

### 222 **Conclusion:**

223 The GenTree Platform is a new resource for investigating ecological and evolutionary  
224 processes in forest trees. The coherent phenotyping and environmental characterization  
225 across 12 species in their European ranges allow for a wide range of analyses from forest  
226 ecologists, conservationists, and macro-ecologists. Also, the data here presented can be  
227 linked to the GenTree Dendroecological collection, the GenTree Leaf Trait collection, and  
228 the GenTree Genomic collection presented elsewhere, which together build the largest  
229 evolutionary forest ecology data collection available.

|                                |                                                                                                                                                                                                                                                                                       |
|--------------------------------|---------------------------------------------------------------------------------------------------------------------------------------------------------------------------------------------------------------------------------------------------------------------------------------|
| Measurements                   | vegetation cover • rock cover • soil depth • competition index • regeneration • diameter at breast height • height • crown size • bark thickness • number of fruits • stem straightness • branch angle • forking index                                                                |
| Technology Type(s)             | bark gauges • calculations • caliper • clinometer • GPS device • increment corer • laser distance measurement • telescopic measuring pole                                                                                                                                             |
| Factor Type(s)                 | tree species                                                                                                                                                                                                                                                                          |
| Sample Characteristic Organism | <i>Abies alba</i> • <i>Betula pendula</i> • <i>Fagus sylvatica</i> • <i>Picea abies</i> • <i>Pinus cembra</i> • <i>Pinus halepensis</i> • <i>Pinus nigra</i> • <i>Pinus pinaster</i> • <i>Pinus sylvestris</i> • <i>Populus nigra</i> • <i>Taxus baccata</i> • <i>Quercus petraea</i> |
| Sample Characteristic Location | Europe                                                                                                                                                                                                                                                                                |

231 Machine-accessible metadata file describing the reported data:

## 232 Keywords

233 Regeneration, DBH, height, crown-size, bark-thickness, fruit-number, stem-straightness,  
234 branch-angle, forking-index, soil-depth

## 235 Context

236 The impacts of climate change and land-use change on forests are already severe, as  
237 observed, for example, following the extreme summer drought of 2018 that triggered a  
238 massive increase in mortality in Central European forests<sup>1</sup>. Furthermore, changes are  
239 expected to be acute in the future, altering distribution ranges and ecosystem functioning, as  
240 well as the interactions among species<sup>2</sup>. Forecasts indicate that near-surface temperature  
241 will shift poleward at mean rates of 80-430 m yr<sup>-1</sup> for temperate forests during the 21<sup>st</sup>  
242 century<sup>3</sup>. This translates into northward shifts of trees' bioclimatic envelopes from 300 to  
243 800 km within one century<sup>3</sup>. More importantly, the frequency and intensity of drought  
244 events, heat waves, forest fires, and pest outbreaks<sup>4</sup> are expected to increase.

245 In the light of these changes, species and forest ecosystem resilience will depend on the  
246 extent and structure of phenotypic plasticity, genetic variation, and adaptive potential, as well

247 as dispersal ability. From the results of extensive networks of field experiments (provenance  
248 trials), it has long been shown that tree species are locally adapted at multiple spatial scales.  
249 In Europe, where most tree populations have established following post-glacial  
250 recolonization, such patterns of local adaptation must have developed rapidly and despite  
251 long generation time and extensive gene flow <sup>5</sup>, a process enabled by high levels of within-  
252 population plasticity, genetic and epigenetic variation, and large population sizes <sup>6</sup>. Recent  
253 work has shown that genetic variation for stress response may be strongly structured along  
254 environmental gradients, such as water availability <sup>7</sup>, temperature <sup>8</sup>, or photoperiod <sup>9</sup>.  
255 However, the spatial patterns of current adaptation in particular phenotypic traits are only  
256 partly informative regarding the potential for future adaptation under a changing climate. To  
257 advance our understanding of the adaptive potential of trees, it is crucial to evaluate multiple  
258 traits in parallel to be able to model their putative response to new environmental conditions.

259 Recently, substantial effort has been made to identify specific genes and gene combinations  
260 that have undergone selection, by associating mutations at candidate loci with phenotypes  
261 related to stress events <sup>10,11</sup> or with environmental variables <sup>12</sup>. This latter example by  
262 Yeaman and co-workers <sup>12</sup> is one of the first association studies in forest tree species on a  
263 large genomic scale and the first to investigate convergent local adaptation in distantly  
264 related tree species. However, progress in this field has been hampered by limited genomic  
265 resources, the lack of small-scale, individual tree-level environmental information <sup>13</sup>, and the  
266 huge challenge of phenotyping trees in their natural environments <sup>14,15</sup>.

267 The GenTree Platform aims to address these challenges by providing individual level, high-  
268 resolution phenotypic and environmental data for a set of up to 20 sampling sites for each of  
269 twelve ecologically and economically important forest tree species across Europe. For a  
270 subset of seven species (*B. pendula*, *F. sylvatica*, *P. abies*, *P. pinaster*, *P. sylvestris*,  
271 *Populus nigra*, and *Q.petraea*), the sampling of sites was carried out in pairs, i.e. contained

272 two stands that were close enough to be connected by gene flow but situated in contrasting  
273 environments.

274 The sampling design described here was used for collecting phenotypic traits and ecological  
275 data. Also, tree ring and wood density measurements for the same trees were assessed <sup>16</sup>,  
276 and datasets on leaf traits, including specific leaf area (SLA) and isotopic content <sup>17</sup>, and  
277 high-density single nucleotide polymorphism (SNP) data for each tree, were established, that  
278 will be published in GeneBank. All data and metadata information are gathered in the GnpIS  
279 repository  
280 (<https://urgi.versailles.inra.fr/ephegis/ephegis/viewer.do#dataResults/trialSetIds=27>) which  
281 makes updates possible<sup>18</sup>.

282 We investigated the extent to which other datasets comparable to the data presented here  
283 exist by screening our twelve species in the TRY Plant Trait Data Base, the ITDRB, and the  
284 biomass and allometry database for woody plants (BAAD). While this is a systematic  
285 approach, it leaves out a large number of tree species and therefore we cannot claim to  
286 have a comprehensive overview of the existing data. However, all three databases are large  
287 collections that include at least some of the tree measurements we present. Even though  
288 these are tremendous resources, the major difference is that based on their nature as  
289 collecting points of numerous independent datasets, there is no coherent sampling scheme  
290 in these collections as such, meaning that the number of trees per site, the way of tree  
291 selection, measured phenotypes, and provided environmental information vary greatly and  
292 therefore do not allow for coherent comparative analyses such as those of the GenTree  
293 Platform. For example, BAAD reports DBH data for only four of the species presented here,  
294 namely *Betula pendula* with three populations, *Fagus sylvatica* with two populations, *Picea*  
295 *abies* with four populations, and *Pinus sylvestris* with ten populations. In the larger TRY  
296 database, all of our species are represented, but the variability of sampling schemes is much  
297 more heterogeneous concerning traits, number of populations per species, and metadata.

298 For example, DBH measurements are being reported 232 times from a total of 12 *Betula*  
299 *pendula* populations. Of these, the vast majority of the 170 measurements are from one  
300 population while from many other populations only one or up to five measurements are  
301 reported. Also, the measurements stem from five different original studies and thus having  
302 very different levels of additional information. We conclude that the core value of our  
303 reported data lies in the coherent sampling design and yet the large number of sampled  
304 populations and individuals per species.

## 305 Methods

306 All recorded parameters are listed in Table 1.

### 307 **Sampling strategy**

308 To optimize the sampling design for genome scans and association studies, we followed the  
309 recent theoretical work by Lotterhos and Whitlock<sup>19,20</sup>, which indicates that a paired  
310 sampling design has more power to detect the genomic signatures of local adaptation. Using  
311 this framework, populations from across the natural range of a species are sampled in pairs,  
312 with the two sites in each pair situated geographically close enough to be genetically similar  
313 at neutral genes due to a common evolutionary history and ongoing gene flow, but in distinct  
314 selective niches such that the local fitness optimum differs between the two sites. This  
315 sampling confers more power to detect evidence of selection in the genome through either  
316 association with environmental or phenotypic variables or the detection of outliers (e.g. for  
317 genetic differentiation,  $F_{ST}$ ) (ibid.). Trees are very amenable to a pairwise approach since  
318 they are known to be locally adapted, often at fine spatial scales<sup>21,22</sup> and irrespective of  
319 gene flow distances<sup>6</sup>. This strategy was followed for a subset of seven species (see above)  
320 for which genomic resources were available (i.e. full or draft genome).

321 Such local niche contrasts are neither easy to identify nor readily available when  
322 environments are very homogenous. Therefore, a second principle of the sampling design

323 was to cover a large part of each species' natural geographic range (Fig. 1) and  
324 environmental space (Fig. 2) to capture selective niche variation. Finally, sites with a history  
325 of intensive management or any other intense and obvious anthropogenic or natural  
326 disturbances were avoided. This strategy was followed for all the 12 species.

### 327 **Selection of trees on sites**

328 A minimum of 25 trees was sampled per site to capture the natural phenotypic and genetic  
329 variability. Trees had to be mature but not senescent, dominant or codominant and had to  
330 show no signs of significant damage due to pests and diseases or generally low vigor.  
331 Sampled trees were at least 30 meters apart and, where possible, were chosen along  
332 several parallel linear transects across each site, typically resulting in 2-4 transects per  
333 sampling site to keep the overall sampling area below 3 hectares.

### 334 **Site and tree metadata**

335 Sites were labeled by a two-letter country code (ISO 3166-1 alpha-2) followed by a two-letter  
336 species code and a two-digit site number (Table 1). Individual tree-labels added another two-  
337 digit tree number. Every tree was permanently labeled so that future studies can resample  
338 subsets or the entire GenTree collection for gaining time-series data of individual traits or to  
339 add new phenotypes to the analyses. Be aware, that permission of the respective  
340 landowners must be obtained before sampling. Handheld GPS devices were used to record  
341 the position of each tree. The precision of GPS measurements in forests is notoriously  
342 challenging: regular commercial devices achieve an accuracy of about 8-15 m with good  
343 satellite coverage. Given that trees were selected with a minimum distance of 30 m this  
344 accuracy was sufficient for the correct positioning of trees relative to each other. An overall  
345 population position was defined by taking the mean value across all the individual tree  
346 measurements. Coordinates were in decimal degrees with 4 decimal units to reflect the  
347 general measurement accuracy (~11.1 m) and were stored in the WGS 84 reference  
348 system. GPS devices were also used to record the tree's elevation, either directly or through



349 post-hoc positioning in digital elevation models. The local aspect at the site of the tree was  
350 measured by a compass in five-degree steps in the direction of the steepest slope.

351 The Metadata for each site consists of an ID code (see above), sampling date, location  
352 (GPS coordinates, see above), and elevation in meters above sea level (m a.s.l.). Each stand  
353 was also characterized as being monospecific or mixed (in the latter case the most common  
354 co-occurring species was noted), stand structure was noted as single or multiple layered,  
355 and the age distribution as even or uneven (categorical variables).

### 356 **Competition index at tree level**

357 Competition indices were calculated following Canham et al. <sup>23</sup> and Lorimer et al. <sup>24</sup>.

358 Specifically, the first index following Lorimer <sup>24</sup> was calculated as  $NCI = \sum_{i=1}^5 (DBH_j / DBH_i) / dist_i$   
359 that follows the same notation as above, and where  $DBH$  is the  $DBH$  of the subject trees  $j$   
360 and  $i$ .

361 Second, the distance-dependent competition index (NCI) following Canham et al. <sup>23</sup> was

362 computed as  $NCI = \sum_{i=1}^5 (DBH_i / dist_i)$  where  $DBH_i$  is the diameter at breast height of  
363 competitor tree  $i$ , and  $dist_i$  is the distance between the subject tree and competitor tree  $i$ .

364 This index assumes that the net effects of neighboring trees vary as a direct function of the  
365 size of the neighbors and as an inverse function of the distance. For this purpose, the  
366 distance to the five nearest neighbors of each target tree was measured and their respective  
367 diameter at breast height was measured.

368 Moreover, it was noted whether competitor trees were conspecific to the target tree or not.

369 Each multi-stemmed tree was considered as a single competitor where each stem larger  
370 than 15 cm DBH was measured and added to the sum of means.

### 371 **Environmental characteristics within subplots around each tree**

372 Surrounding each target tree, slope, vegetation cover (without tree cover), and stone content

373 were assessed in a 10 m x 10 m plot. The slope was assessed using a clinometer.  
374 Vegetation and rock cover were estimated in the classes <5%, 5-20%, 20-40%, 40-60%, 60-  
375 80%, 80-95%. Soil depth was estimated at three random points in the quadrat to a maximum  
376 of 60 cm with a pike and was averaged across these three values.

### 377 **Regeneration**

378 In the same 10 m x 10 m plots, natural regeneration of the target species was assessed  
379 according to the following four classes: absent (no recruit visible), scattered (few/scattered  
380 individuals), grouped (presence of scattered groups within the plot), and abundant (regularly  
381 spread all over the plot) and is indicated in the database with values from 1-4. As this  
382 method cannot resolve maternity, the results indicate realized fecundity at the stand level.

### 383 **Growth traits**

#### 384 **DBH (cm)**

385 DBH was measured at a stem height of 1.3 m using either a caliper by measuring two  
386 perpendicular diameters and subsequently taking the average of these two measurements  
387 or by measuring the circumference of the tree using a tape and computing the diameter from  
388 that value. Each measurement was performed to the nearest 0.1 cm. If a tree had more than  
389 one trunk, all of them were measured and the average was recorded.

#### 390 **Height (m)**

391 Height from the ground to the top of the crown was measured using a hypsometer (Nikon  
392 forestry Pro Laser), a laser vertex (Haglof Vertex III, Langsele, Sweden), or a Laser Range  
393 Meter (Bosch GLM 50 C, Leinfelden-Echterdingen, Germany). For short trees, a telescopic  
394 measuring pole was used. Height was noted to the nearest 0.1 m. To forego errors  
395 introduced by measuring height on sloping ground, height measurements on slopes were  
396 conducted from the same elevation as the tree's base by approaching the tree sideways.  
397 Where this was not possible, a slope correction factor was used.

398 **Crown size (m<sup>2</sup>)**

399 The crown size was measured as the circular and ellipsoid plane area of the crown. For this,  
400 we measured two perpendicular crown diameters (canopy 1 and 2) by using a measurement  
401 tape, with the first measurement being made along the longest axis of the crown, from one  
402 edge to the other, and by visually projecting the crown margin onto the ground to the nearest  
403 decimeter. For the ellipse area, we calculated  $\left(\frac{d_i}{2}\right) * \left(\frac{d_j}{2}\right) * \pi$  and for the circular area  
404  $(d_i+d_j)/2*\pi$ .

405 **Bark thickness (mm)**

406 For measuring bark thickness, we used bark gauges (Haglof Barktax) or a tape after  
407 extracting the bark with a small caliper (if bark could be detached without tree damage) or  
408 increment borers (Haglof increment borer) in case of strong and thick bark. Five  
409 measurements were taken for each tree at breast height and the average was calculated.  
410 For tree species with a clear dichotomy of bark thickness (e.g. old *Populus nigra*, *T.*  
411 *baccata*), we included at least two measurements from the thinner and thicker bark areas  
412 each.

413 **Number of fruits (units)**

414 In conifers, cones were counted by providing the average of three rounds of counting, made  
415 by an observer on the ground using binoculars. Only mature (brown) and closed cones were  
416 counted, i.e., those containing seeds, and not immature (green) or open cones, whose  
417 seeds had already been dispersed (open cones often stay on the branch for several years  
418 after seeds are dispersed). In broadleaves, the number of fruits was counted for 30 seconds,  
419 repeating the procedure three times to then average the three counts.

420 In the case of species with very small fruits that are hard to see individually and in locations  
421 with a very limited view of the canopy, each tree was assigned to one of five categories,  
422 namely 0 (no fruits), 1 (a few fruits in a small section of the crown), 2 (a few fruits in two or

423 more sections of the crown), 3 (a lot of fruits in a small section of the crown), and 4 (a lot of  
424 fruits in two or more sections of the crown).

#### 425 **Straightness**

426 Straightness of the stem was classified according to five levels: (1) No straight stem, (2)  
427 moderate or strong bends, (3) slight to moderate bend in different directions, (4) fairly  
428 straight (in one direction slightly crooked), (5) absolutely straight. This was performed on the  
429 lower 15 m of the tree beginning from the ground with the crown not taken into account. In  
430 the case of forked stems, only the trunk below the deepest forking point was evaluated.

#### 431 **Branch angle**

432 Branch angle was classified at two successive whorls according to a five-scale scheme in  
433 conifers with (1)  $<23^\circ$ , (2)  $23-45^\circ$ , (3)  $45-67^\circ$ , (4)  $67-90^\circ$ , (5)  $>90^\circ$ , and a four-scale scheme  
434 in broadleaves omitting the  $>90^\circ$  class. In black poplar, only the top two meters of the crown  
435 were considered.

#### 436 **Forking index**

437 The branching of a tree in two (fork) or more (ramiform) equally thick and long stems was  
438 assessed with a forking index. The index took into account two parameters. First a score for  
439 the relative position of the fork: (4) no forking, (3) forking in the upper third of the tree, (2)  
440 forking in the middle third of the tree, (1) forking in the lower third of the tree; and second the  
441 number of axes (stems). The score of the relative position was then multiplied by ten and  
442 divided by the number of axes.

### 443 **Modeled environmental data extracted for GenTree sites**

444 Topography, soil, and climate data were compiled to characterize environmental conditions  
445 in each GenTree sampling site as follows.

446 **Topography**

447 We used the European digital elevation model to describe topographic conditions at 25 m  
448 spatial resolution with a vertical accuracy of about  $\pm 7$  meters (EU-DEM v. 1.1 from the  
449 Copernicus program; <https://land.copernicus.eu/>). We derived 14 variables (Table 2) based  
450 on biological hypotheses and their informative power at the local scale <sup>25</sup>. We calculated  
451 morphometric, hydrologic, and radiation grids for each GenTree site and visually inspected  
452 data integrity using SAGA 6.2 <sup>26</sup> (details in Table 2).

453 **Soil**

454 We collected available data on water capacity at seven soil depths using SoilGrids250m <sup>27</sup>.  
455 We estimated Pearson's correlation coefficients,  $r$ , between soil layers and then averaged  
456 the four first superficial (0, 5, 15, and 30 cm) and the three deeper (60, 100, and 200 cm)  
457 layers that were highly correlated, respectively.

458 **Climate**

459 We extracted climate data with a high spatial resolution (30 arcsec) using CHELSA v. 1.2 <sup>28</sup>.  
460 CHELSA is based on a quasi-mechanistic statistical downscaling global reanalysis and  
461 global circulation model that, in particular, reliably interpolates the amount of precipitation  
462 using an orographic rainfall and wind effect. The dataset consisted of 48 climatic, 19  
463 bioclimatic, four drought- and two frost-related variables for the reference period 1979-2013  
464 (Table 2; <http://chelsa-climate.org/bioclim/>). We extracted all modeled environmental values  
465 for each individually geo-referenced tree using the *extract* function of the R package  
466 RASTER (Hijmans and van Etten 2016<sup>29</sup>). The surrounding conditions (i.e. adjacent pixels)  
467 of each tree were incorporated by the bilinear interpolation method when extracting the data.

468 **Table 1** Variables names, explanations, and specifications measured for all 4,959 trees and  
469 all 194 GenTree sites.

| Variable name             | Variable explanation | Specification |
|---------------------------|----------------------|---------------|
| GenTree Platform metadata |                      |               |

|                                                            |                               |                                                                                                                                                                                                                                                                                                                                        |
|------------------------------------------------------------|-------------------------------|----------------------------------------------------------------------------------------------------------------------------------------------------------------------------------------------------------------------------------------------------------------------------------------------------------------------------------------|
| m01.spec                                                   | Species abbreviations         | <i>Abies Alba</i> [AA], <i>Betula pendula</i> [BP], <i>Fagus sylvatica</i> [FS], <i>Picea abies</i> [PA], <i>Pinus cembra</i> [PC], <i>Pinus halepensis</i> [PH], <i>Pinus nigra</i> [PN], <i>Populus nigra</i> [PO], <i>Pinus pinaster</i> [PP], <i>Pinus sylvestris</i> [PS], <i>Quercus petraea</i> [QP], <i>Taxus baccata</i> [TB] |
| m02.country                                                | Country abbreviations         | Isocode 6133-2; Austria [AT], Switzerland [CH], Germany [DE], Spain [ES], Finland [FI], France [FR], Great Britain [GB], Greece [GR], Italy [IT], Lithuania [LT], Norway [NO], Sweden [SE]                                                                                                                                             |
| m03.site.num                                               | Site numbers                  | Running numbers of sites per species 01-24                                                                                                                                                                                                                                                                                             |
| m04.site.id                                                | Complete site-ID per species  | Merger of m01-m03                                                                                                                                                                                                                                                                                                                      |
| m05.tree.num                                               | Tree numbers                  | Running numbers within sites 01-25                                                                                                                                                                                                                                                                                                     |
| m06.tree.id                                                | Complete tree ID              | Merger of m01-m03, m05                                                                                                                                                                                                                                                                                                                 |
| m07.trial.name                                             | Site name                     |                                                                                                                                                                                                                                                                                                                                        |
| m08.lat                                                    | Latitude                      | Decimal degrees, WGS84                                                                                                                                                                                                                                                                                                                 |
| m09.lon                                                    | Longitude                     | Decimal degrees, WGS84                                                                                                                                                                                                                                                                                                                 |
| <b>GenTree Platform phenotypes</b>                         |                               |                                                                                                                                                                                                                                                                                                                                        |
| p01.height                                                 | Height                        | Tree height, m                                                                                                                                                                                                                                                                                                                         |
| p02.dbh                                                    | DBH                           | Diameter at breast height, cm                                                                                                                                                                                                                                                                                                          |
| p03.bark                                                   | Bark thickness mean           | Mean value of bark thickness, cm                                                                                                                                                                                                                                                                                                       |
| p04.trunk                                                  | Trunk straightness/flexuosity | 5: absolutely straight, 4: fairly straight (in one direction slightly crooked), 3: slight to moderate bend in different directions, 2: moderate or strong bends, 1: no straight stem                                                                                                                                                   |
| p05.branch                                                 | Branch angle                  | 1: <23° (steep), 2: 23° - 45°, 3: 45°-67°, 4: 67°-90° (plain), 5: >90°                                                                                                                                                                                                                                                                 |
| p06.fork                                                   | Forking index                 | 1: fork at the lower third of tree height, 2: fork at middle third, 3: fork at upper third, 4: no fork – multiplied by 10 and then divided by the number of stems                                                                                                                                                                      |
| p07.canopy.1                                               | Canopy projection REP 1       | Crown diameter projection, m                                                                                                                                                                                                                                                                                                           |
| p08.canopy.2                                               | Canopy projection REP 2       | Crown diameter projection, m                                                                                                                                                                                                                                                                                                           |
| p09.crown.ellipse                                          | Crown ellipse                 | Area of an ellipse $(d1/2)*(d2/2)*\pi$ , m <sup>2</sup>                                                                                                                                                                                                                                                                                |
| p10.crown.round                                            | Crown size                    | As some only have one diameter, round areas with the mean diameter $((D1+D2/2)/2)^2*\pi$ , m <sup>2</sup>                                                                                                                                                                                                                              |
| p11.regeneration                                           | Natural regeneration          | 1: absent, 2: scattered, 3: groups, 4: abundant                                                                                                                                                                                                                                                                                        |
| p12.fruit.mean                                             | Fruit/cone number             | Number of fruits.                                                                                                                                                                                                                                                                                                                      |
| p13.basal.area                                             |                               |                                                                                                                                                                                                                                                                                                                                        |
| <b>GenTree Platform in-situ environmental measurements</b> |                               |                                                                                                                                                                                                                                                                                                                                        |
| e01.plant.cover                                            | Total plant cover             | 1: none, 2: little (5-20%), 3: low (20-40%), 4: medium (40-60%), 5: high (60-80%), 6: very high (80-95%), 7: full cover (>95%)                                                                                                                                                                                                         |
| e02.comp.index.a                                           | Competition index A           | CI assessed following Canham et al 2004, and multi-stems as the sum                                                                                                                                                                                                                                                                    |
| e03.comp.index.b                                           | Competition index B           | CI assessed following Canham et al 2004, and multi-stems assessing the sum of basal areas and then the DBH                                                                                                                                                                                                                             |
| e04.comp.index.c                                           | Competition index C           | CI assessed following Lorimer 1983, and multi-stems as the sum                                                                                                                                                                                                                                                                         |
| e05.comp.index.d                                           | Competition index D           | CI assessed following Lorimer 1983, multi-stems assessing the sum of basal areas and then the DBH                                                                                                                                                                                                                                      |
| e06.status                                                 |                               | Dominant, co-dominant                                                                                                                                                                                                                                                                                                                  |
| e07.elevation                                              | Elevation of the tree         | Meters above sea level                                                                                                                                                                                                                                                                                                                 |
| e08.slope                                                  | Slope at the tree level       | Slope in degrees                                                                                                                                                                                                                                                                                                                       |
| e09.aspect                                                 | Aspect at the tree level      | 0-360°                                                                                                                                                                                                                                                                                                                                 |
| e10.soil.depth                                             | Mean soil depth               | Mean of 3 measures (measurement to a max. depth of 60 cm                                                                                                                                                                                                                                                                               |
| e11.stone.content                                          | Mean stone content            | Mean of 3 measures (1: none, 2: little (5-20%), 3: low (20-40%), 4: medium (40-60%), 5: high (60-80%), 6: very high (80-95%), 7: full cover (>95%)                                                                                                                                                                                     |
| e12.rock.cover                                             | Total rock cover              | 1: none, 2: little (5-20%), 3: low (20-40%), 4: medium (40-60%), 5: high (60-80%), 6: very high (80-95%), 7: full cover (>95%)                                                                                                                                                                                                         |

470

471

472 **Table 2** Environmental variable names, explanations, and specifications modeled for all  
473 4959 trees and 194 GenTree sites.

| Variable name                                            | Variable explanation                | Specification                                           |
|----------------------------------------------------------|-------------------------------------|---------------------------------------------------------|
| <b>GenTree Platform modeled environmental parameters</b> |                                     |                                                         |
| sample                                                   | Sample identification               | unit: none; resolution [m]: none                        |
| country                                                  | Country code                        | unit: none; resolution [m]: none                        |
| countryspecies                                           | Country and species code            | unit: none; resolution [m]: none                        |
| species                                                  | Species code                        | unit: none; resolution [m]: none                        |
| population                                               | Population identification           | unit: none; resolution [m]: none                        |
| latwgs84                                                 | Latitude in WGS84                   | unit: degree; resolution [m]: 25                        |
| lonwgs84                                                 | Longitude in WGS84                  | unit: degree; resolution [m]: 25                        |
| latetrs89                                                | Latitude in ETRS89                  | unit: degree; resolution [m]: 25                        |
| lonetrs89                                                | Longitude in ETRS89                 | unit: degree; resolution [m]: 25                        |
| t01alt                                                   | Altitude                            | unit: m; resolution [m]: 25                             |
| t02slp                                                   | Slope                               | unit: degree; resolution [m]: 25                        |
| t03asp                                                   | Eastness                            | unit: degree; resolution [m]: 25                        |
| t04vcu                                                   | Profile curvature                   | unit: degree/m; resolution [m]: 25                      |
| t05hcu                                                   | Horizontal curvature                | unit: degree/m; resolution [m]: 25                      |
| t06ddg                                                   | Downslope distance gradient         | unit: degree; resolution [m]: 25                        |
| t07mpi                                                   | Morphometric protection index       | unit: none; resolution [m]: 25                          |
| t08tpi                                                   | Topographic position index          | unit: none; resolution [m]: 25                          |
| t09vrm                                                   | Vector ruggedness measure           | unit: none; resolution [m]: 25                          |
| t10twi                                                   | Topographic wetness index           | unit: none; resolution [m]: 25                          |
| t11svf                                                   | Sky-view factor                     | unit: none; resolution [m]: 25                          |
| t12sdir                                                  | Potential direct solar radiation    | unit: kJ/m <sup>2</sup> ; resolution [m]: 25            |
| t13sdif                                                  | Potential diffuse solar radiation   | unit: kJ/m <sup>2</sup> ; resolution [m]: 25            |
| t14stot                                                  | Potential total solar radiation     | unit: kJ/m <sup>2</sup> ; resolution [m]: 25            |
| awc15                                                    | Available water capacity (0-30cm)   | unit: %; resolution [m]: 250                            |
| awc140                                                   | Available water capacity (60-200cm) | unit: %; resolution [m]: 250                            |
| bio01                                                    | Yearly mean temperature             | unit: °C/10; resolution [m]: 1000                       |
| bio02                                                    | Mean diurnal range                  | unit: °C/10; resolution [m]: 1000                       |
| bio03                                                    | Isothermality                       | unit: °C/10; resolution [m]: 1000                       |
| bio04                                                    | Temperature seasonality             | unit: °C/10; resolution [m]: 1000                       |
| bio05                                                    | Max temperature of warmest month    | unit: °C/10; resolution [m]: 1000                       |
| bio06                                                    | Min temperature of coldest month    | unit: °C/10; resolution [m]: 1000                       |
| bio07                                                    | Temperature annual range            | unit: °C/10; resolution [m]: 1000                       |
| bio08                                                    | Mean temperature of wettest quarter | unit: °C/10; resolution [m]: 1000                       |
| bio09                                                    | Mean temperature of driest quarter  | unit: °C/10; resolution [m]: 1000                       |
| bio10                                                    | Mean temperature of warmest quarter | unit: °C/10; resolution [m]: 1000                       |
| bio11                                                    | Mean temperature of coldest quarter | unit: °C/10; resolution [m]: 1000                       |
| bio12                                                    | Yearly precipitation sum            | unit: kg m <sup>-2</sup> ; resolution [m]: 1000         |
| bio13                                                    | Precipitation of wettest month      | unit: kg m <sup>-2</sup> ; resolution [m]: 1000         |
| bio14                                                    | Precipitation of driest month       | unit: kg m <sup>-2</sup> ; resolution [m]: 1000         |
| bio15                                                    | Precipitation seasonality           | unit: kg m <sup>-2</sup> ; resolution [m]: 1000         |
| bio16                                                    | Precipitation of wettest quarter    | unit: kg m <sup>-2</sup> ; resolution [m]: 1000         |
| bio17                                                    | Precipitation of driest quarter     | unit: kg m <sup>-2</sup> ; resolution [m]: 1000         |
| bio18                                                    | Precipitation of warmest quarter    | unit: kg m <sup>-2</sup> ; resolution [m]: 1000         |
| bio19                                                    | Precipitation of coldest quarter    | unit: kg m <sup>-2</sup> ; resolution [m]: 1000         |
| gdd                                                      | Growing degree days                 | unit: °C; resolution [m]: 1000                          |
| gsp                                                      | Accumulated precipitation           | unit: kg m <sup>-2</sup> ; resolution [m]: 1000         |
| shc                                                      | Hydrothermic coefficient            | unit: (kg m <sup>-2</sup> /10)/°C; resolution [m]: 1000 |
| rh410                                                    | Relative humidity                   | unit: %; resolution [m]: 1000                           |
| fcf                                                      | Frost change frequency              | unit: number of events; resolution [m]: 1000            |
| nfd                                                      | Number of frost days                | unit: number of days; resolution [m]: 1000              |
| prec01                                                   | Precipitation sum in January        | unit: kg m <sup>-2</sup> ; resolution [m]: 1000         |
| prec02                                                   | Precipitation sum in February       | unit: kg m <sup>-2</sup> ; resolution [m]: 1000         |
| prec03                                                   | Precipitation sum in March          | unit: kg m <sup>-2</sup> ; resolution [m]: 1000         |
| prec04                                                   | Precipitation sum in April          | unit: kg m <sup>-2</sup> ; resolution [m]: 1000         |
| prec05                                                   | Precipitation sum in May            | unit: kg m <sup>-2</sup> ; resolution [m]: 1000         |
| prec06                                                   | Precipitation sum in June           | unit: kg m <sup>-2</sup> ; resolution [m]: 1000         |
| prec07                                                   | Precipitation sum in July           | unit: kg m <sup>-2</sup> ; resolution [m]: 1000         |
| prec08                                                   | Precipitation sum in August         | unit: kg m <sup>-2</sup> ; resolution [m]: 1000         |
| prec09                                                   | Precipitation sum in September      | unit: kg m <sup>-2</sup> ; resolution [m]: 1000         |
| prec10                                                   | Precipitation sum in October        | unit: kg m <sup>-2</sup> ; resolution [m]: 1000         |
| prec11                                                   | Precipitation sum in November       | unit: kg m <sup>-2</sup> ; resolution [m]: 1000         |
| prec12                                                   | Precipitation sum in December       | unit: kg m <sup>-2</sup> ; resolution [m]: 1000         |
| tmean01                                                  | Mean temperature in January         | unit: °C/10; resolution [m]: 1000                       |

|         |                                  |                                   |
|---------|----------------------------------|-----------------------------------|
| tmean02 | Mean temperature in February     | unit: °C/10; resolution [m]: 1000 |
| tmean03 | Mean temperature in March        | unit: °C/10; resolution [m]: 1000 |
| tmean04 | Mean temperature in April        | unit: °C/10; resolution [m]: 1000 |
| tmean05 | Mean temperature in May          | unit: °C/10; resolution [m]: 1000 |
| tmean06 | Mean temperature in June         | unit: °C/10; resolution [m]: 1000 |
| tmean07 | Mean temperature in July         | unit: °C/10; resolution [m]: 1000 |
| tmean08 | Mean temperature in August       | unit: °C/10; resolution [m]: 1000 |
| tmean09 | Mean temperature in September    | unit: °C/10; resolution [m]: 1000 |
| tmean10 | Mean temperature in October      | unit: °C/10; resolution [m]: 1000 |
| tmean11 | Mean temperature in November     | unit: °C/10; resolution [m]: 1000 |
| tmean12 | Mean temperature in December     | unit: °C/10; resolution [m]: 1000 |
| tmin01  | Minimum temperature in January   | unit: °C/10; resolution [m]: 1000 |
| tmin02  | Minimum temperature in February  | unit: °C/10; resolution [m]: 1000 |
| tmin03  | Minimum temperature in March     | unit: °C/10; resolution [m]: 1000 |
| tmin04  | Minimum temperature in April     | unit: °C/10; resolution [m]: 1000 |
| tmin05  | Minimum temperature in May       | unit: °C/10; resolution [m]: 1000 |
| tmin06  | Minimum temperature in June      | unit: °C/10; resolution [m]: 1000 |
| tmin07  | Minimum temperature in July      | unit: °C/10; resolution [m]: 1000 |
| tmin08  | Minimum temperature in August    | unit: °C/10; resolution [m]: 1000 |
| tmin09  | Minimum temperature in September | unit: °C/10; resolution [m]: 1000 |
| tmin10  | Minimum temperature in October   | unit: °C/10; resolution [m]: 1000 |
| tmin11  | Minimum temperature in November  | unit: °C/10; resolution [m]: 1000 |
| tmin12  | Minimum temperature in December  | unit: °C/10; resolution [m]: 1000 |
| tmax01  | Maximum temperature in January   | unit: °C/10; resolution [m]: 1000 |
| tmax02  | Maximum temperature in February  | unit: °C/10; resolution [m]: 1000 |
| tmax03  | Maximum temperature in March     | unit: °C/10; resolution [m]: 1000 |
| tmax04  | Maximum temperature in April     | unit: °C/10; resolution [m]: 1000 |
| tmax05  | Maximum temperature in May       | unit: °C/10; resolution [m]: 1000 |
| tmax06  | Maximum temperature in June      | unit: °C/10; resolution [m]: 1000 |
| tmax07  | Maximum temperature in July      | unit: °C/10; resolution [m]: 1000 |
| tmax08  | Maximum temperature in August    | unit: °C/10; resolution [m]: 1000 |
| tmax09  | Maximum temperature in September | unit: °C/10; resolution [m]: 1000 |
| tmax10  | Maximum temperature in October   | unit: °C/10; resolution [m]: 1000 |
| tmax11  | Maximum temperature in November  | unit: °C/10; resolution [m]: 1000 |
| tmax12  | Maximum temperature in December  | unit: °C/10; resolution [m]: 1000 |

474 The local environmental contrasts varied among species and population pairs, most of which  
475 exhibited variability concerning elevation, temperature, precipitation, and water availability.  
476 Other local contrasts were based on radiation, soil water capacity, and topographic wetness  
477 index (among others). One special case is *Populus nigra*, a heliophilous pioneer species  
478 found naturally in riverine areas. Given this specific habitat, local contrasts were largely  
479 bound to the distance of the individual trees from the riverbed and thus for example to  
480 groundwater access or exposure to variation in the intensity and frequency of floods.



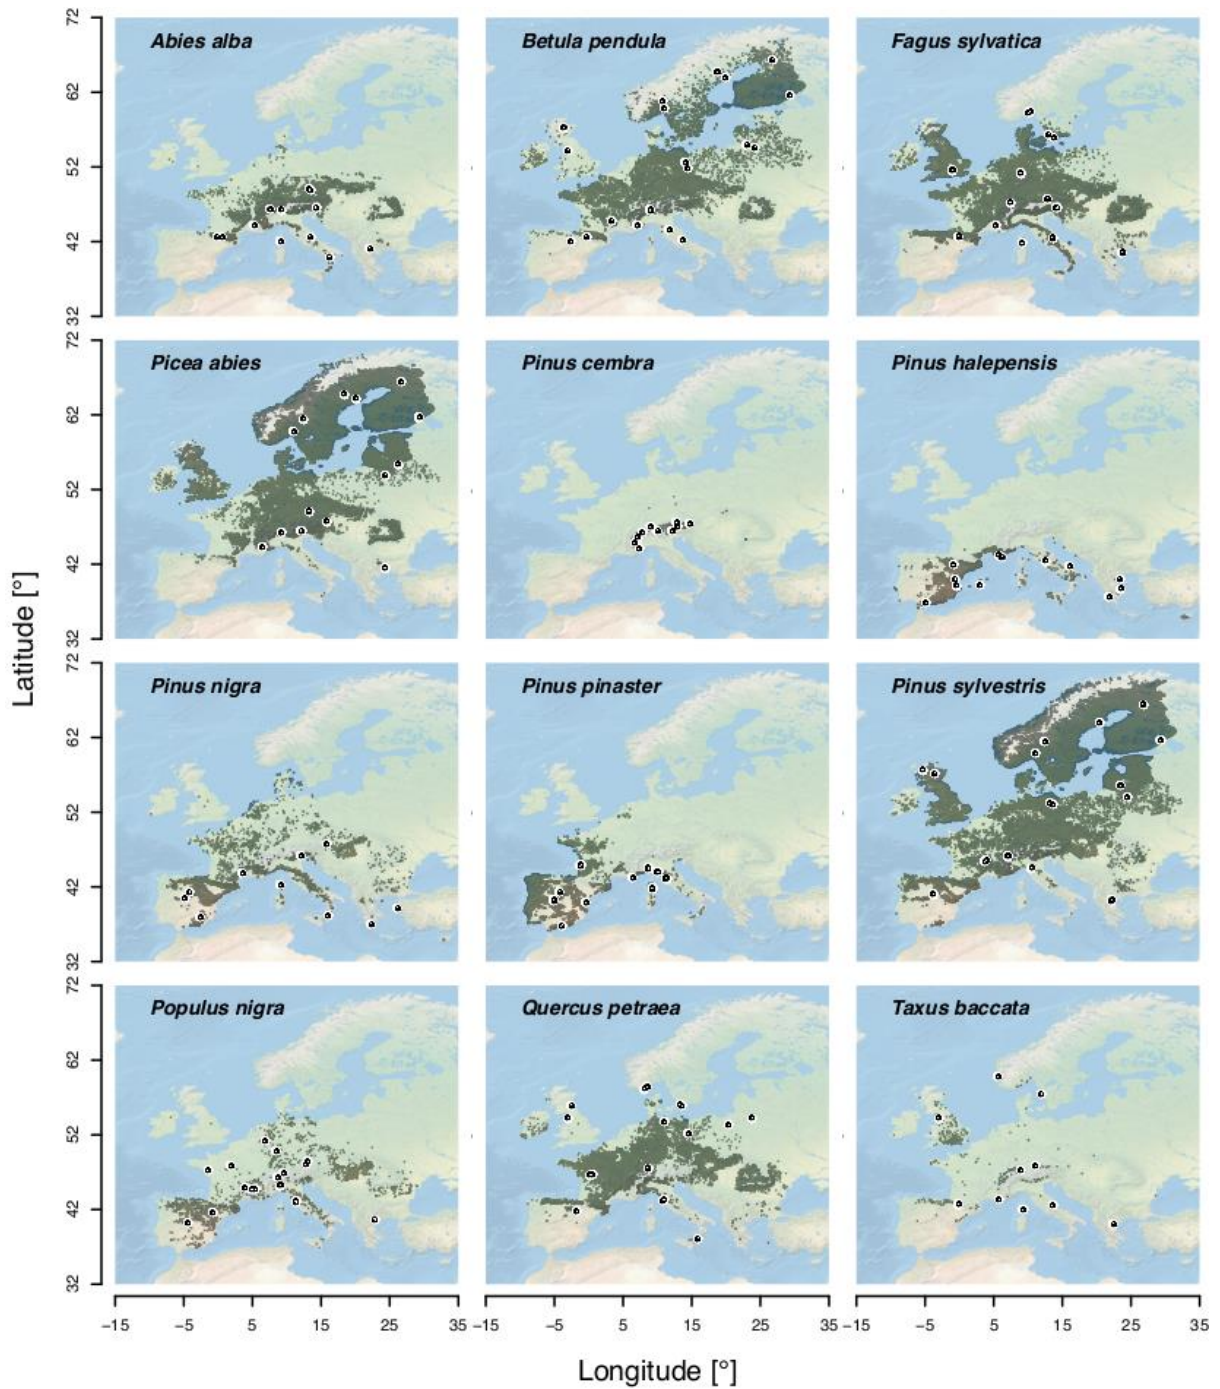

481  
 482  
 483  
 484

**Fig. 1** Sampling sites (black dots) and distributions of the twelve selected tree species (dark-green shading) for *in-situ* phenotype measurements. Distribution maps are based on a comprehensive high-resolution tree occurrence dataset from the European Union <sup>30</sup>.

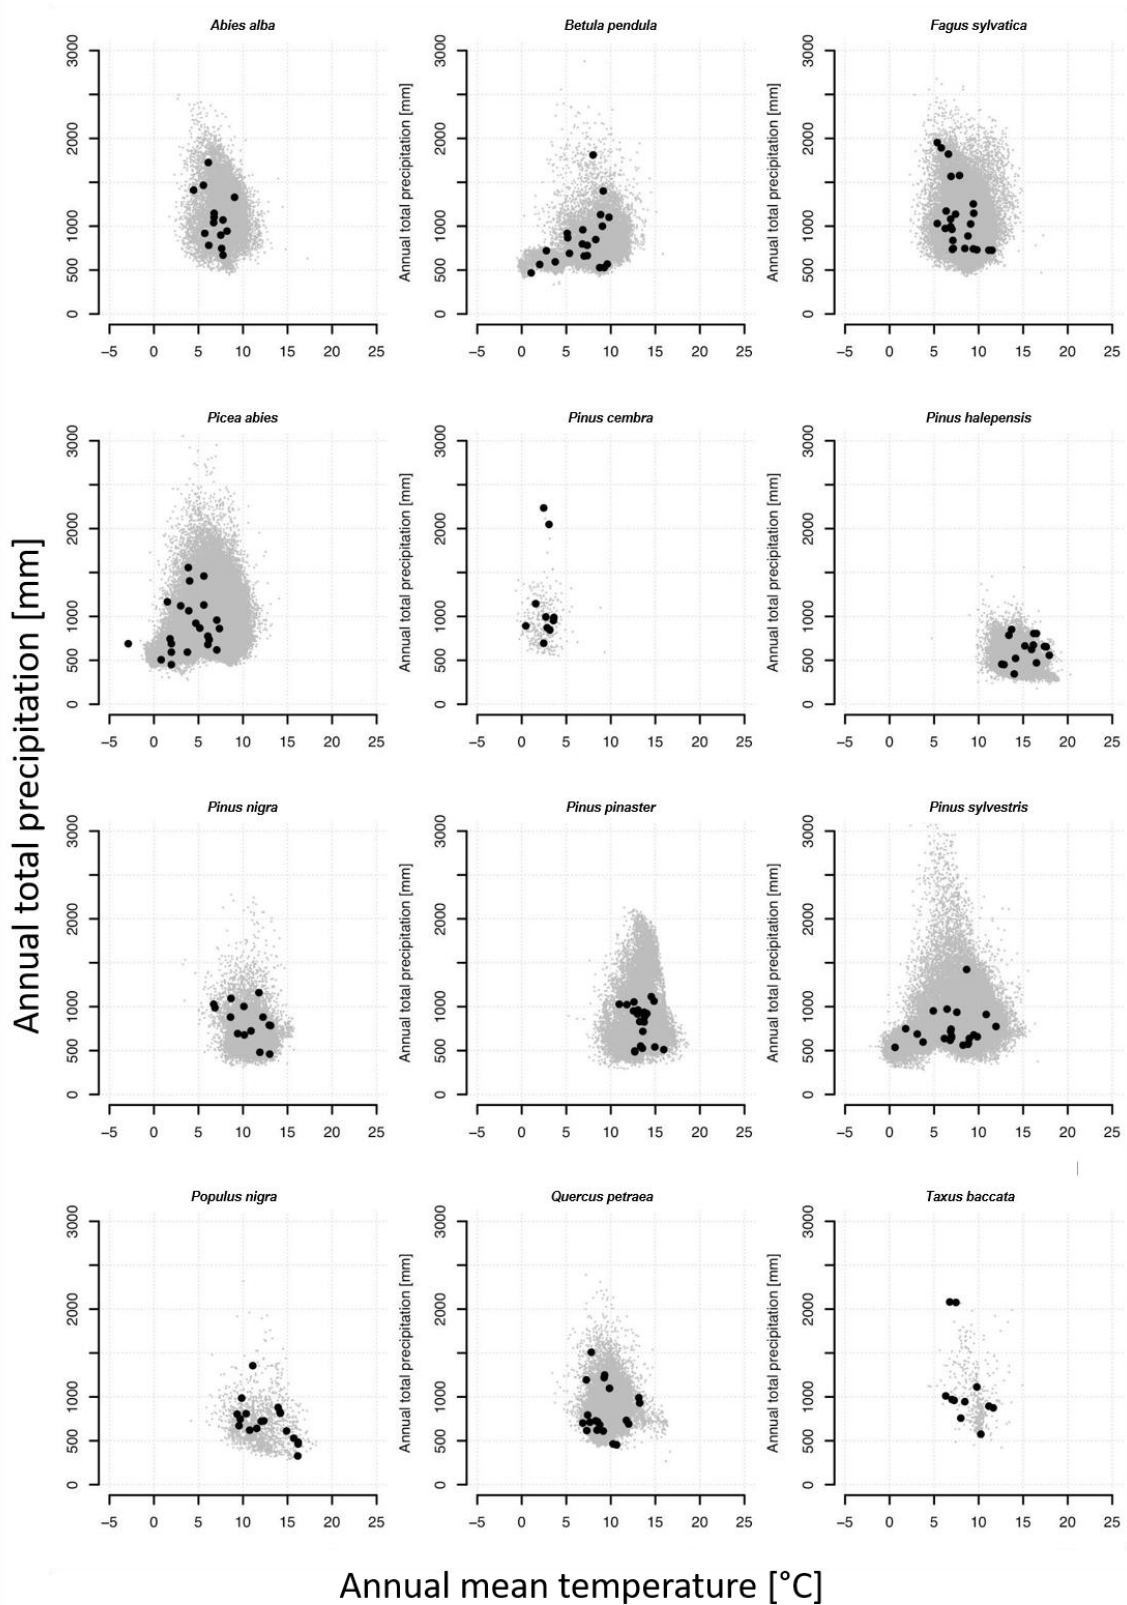

485  
486  
487  
488  
489

**Fig. 2** Climate-space diagrams for the 12 selected European tree species with annual mean temperature on the x-axis and annual total precipitation on the y-axis. Grey points represent species occurrences based on a comprehensive high-resolution tree occurrence dataset for Europe<sup>30</sup> and black dots indicate the GenTree sites.

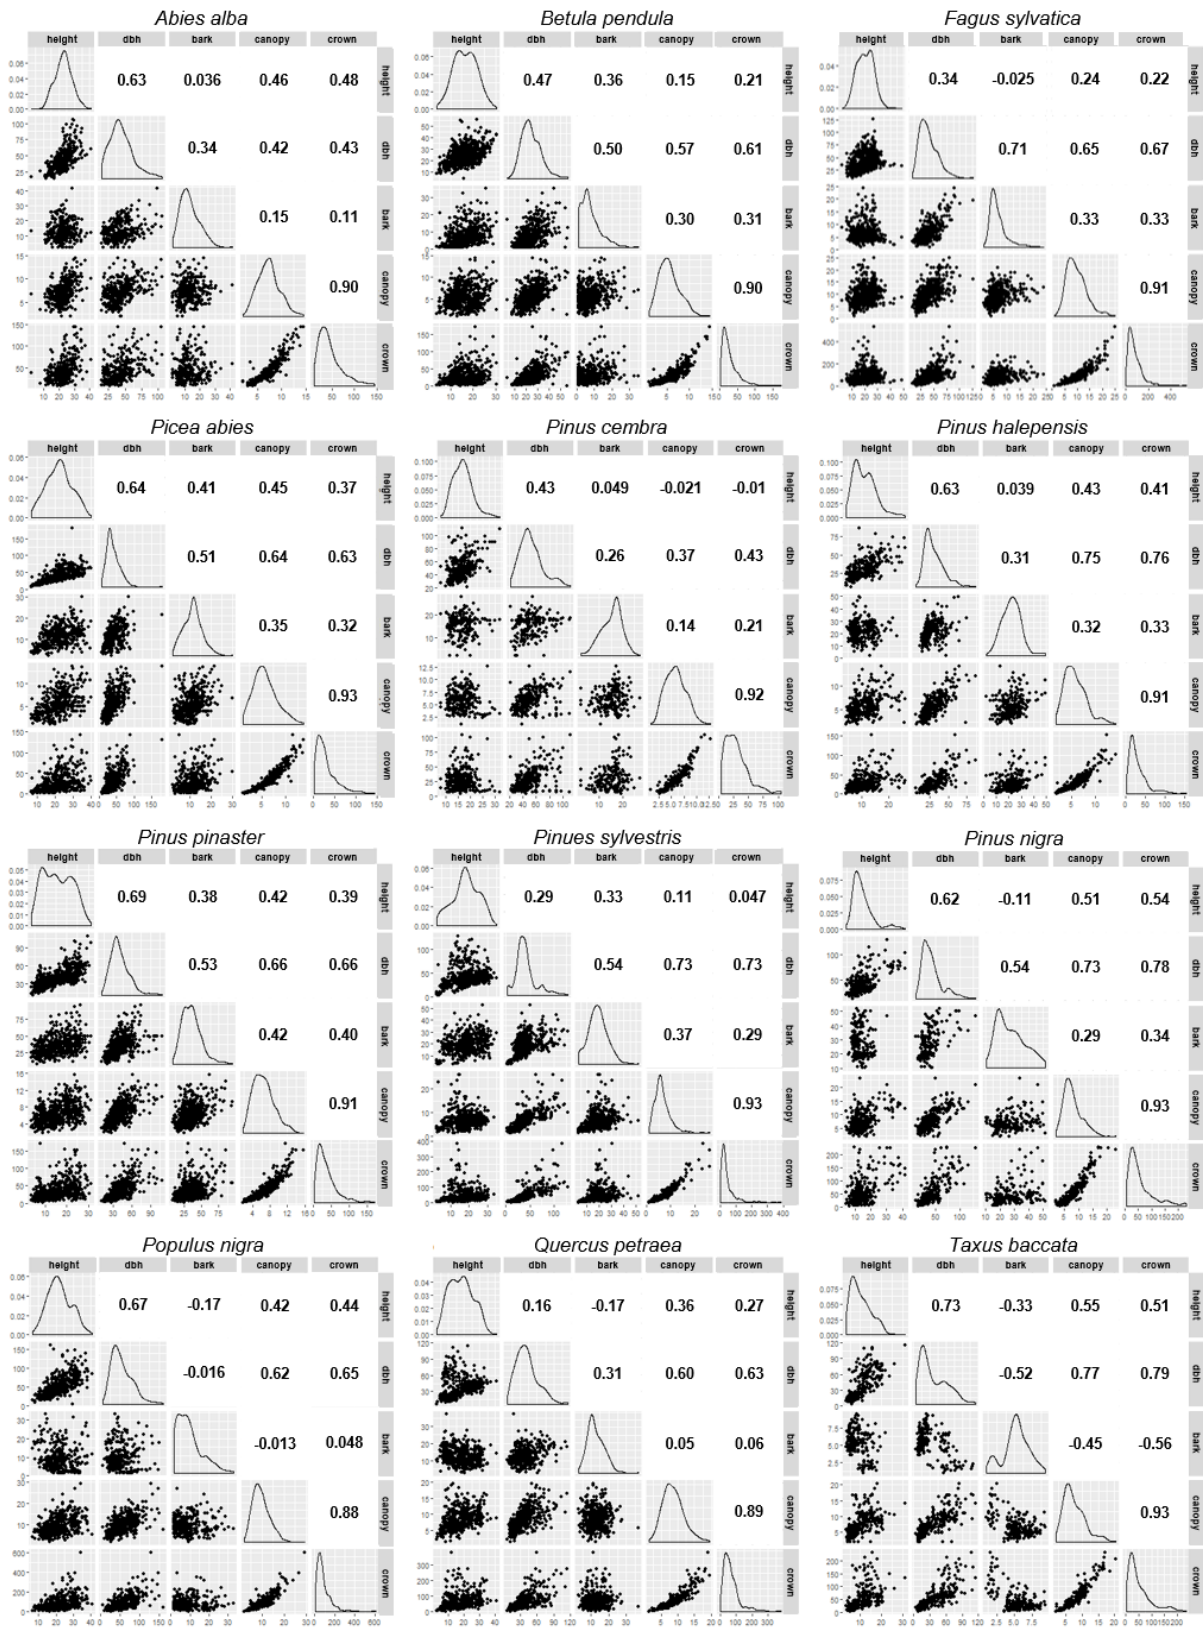

**Fig. 3** Scatterplots, distributions, and Pearson's correlation coefficients,  $r$ , of GenTree phenotype measurements in the 12 selected European tree species.

490  
491  
492

493

## 494 Data validation and quality control

495 The database has been checked for consistency at different stages by various researchers  
496 between 2018-2020. Raw data were submitted by all partners to the GnpIS multispecies  
497 integrative information system (<https://urgi.versailles.inra.fr/Tools/GnpIS> ) using preformatted  
498 Microsoft Excel templates. Data files were harmonized, merged, and subsequently verified  
499 following several steps:

- 500 1. Missing data and dubious entries were checked manually by examining the original  
501 data files obtained from the partners and by cross-checking cases with field books.
- 502 2. Descriptive statistics were calculated and plotted for all variables including minima,  
503 maxima, means, and variances. Outliers were checked against original data records  
504 and corrected when necessary.
- 505 3. Covariables were plotted determining whether relationships were reasonable and  
506 following the most complete set of similar relationships (Fig. 3).

## 507 Data Records

508 The data presented are structured in four independent csv files  
509 (GenTree\_modelled\_environmental\_data.csv,  
510 GenTree\_modelled\_environmental\_data\_metadata.csv,  
511 GenTree\_phenotypes\_and\_insitu\_environmental\_data.csv, and  
512 GenTree\_phenotypes\_and\_insitu\_environmental\_data\_metadata.csv) that can be merged  
513 using the site identifier (m04.site.id) or tree identifier (m06.tree.id). The same codes can be  
514 used to merge additional data namely from the GenTree Dendroecological Collection <sup>16</sup>, the  
515 GenTree Leaf Trait Collection<sup>17</sup>, and the GenTree Genomic Collection (personal  
516 communication). The first file contains the modeled environmental data, the second its  
517 metadata, the third the individual phenotypic traits and the insitu environmental data, and the  
518 fourth the metadata of the latter.

519 Availability of supporting data

520

521 The data files are available at the GigaDB repository [31] under a CC0 license. Excel

522 versions of the data are available from figshare [32]. All the data are indexed in Table 2.

523

## 524 Acknowledgements¶¶

525 We would like to thank Juri Nievergelt, Anne Verstege, Marina Fonti, Kevin Kleeb, Frederick

526 Reinig, Enrica Zalloni, Claudio de Sassi, Giacomo Poli for their field assistance. This work

527 was performed using GnpIS, one of the facilities of the URGI platform

528 (<https://urgi.versailles.inra.fr/>). We are also grateful to all the forest owners and national

529 administrations for providing sampling permissions.

## 530 Author contributions¶¶

531 LO, RB, KH, BF, TM, FV, FAA, SC coordinated sampling design.

532 All authors contributed to the sampling design

533 LO, RB, KH, BF, TM, FV, FAA, SC coordinated field sampling.¶¶

534 All authors contributed to the field sampling.

535 CM, MB compiled and assembled in-situ measurements in the GnpIS database.¶¶

536 BD extracted climatic and topographic data and derived environmental indices for all the

537 sampling sites.¶¶

538 RB, LO, BD, PAA, CM curated data, checked quality, and prepared the data sets with

539 metadata descriptions for sharing and potential reuse.¶¶

540 LO, KH, BD, SC, BF wrote the manuscript.¶¶

541 BF coordinated GenTree

542 All authors commented on an earlier version and approved the current version of the

543 manuscript.

## 544 Competing interests¶

545 The authors declare no competing interest.

## 546 Funding

547 This publication is part of the GenTree project which was funded by the European Union's  
548 Horizon 2020 research and innovation program under grant agreement No. 676876  
549 (GenTree). This work was also supported by the Swiss Secretariat for Education, Research  
550 and Innovation (SERI) under contract No. 6.0032.

## References

- 552 1. Schuldt, B. *et al.* A first assessment of the impact of the extreme 2018 summer drought  
553 on Central European forests. *Basic and Applied Ecology* **45**, 86–103;  
554 10.1016/j.baae.2020.04.003 (2020).
- 555 2. Sitch, S. *et al.* Evaluation of the terrestrial carbon cycle, future plant geography and  
556 climate-carbon cycle feedbacks using five Dynamic Global Vegetation Models (DGVMs).  
557 *Global Change Biology* **14**, 2015–2039; 10.1111/j.1365-2486.2008.01626.x (2008).
- 558 3. Loarie, S. R. *et al.* The velocity of climate change. *Nature* **462**, 1052–1055;  
559 10.1038/nature08649 (2009).
- 560 4. Pachauri, R. K. & Mayer, L. (eds.). *Climate change 2014. Synthesis report*  
561 (Intergovernmental Panel on Climate Change, Geneva, Switzerland, 2015).
- 562 5. Savolainen, O., Pyhäjärvi, T. & Knürr, T. Gene Flow and Local Adaptation in Trees.  
563 *Annu. Rev. Ecol. Evol. Syst.* **38**, 595–619; 10.1146/annurev.ecolsys.38.091206.095646  
564 (2007).
- 565 6. Kremer, A. *et al.* Long-distance gene flow and adaptation of forest trees to rapid climate  
566 change. *Ecology Letters* **15**, 378–392; 10.1111/j.1461-0248.2012.01746.x (2012).
- 567 7. Eveno, E. *et al.* Contrasting patterns of selection at *Pinus pinaster* Ait. Drought stress  
568 candidate genes as revealed by genetic differentiation analyses. *Molecular Biology and*  
569 *Evolution* **25**, 417–437; 10.1093/molbev/msm272 (2008).
- 570 8. Holliday, J. A., Ritland, K. & Aitken, S. N. Widespread, ecologically relevant genetic  
571 markers developed from association mapping of climate-related traits in Sitka spruce  
572 (*Picea sitchensis*). *New Phytologist* **188**, 501–514; 10.1111/j.1469-8137.2010.03380.x  
573 (2010).
- 574 9. Chen, J. *et al.* Clinal variation at phenology-related genes in spruce: parallel evolution in  
575 FTL2 and Gigantea? *Genetics* **197**, 1025–1038; 10.1534/genetics.114.163063 (2014).
- 576 10. González-Martínez, S. C., Ersoz, E., Brown, G. R., Wheeler, N. C. & Neale, D. B. DNA  
577 sequence variation and selection of tag single-nucleotide polymorphisms at candidate  
578 genes for drought-stress response in *Pinus taeda* L. *Genetics* **172**, 1915–1926;  
579 10.1534/genetics.105.047126 (2006).
- 580 11. González-Martínez, S. C., Krutovsky, K. V. & Neale, D. B. Forest-tree population  
581 genomics and adaptive evolution. *New Phytologist* **170**, 227–238; 10.1111/j.1469-  
582 8137.2006.01686.x (2006).
- 583 12. Yeaman, S. *et al.* Convergent local adaptation to climate in distantly related conifers.  
584 *Science (New York, N. Y.)* **353**, 1431–1433; 10.1126/science.aaf7812 (2016).
- 585 13. Scotti, I., González-Martínez, S. C., Budde, K. B. & Lalagüe, H. Fifty years of genetic  
586 studies: what to make of the large amounts of variation found within populations? *Annals*  
587 *of Forest Science* **73**, 69–75; 10.1007/s13595-015-0471-z (2016).
- 588 14. Alexandre, H. *et al.* *In situ* estimation of genetic variation of functional and ecological  
589 traits in *Quercus petraea* and *Q. robur* (2018).
- 590 15. Dungey, H. S. *et al.* Phenotyping Whole Forests Will Help to Track Genetic Performance.  
591 *Trends in Plant Science* **23**, 854–864; 10.1016/j.tplants.2018.08.005 (2018).

- 592 16. Martínez-Sancho, E. *et al.* The GenTree Dendroecological Collection, tree-ring and wood  
593 density data from seven tree species across Europe. *Scientific Data* **7**, 1;  
594 10.1038/s41597-019-0340-y (2020).
- 595 17. Raquel Benavides *et al.* The GenTree Leaf Collection: inter- and intraspecific leaf  
596 variation in seven forest tree species in Europe. *Global Ecology and Biogeography*;  
597 10.1111/geb.13239.
- 598 18. Steinbach, D. *et al.* GnpIS: an information system to integrate genetic and genomic data  
599 from plants and fungi. *Database : the journal of biological databases and curation* **2013**,  
600 bat058; 10.1093/database/bat058 (2013).
- 601 19. Lotterhos, K. E. & Whitlock, M. C. Evaluation of demographic history and neutral  
602 parameterization on the performance of FST outlier tests. *Molecular Ecology* **23**, 2178–  
603 2192; 10.1111/mec.12725 (2014).
- 604 20. Lotterhos, K. E. & Whitlock, M. C. The relative power of genome scans to detect local  
605 adaptation depends on sampling design and statistical method. *Molecular Ecology* **24**,  
606 1031–1046; 10.1111/mec.13100 (2015).
- 607 21. Eckert, A. J. *et al.* Back to nature: ecological genomics of loblolly pine (*Pinus taeda*,  
608 Pinaceae). *Molecular Ecology* **19**, 3789–3805; 10.1111/j.1365-294X.2010.04698.x  
609 (2010).
- 610 22. Lind, B. M. *et al.* Water availability drives signatures of local adaptation in whitebark pine  
611 (*Pinus albicaulis* Engelm.) across fine spatial scales of the Lake Tahoe Basin, USA.  
612 *Molecular Ecology* **26**, 3168–3185; 10.1111/mec.14106 (2017).
- 613 23. Canham, C. D., LePage, P. T. & Coates, K. D. A neighborhood analysis of canopy tree  
614 competition: effects of shading versus crowding. *Can. J. For. Res.* **34**, 778–787;  
615 10.1139/x03-232 (2004).
- 616 24. Lorimer, C. G. Tests of age-independent competition indices for individual trees in natural  
617 hardwood stands. *Forest Ecology and Management* **6**, 343–360 (1983).
- 618 25. Leempoel, K. *et al.* Very high-resolution digital elevation models: are multi-scale derived  
619 variables ecologically relevant? *Methods Ecol Evol* **6**, 1373–1383; 10.1111/2041-  
620 210X.12427 (2015).
- 621 26. Conrad, O. *et al.* System for Automated Geoscientific Analyses (SAGA) v. 2.1.4. *Geosci.*  
622 *Model Dev. Discuss.* **8**, 2271–2312; 10.5194/gmdd-8-2271-2015 (2015).
- 623 27. Hengl, T. *et al.* Mapping Soil Properties of Africa at 250 m Resolution: Random Forests  
624 Significantly Improve Current Predictions. *PLoS ONE* **10**, e0125814;  
625 10.1371/journal.pone.0125814 (2015).
- 626 28. Karger, D. N. *et al.* Climatologies at high resolution for the earth's land surface areas.  
627 *Scientific Data* **4**, 170122; 10.1038/sdata.2017.122 (2017).
- 628 29. Hijmans, R. & van Etten, J. *raster: Geographic data analysis and modeling. R package*  
629 (2016).
- 630 30. Mauri, A., Strona, G. & San-Miguel-Ayanz, J. EU-Forest, a high-resolution tree  
631 occurrence dataset for Europe. *Scientific Data* **4**, 160123; 10.1038/sdata.2016.123  
632 (2017).



- 633 31. Opgenoorth L, Dauphin B, Benavides R, Heer K; Alizoti P; Martínez-Sancho E et al.  
634 Supporting data for "The GenTree Platform: growth traits and tree-level environmental  
635 data in twelve European forest tree species" GigaScience Database. 2021  
636 <http://dx.doi.org/10.5524/100855>
- 637 32. Opgenoorth L, Dauphin B, Benavides R, Heer K; Alizoti P; Martínez-Sancho E et al. Data  
638 for "The GenTree Platform". Figshare database.  
639 <https://figshare.com/s/4d57474fd63864a6dfd8>
